# Supplementary material for: New method for C–H arylation/alkylation at α-position of cyclic aliphatic ethers by iron-oxide mediated reaction
Source: Royal Society of Chemistry journal article supplement (doi:10.1039/c1ob06660a), 2012-01-01

## Supplementary Information

### **New method for C-H arylation/alkylation at $\alpha$ -position of cyclic aliphatic ethers by iron-oxide mediated reaction**

Parvinder Pal Singh\*, Satish Gudup, Hariprasad Aruri, Umed Singh, Srinivas Ambala, Mahipal Yadav, Sanghapal D. Sawant and Ram A. Vishwakarma\*

*Medicinal Chemistry Division, Indian Institute of Integrative Medicine (Council of Scientific & Industrial Research) Jammu 180 001, India*

*Tel.: +91-191-2569111, Fax: +91-191-2569333,*

*e-mail: [ram@iiim.res.in](mailto:ram@iiim.res.in) and [ppsingh@iiim.res.in](mailto:ppsingh@iiim.res.in)*

## Table of Contents

| <b>S. No.</b> | <b>Contents</b>                                               | <b>Page Nos.</b> |
|---------------|---------------------------------------------------------------|------------------|
| <b>1.0.</b>   | <b>Tables</b>                                                 | <b>S3</b>        |
| <b>1.1</b>    | Table 5: containing chemical shift values of CH-Ar & CH-Alkyl | S3               |
| <b>2.0.</b>   | <b>Spectroscopic data</b>                                     | <b>S4-S55</b>    |
| <b>2.1.</b>   | Scanned spectral data of compounds                            | S4-S55           |

## 1.0 Tables

### 1.1 Table 5: containing chemical shift value of CH-Ar & CH-Alkyl

| S. No. | Entry     | $\delta$ CH-Ar & CH-Alkyl ( $^1\text{H}$ NMR) | C-Ar & CH-Alkyl $^{13}\text{C}$ NMR             | C-Ar & CH-Alkyl DEPT  |
|--------|-----------|-----------------------------------------------|-------------------------------------------------|-----------------------|
| 1      | 2a, b & n | 4.70-4.72 (t)                                 | 74.27                                           | 74.29                 |
| 2      | 2c, d & o | 4.66-4.70 (dd)                                | 73.72                                           | 73.41                 |
| 3      | 2e        | 4.92-4.95 (t)                                 | 70.28                                           | 70.27                 |
| 4      | 2f        | 4.69-4.72 (t)                                 | 74.20                                           | 74.19                 |
| 5      | 2g & p    | 4.65-4.68 (t)                                 | 73.99                                           | 73.99                 |
| 6      | 2h & q    | 4.70-4.73 (t)                                 | 74.12                                           | 74.15                 |
| 7      | 2i        | 4.70-4.73 (t)                                 | 73.32                                           | 73.37                 |
| 8      | 2j        | 4.70-4.73 (dd)                                | 73.45                                           | 73.45                 |
| 9      | 2k        | 4.68-4.70 (t)                                 | 73.02                                           | 73.03                 |
| 10     | 2l        | 5.46 (brn),                                   | 71.38                                           | 69.91                 |
| 11     | 2m        | 4.72-4.74 (m)                                 | 70.51                                           | 70.52                 |
| 12     | 2r        | 3.62-3.64 (m, signal merged with other peak)  | 71.97                                           | 71.93                 |
| 13     | 2s        | 3.62-3.64 (m, signal merged with other peak)  | 71.96                                           | 71.94                 |
| 14     | 2t        | 3.68-3.77 (m, signal merged with other peak)  | 71.97                                           | 71.98                 |
| 15     | 2u        | 3.47-3.58 (m)                                 | 75.08                                           | 75.11                 |
| 16     | 6/7a & e  | 4.68-4.75 (m) for <b>6a/e</b>                 | 73.83 ( <b>6a/e</b> ),<br>74.18 ( <b>7a/e</b> ) | 73.90 ( <b>6a/e</b> ) |
| 17     | 6/7b & f  | 4.62-4.69 (m) for <b>6b/f</b>                 | 73.59 ( <b>6b/f</b> ),<br>73.93 ( <b>7b/f</b> ) | 73.59 ( <b>6b/f</b> ) |
| 18     | 6/7c & g  | 5.47-5.54 (m) for <b>6c/g</b>                 | 70.47 ( <b>6c/g</b> ),<br>75.81 ( <b>7c/g</b> ) | 70.47 ( <b>6c/g</b> ) |
| 19     | 6/7d & h  | 4.68-4.71 (m) for <b>6d/h</b>                 | 73.24 ( <b>6d/h</b> ),<br>73.86 ( <b>7d/h</b> ) | 73.24 ( <b>6d/h</b> ) |
| 20     | 4a & e    | 4.66-4.69 (t)                                 | 74.29                                           | 74.31                 |
| 21     | 4b & f    | 4.59-4.63 (m)                                 | 73.92                                           | 73.67                 |
| 22     | 4c & g    | 5.42-5.45 (m)                                 | 71.50                                           | 71.60                 |
| 23     | 4d & h    | 4.60-4.64 (t)                                 | 73.65                                           | 73.66                 |
| 24     | 1l        | 4.61-4.88 (q)                                 | 69.86                                           | 69.87                 |

Table 5: Chemical shift value of CH-Ar & CH-Alkyl

## 2.1 Scanned spectra of compounds:

### <sup>1</sup>H NMR for tetrahydro-2-phenylfuran in CDCl<sub>3</sub> (Table 2, entry a, b and n)

Mar22-2011-purnima  
BER

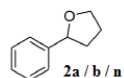

Mar22-2011-purnima  
BER

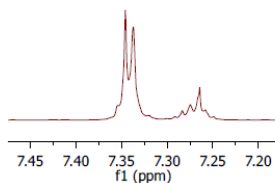

Mar22-2011-purnima  
BER

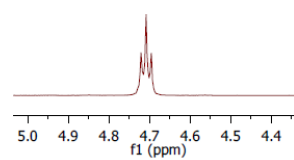

Mar22-2011-purnima  
BER

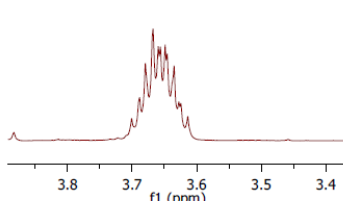

Mar22-2011-purnima  
BER

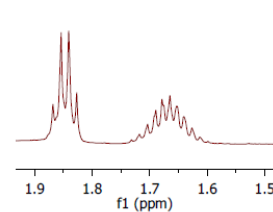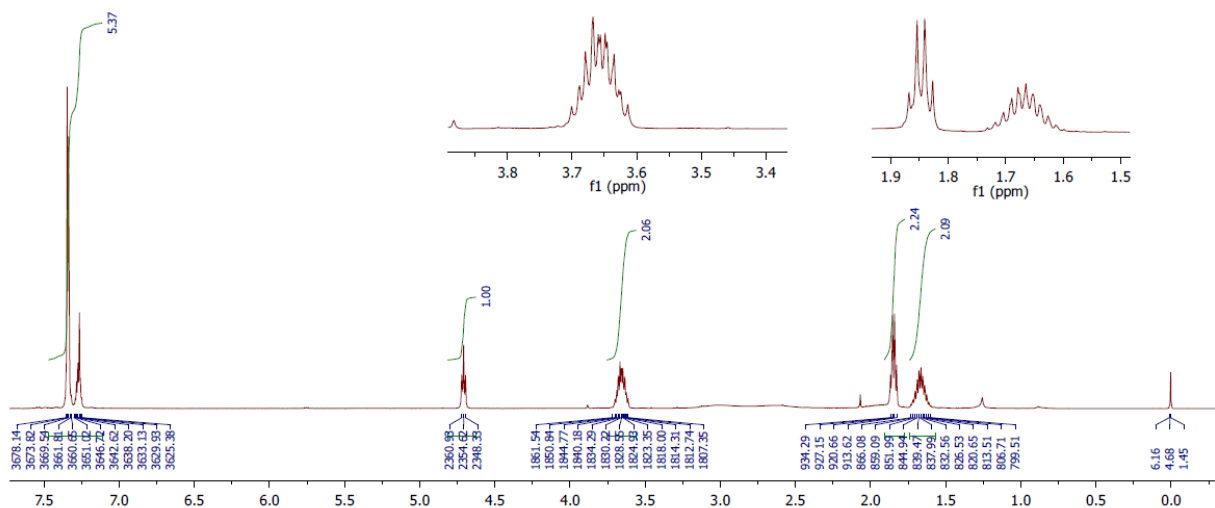

### <sup>13</sup>C NMR for tetrahydro-2-phenylfuran in CDCl<sub>3</sub> (Table 2, entry a, b and n)

Oct19-2010-purnima  
Br

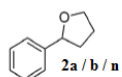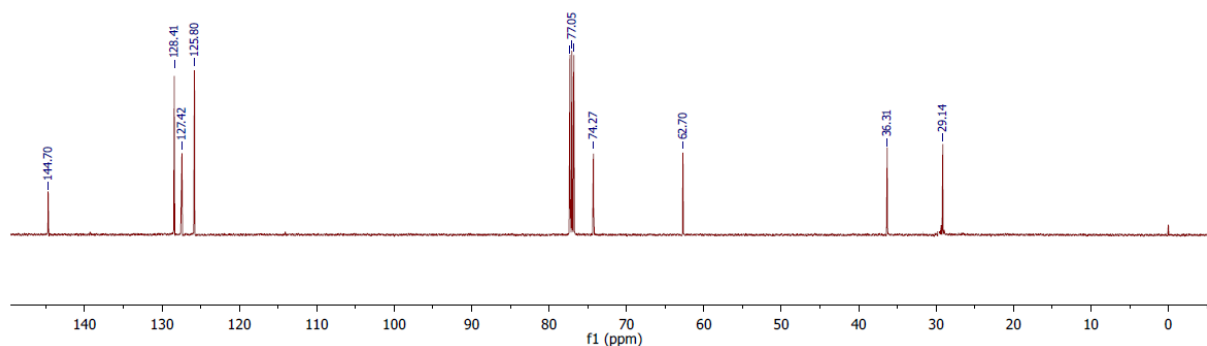

## DEPT at 135 for tetrahydro-2-phenylfuran in CDCl<sub>3</sub> (Table 2, entry a, b and n)

Oct19-2010-purnima  
3r

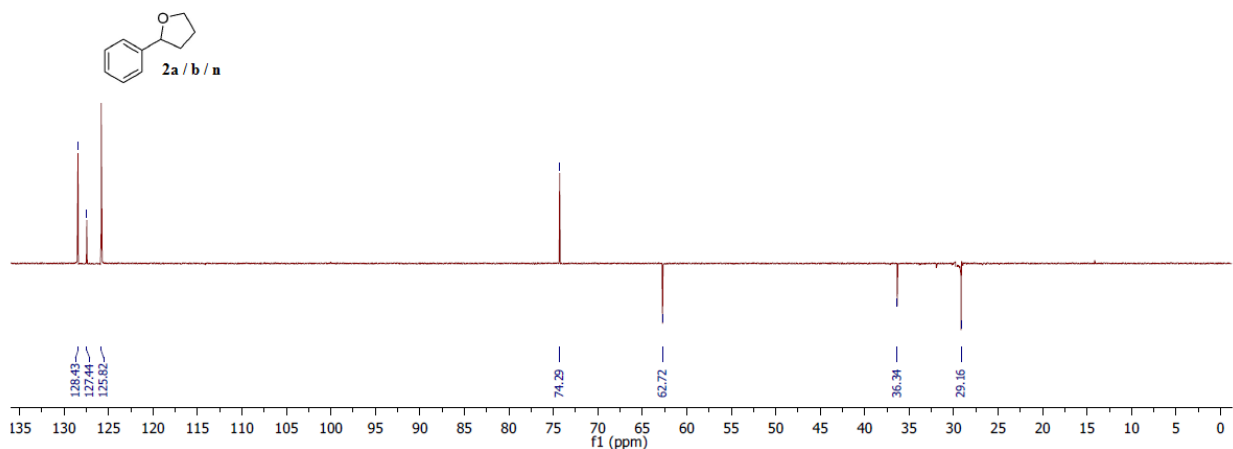

## GCMS for tetrahydro-2-phenylfuran (Table 2, entry a, b and n)

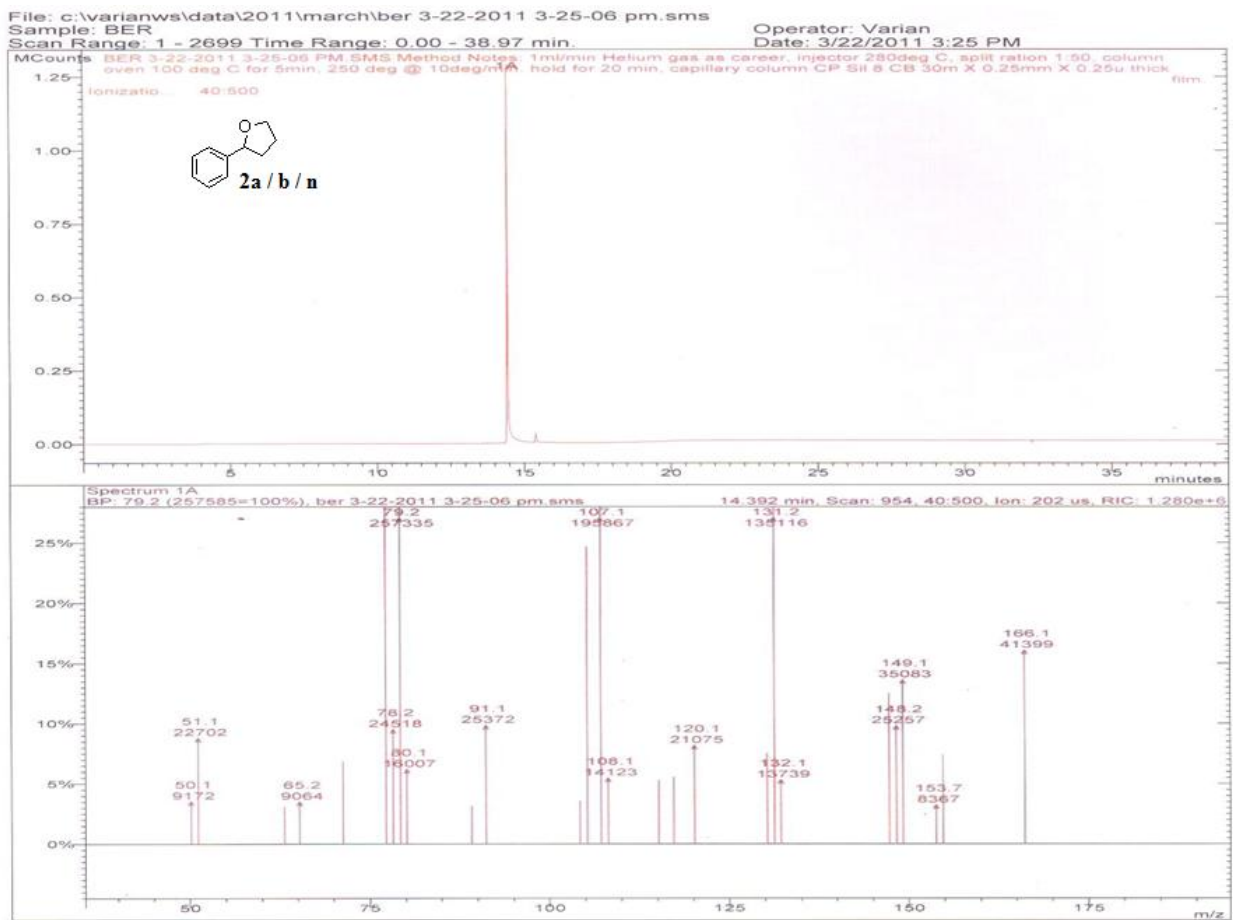



## DEPT at 135 for tetrahydro-2-(4-methoxyphenyl)furan in CDCl<sub>3</sub> (Table 2, entry c, d and o)

Oct19-2010-pumima  
Coup

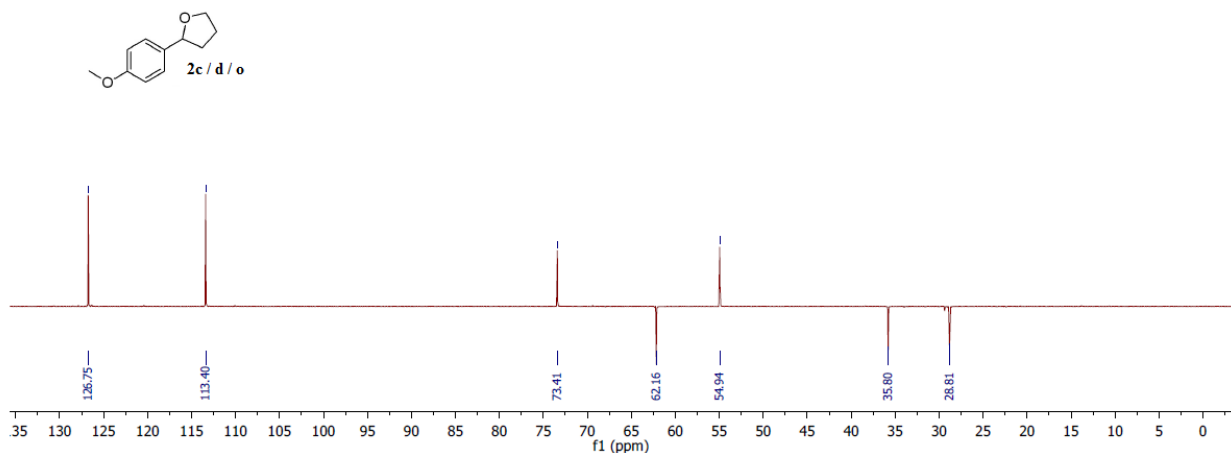

## GCMS for tetrahydro-2-(4-methoxyphenyl)furan (Table 2, entry c, d and o)

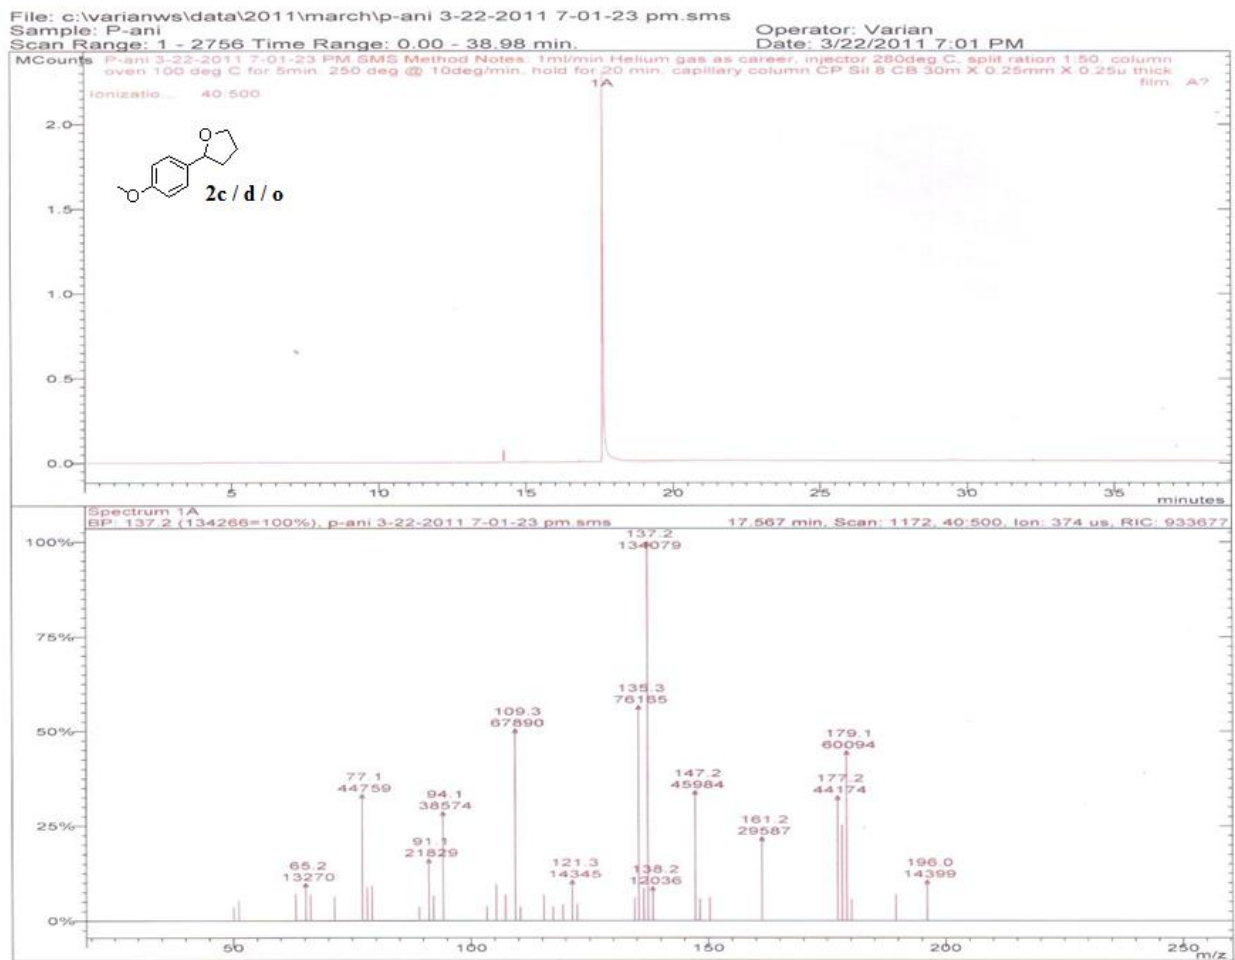

# **<sup>1</sup>H NMR for tetrahydro-2-(2-methoxyphenyl)furan in CDCl<sub>3</sub> (Table 2, entry e)**

Dec13-2010-pumimaj  
OANI

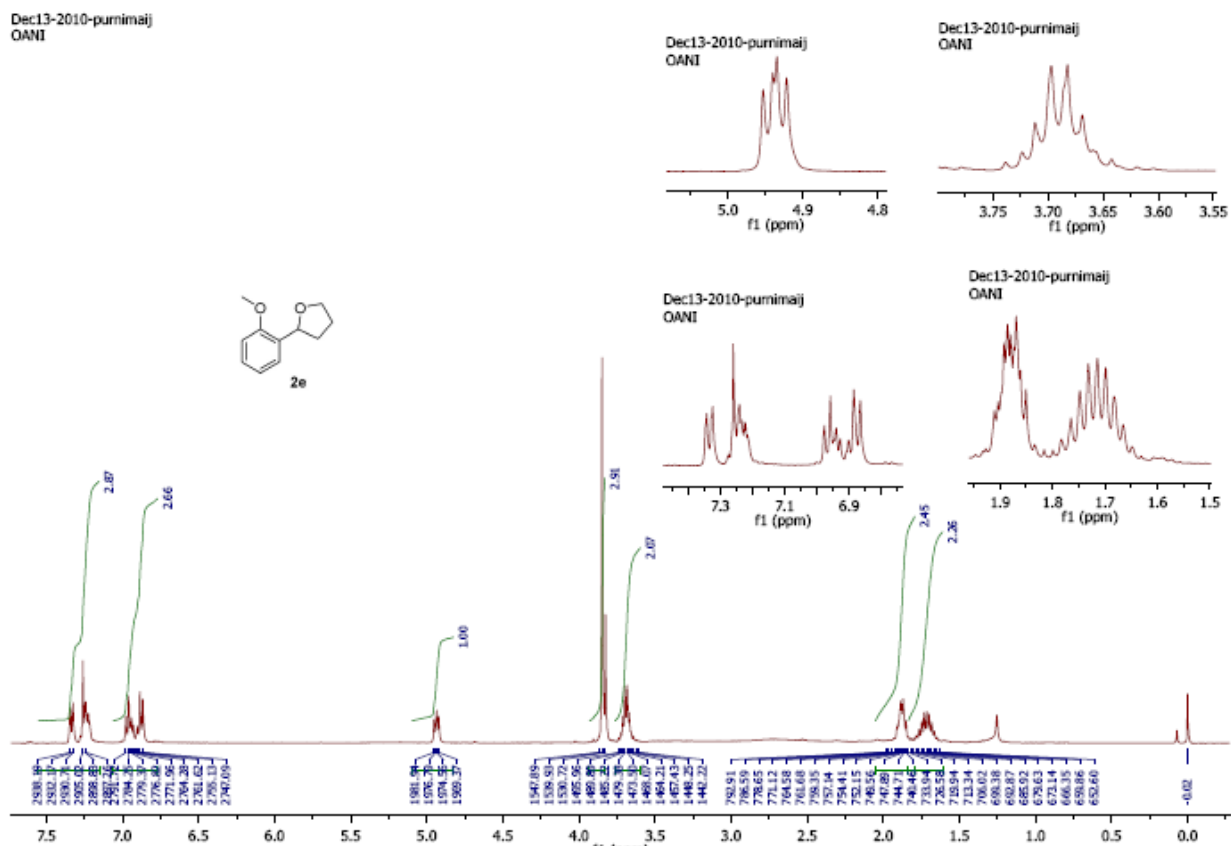

# **<sup>13</sup>C NMR for tetrahydro-2-(2-methoxyphenyl)furan in CDCl<sub>3</sub> (Table 2, entry e)**

Jan28-2011-pumima  
OANI

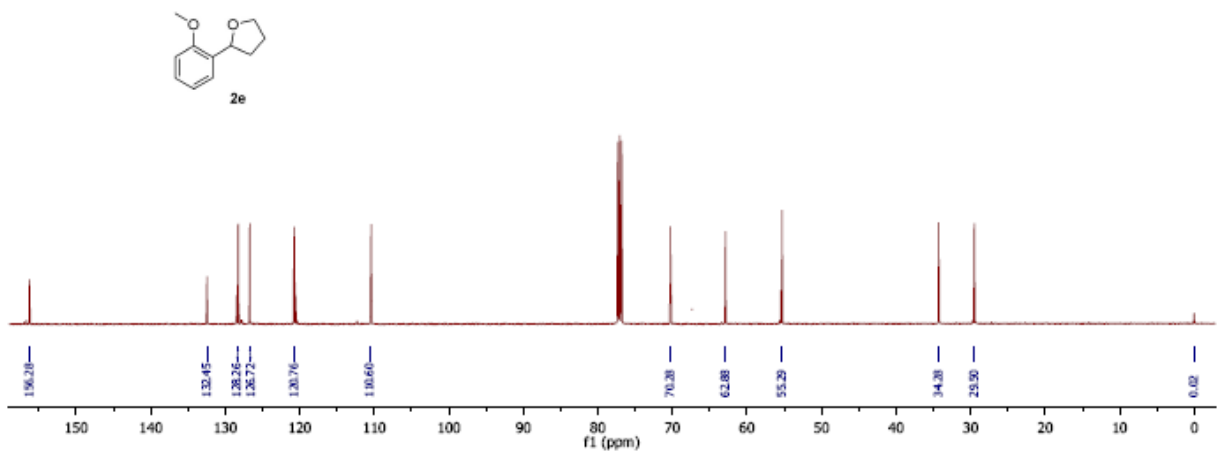



## DEPT at 135 for tetrahydro-2-(2-methoxyphenyl)furan in CDCl<sub>3</sub> (Table 2, entry e)

Jan28-2011-pumima  
QANI

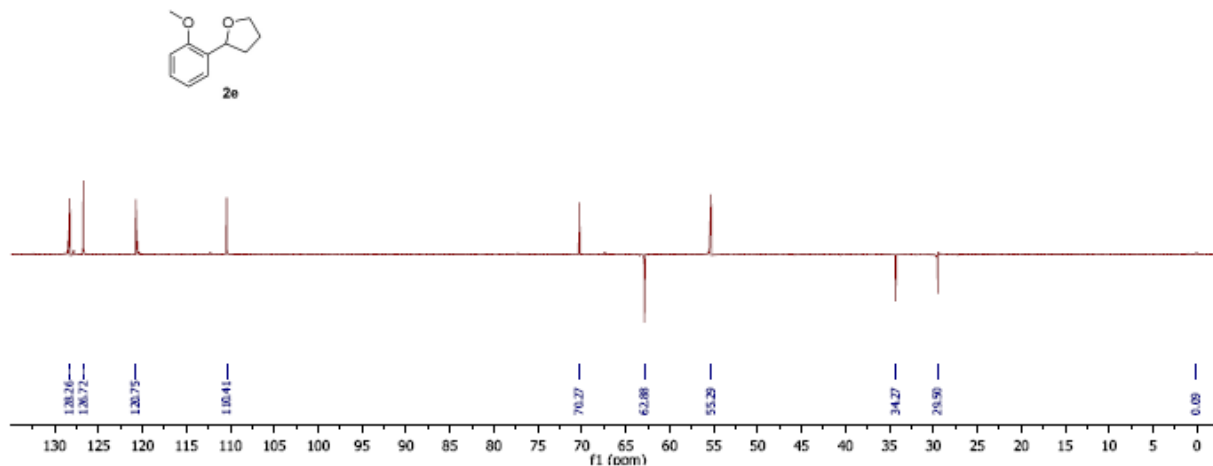

## GCMS for tetrahydro-2-(2-methoxyphenyl)furan (Table 2, entry e)

File: c:\varianws\data\2011\march\p-ani 3-22-2011 7-01-23 pm.sms

Sample: 6-ani

Operator: Varian

Date: 3/22/2011 7:01 PM

Scan Range: 1 - 2756 Time Range: 0.00 - 38.98 min.

Method: P-ani 3-22-2011 7-01-23 PM SMS Method Notes: 1ml/min Helium gas as carrier, injector 250deg C, split ratio 1:50, column oven 100 deg C for 5min, 250 deg @ 10deg/min, hold for 20 min, capillary column CP Sil 8 CB 30m X 0.25mm X 0.25u thick.

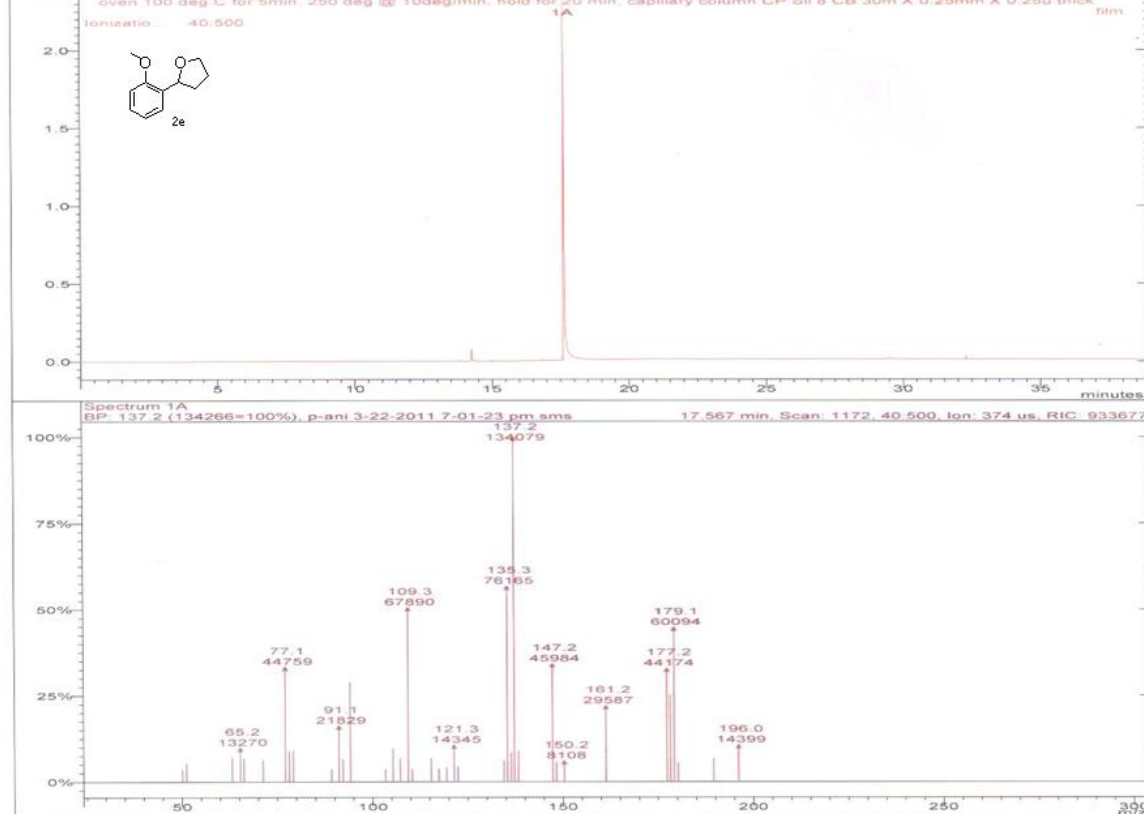

# <sup>1</sup>H NMR for tetrahydro-2-(3-methoxyphenyl)furan in CDCl<sub>3</sub> (Table 2, entry f)

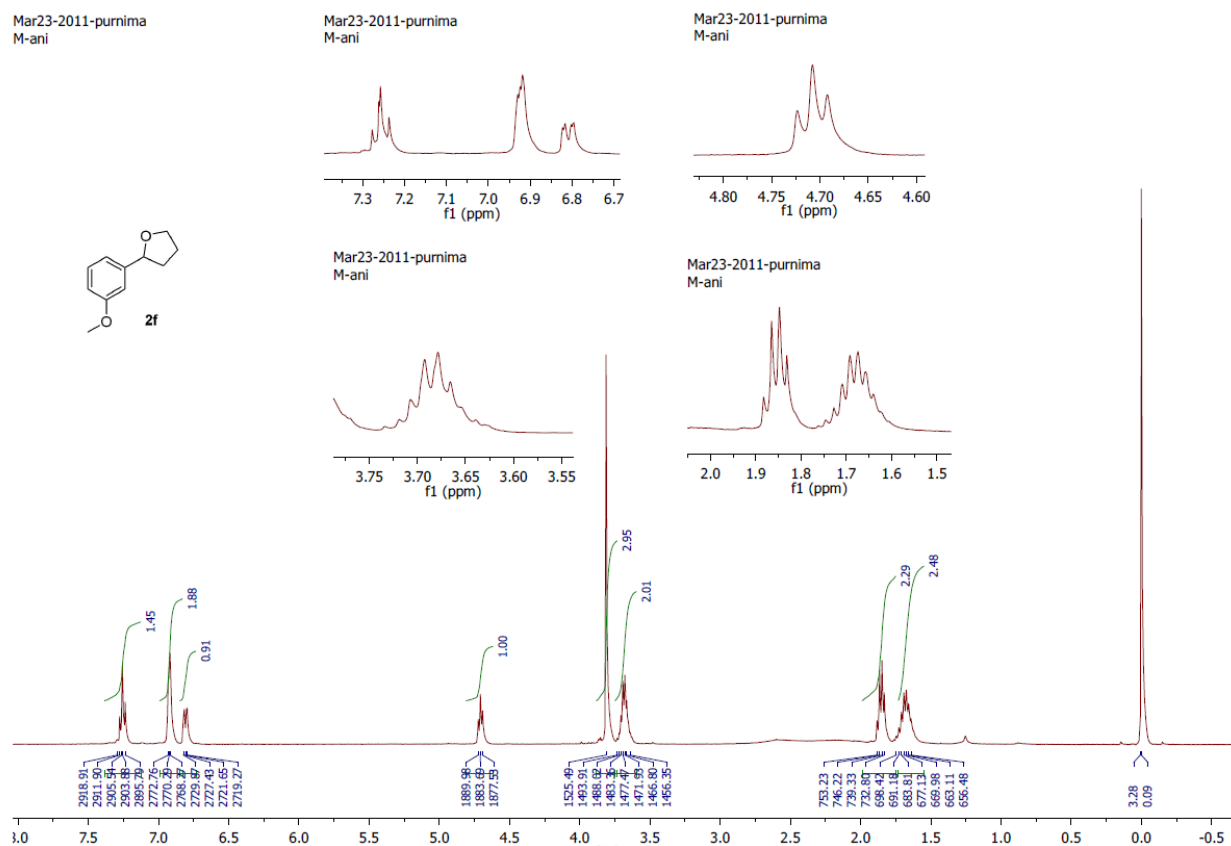

# <sup>13</sup>C NMR for tetrahydro-2-(3-methoxyphenyl)furan in CDCl<sub>3</sub> (Table 2, entry f)

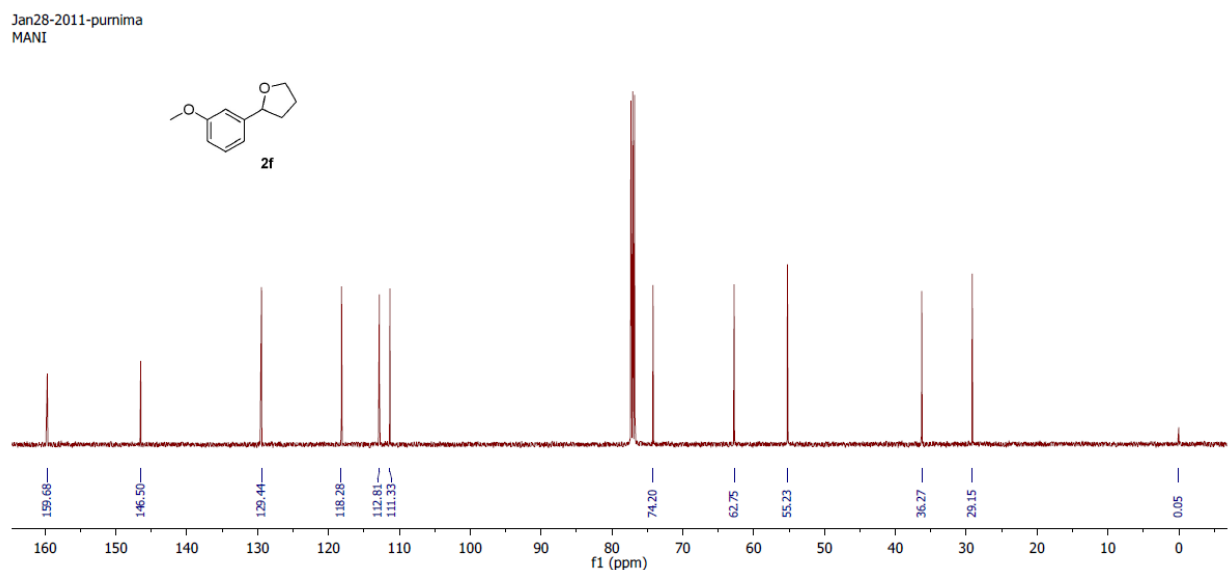

## DEPT at 135 for tetrahydro-2-(3-methoxyphenyl)furan in CDCl<sub>3</sub> (Table 2, entry f)

Jan28-2011-purnima  
MANI

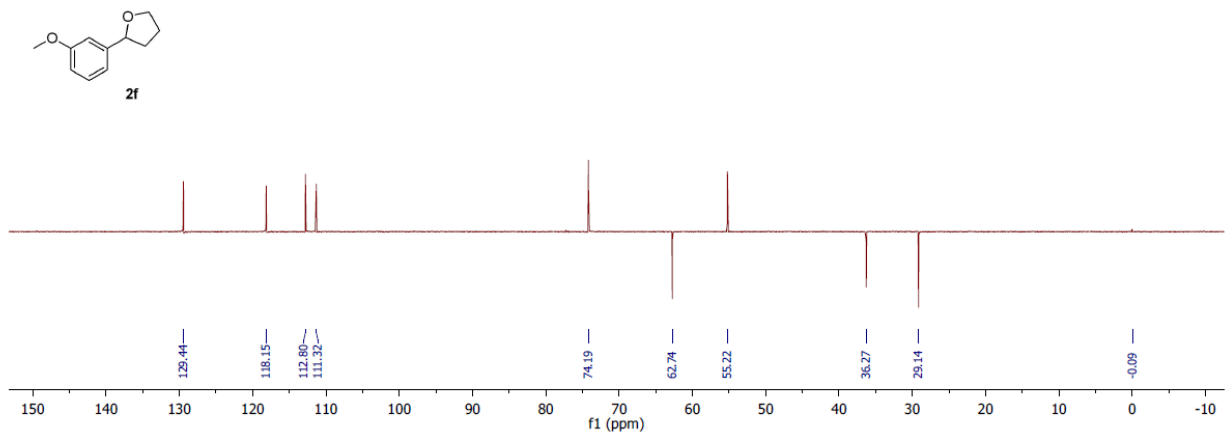

## GCMS for tetrahydro-2-(3-methoxyphenyl)furan (Table 2, entry f)

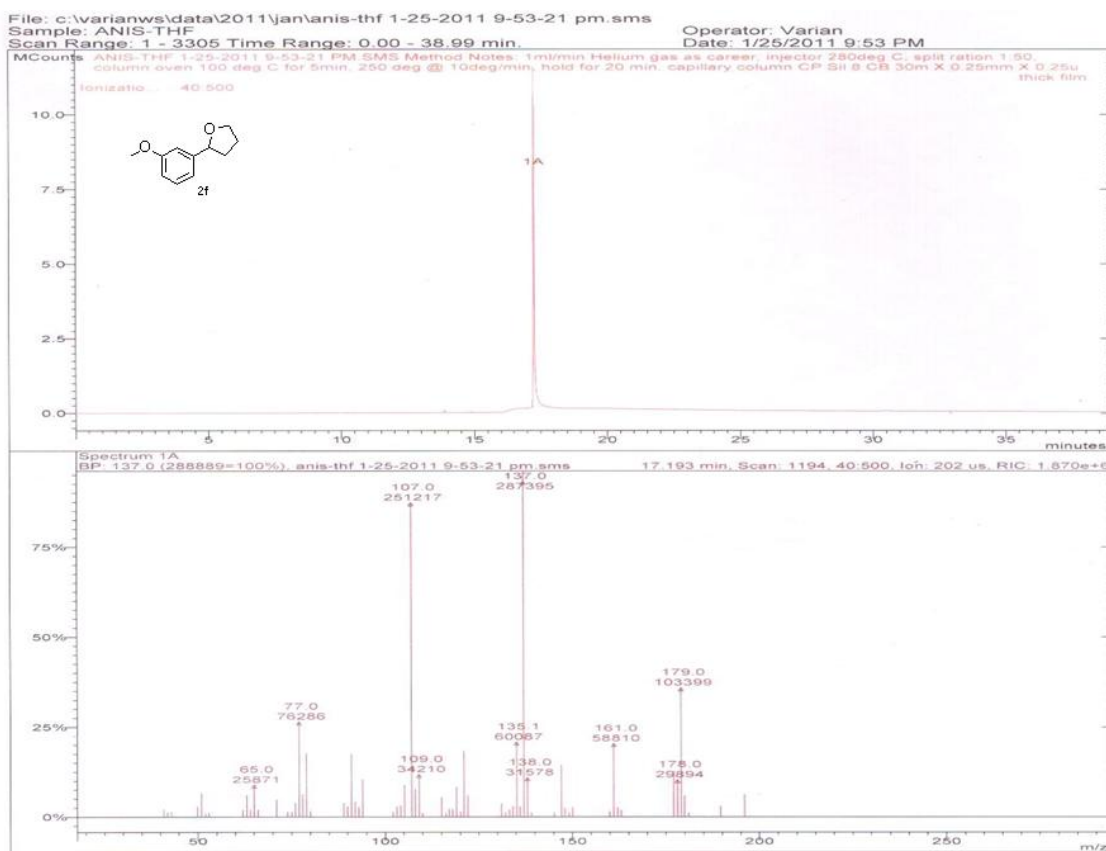

# <sup>1</sup>H NMR for tetrahydro-2-*p*-tolylfuran in CDCl<sub>3</sub> (Table 2, entry g and p)

Mar23-2011-purnima  
p-TOL

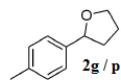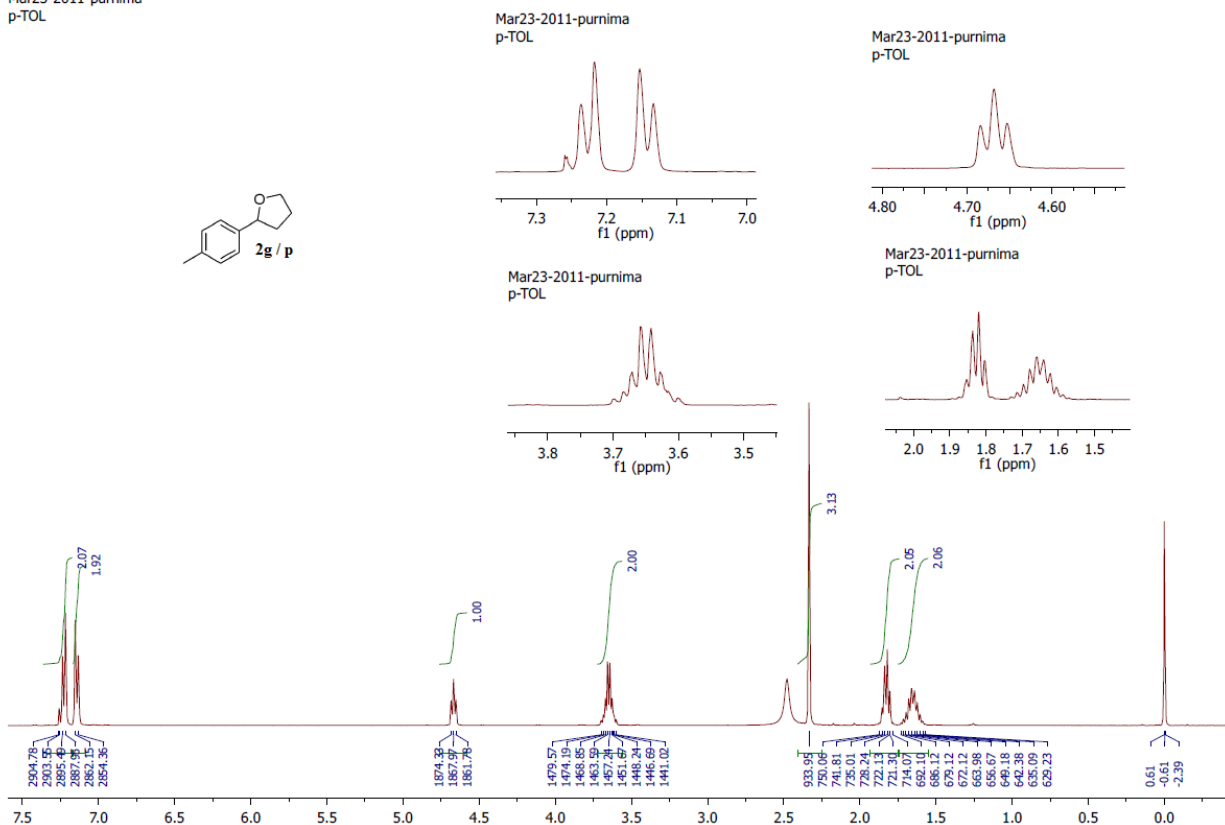

# <sup>13</sup>C NMR for tetrahydro-2-*p*-tolylfuran in CDCl<sub>3</sub> (Table 2, entry g and p)

Mar23-2011-purnima  
p-TOL

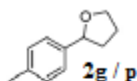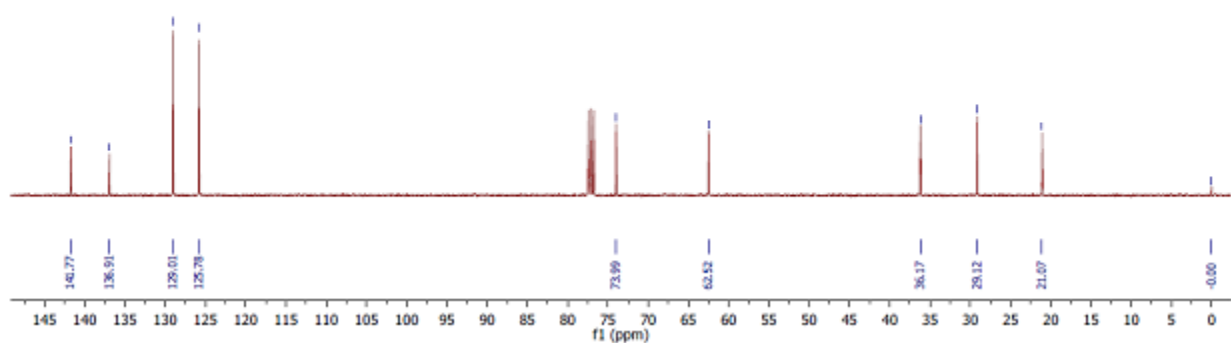

# DEPT at 135 for tetrahydro-2-*p*-tolylfuran in CDCl<sub>3</sub> (Table 2, entry g and p)

Mar23-2011-pumima  
p-TOL

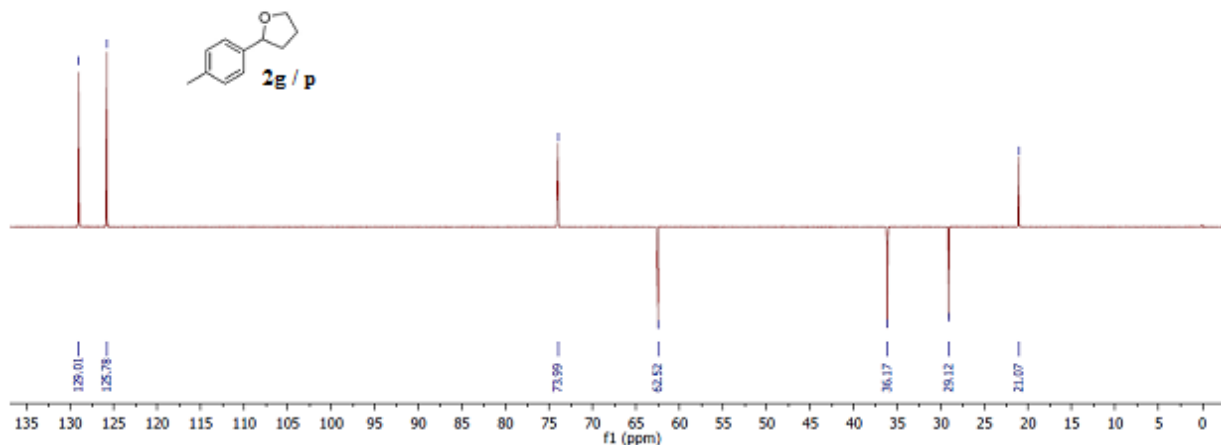

# GCMS for tetrahydro-2-*p*-tolylfuran (Table 2, entry g and p)

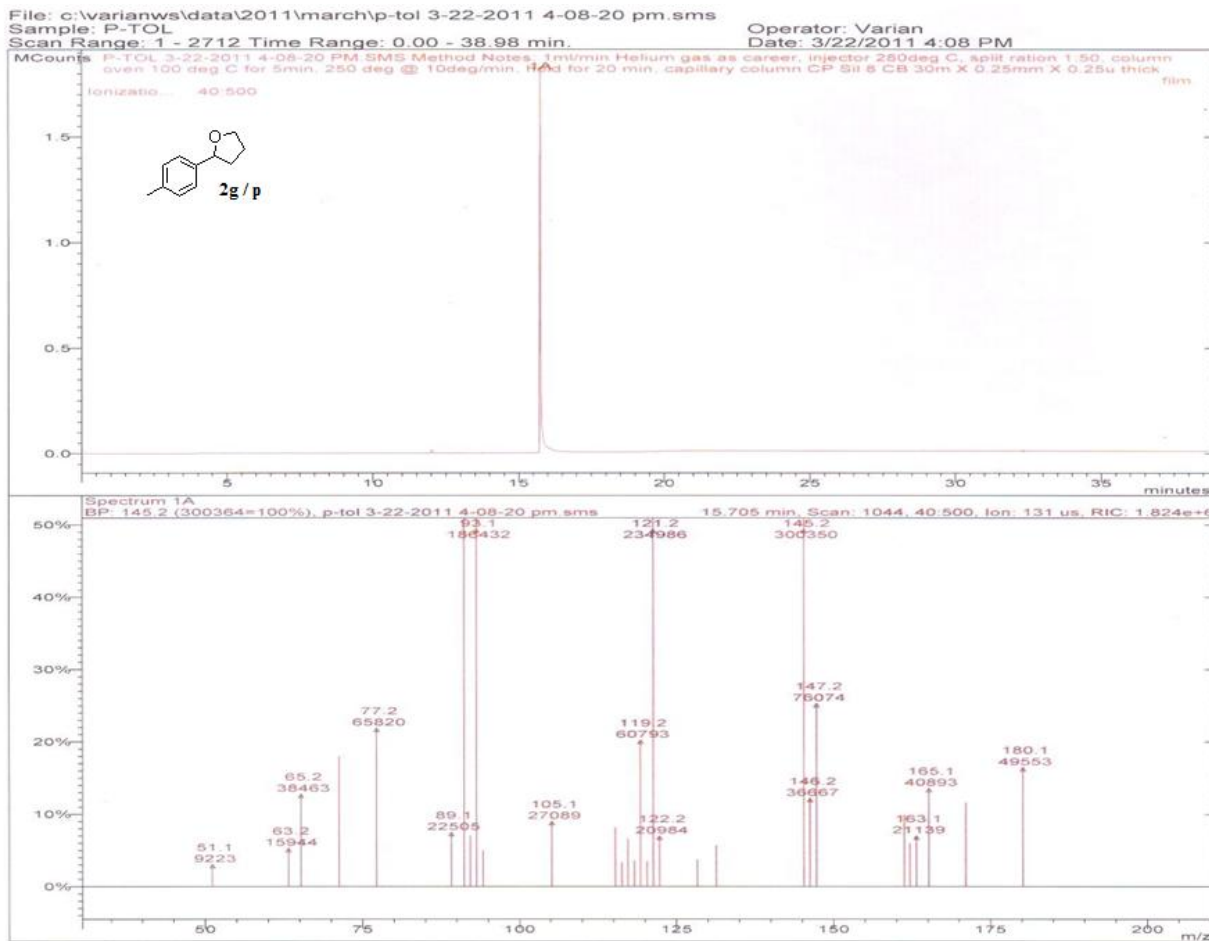

# **<sup>1</sup>H NMR for 2-(4-*tert*-butylphenyl)-tetrahydrofuran in CDCl<sub>3</sub> (Table 2, entry h and q)**

Dec13-2010-purnimaij  
OBT

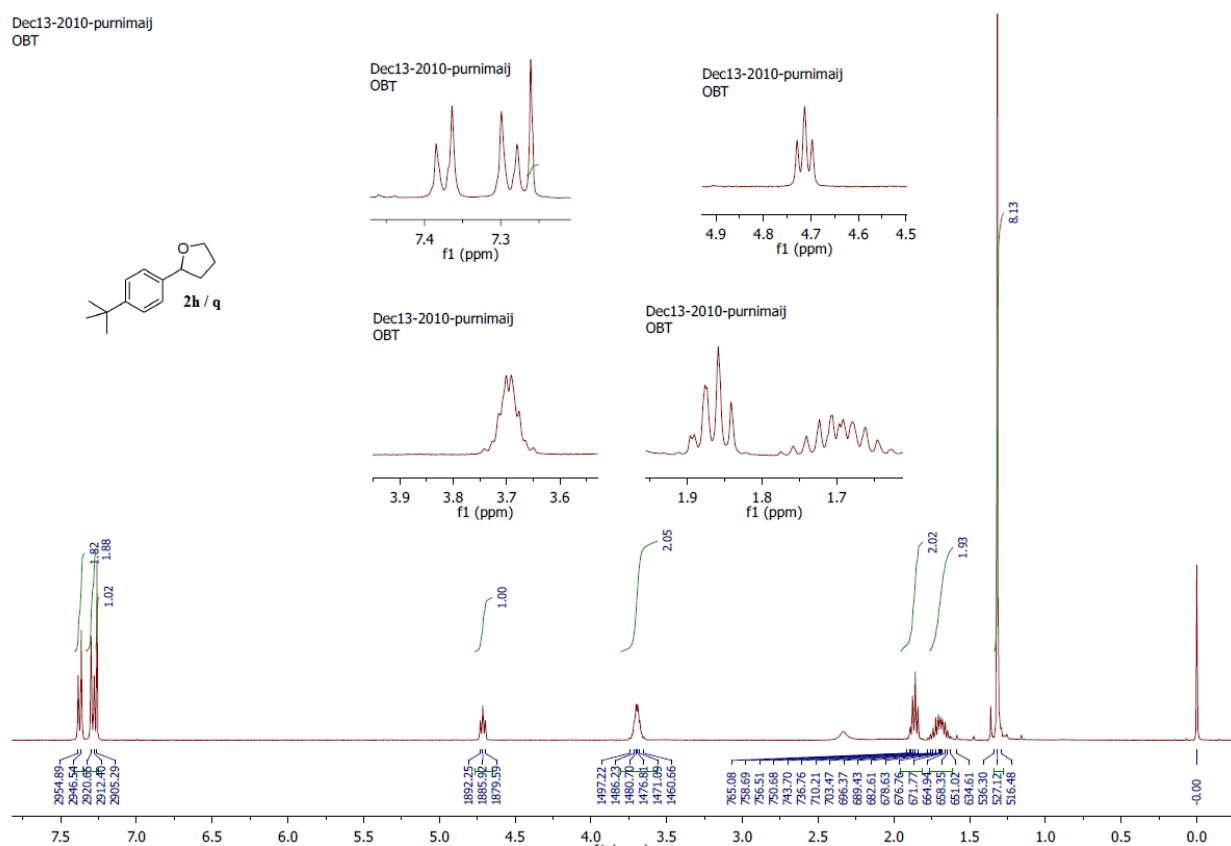

# **<sup>13</sup>C NMR for 2-(4-*tert*-butylphenyl)-tetrahydrofuran in CDCl<sub>3</sub> (Table 2, entry h and q)**

Dec08-2010-purnima  
4 BT

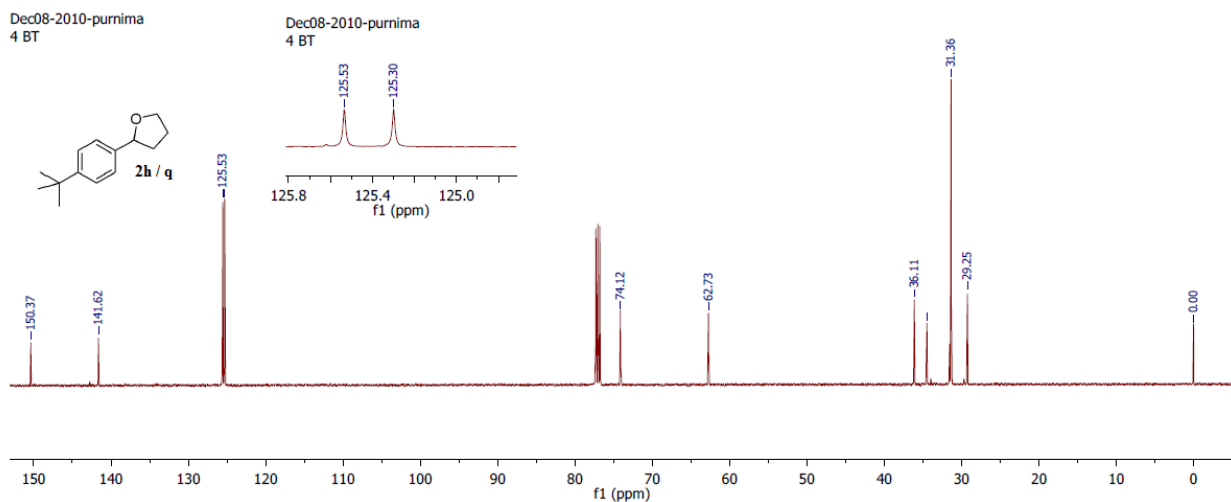

# DEPT at 135 for 2-(4-*tert*-butylphenyl)-tetrahydrofuran in CDCl<sub>3</sub> (Table 2, entry h and q)

Dec08-2010-purnima  
4 BT

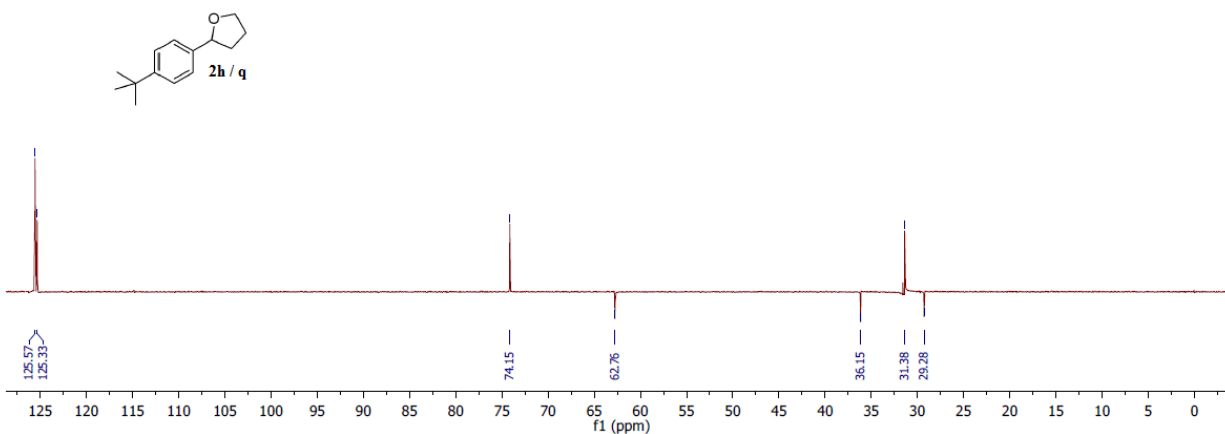

# GCMS for 2-(4-*tert*-butylphenyl)-tetrahydrofuran (Table 2, entry h and q)

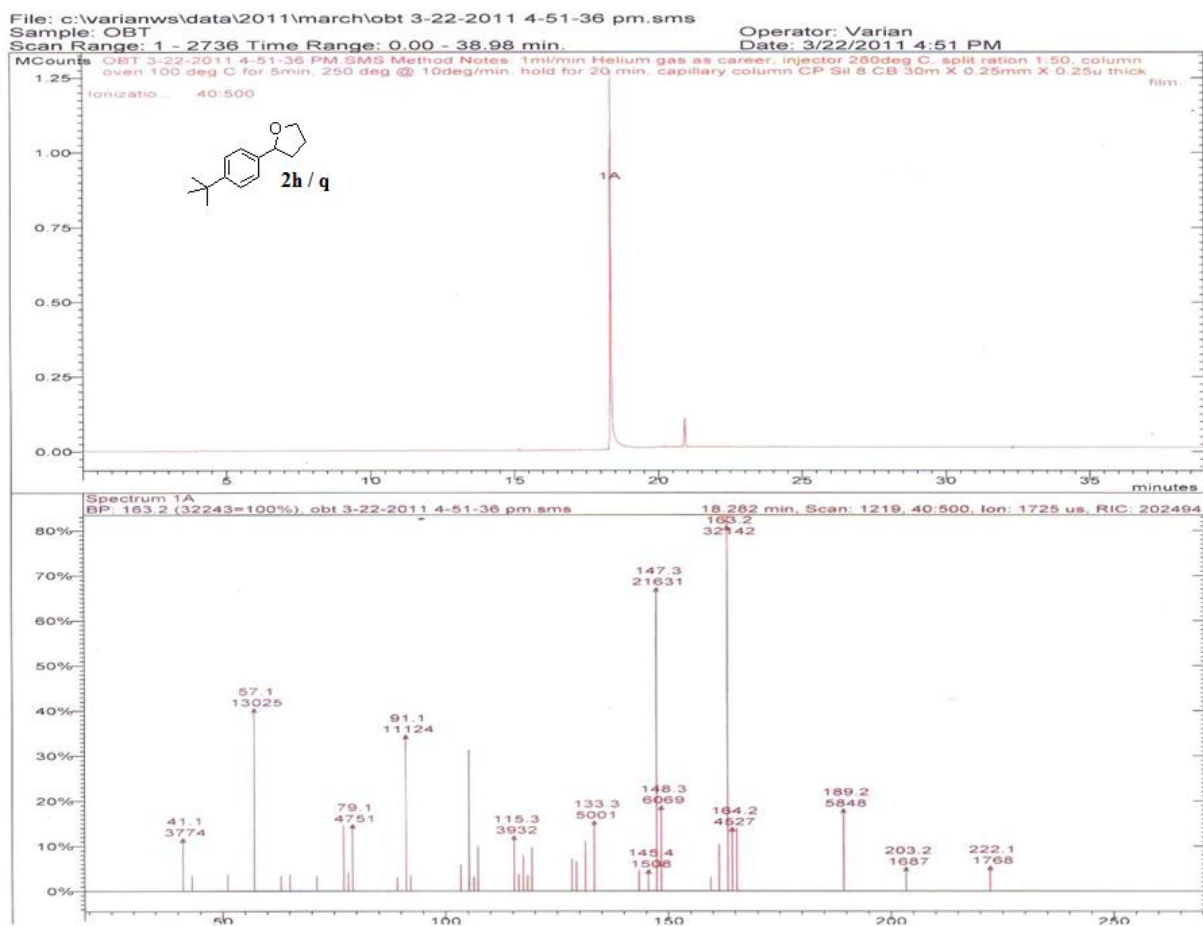

# **<sup>1</sup>H NMR for 2-(4-chlorophenyl)-tetrahydrofuran in CDCl<sub>3</sub> (Table 2, entry i)**

Mar23-2011-purnima  
P-Cl

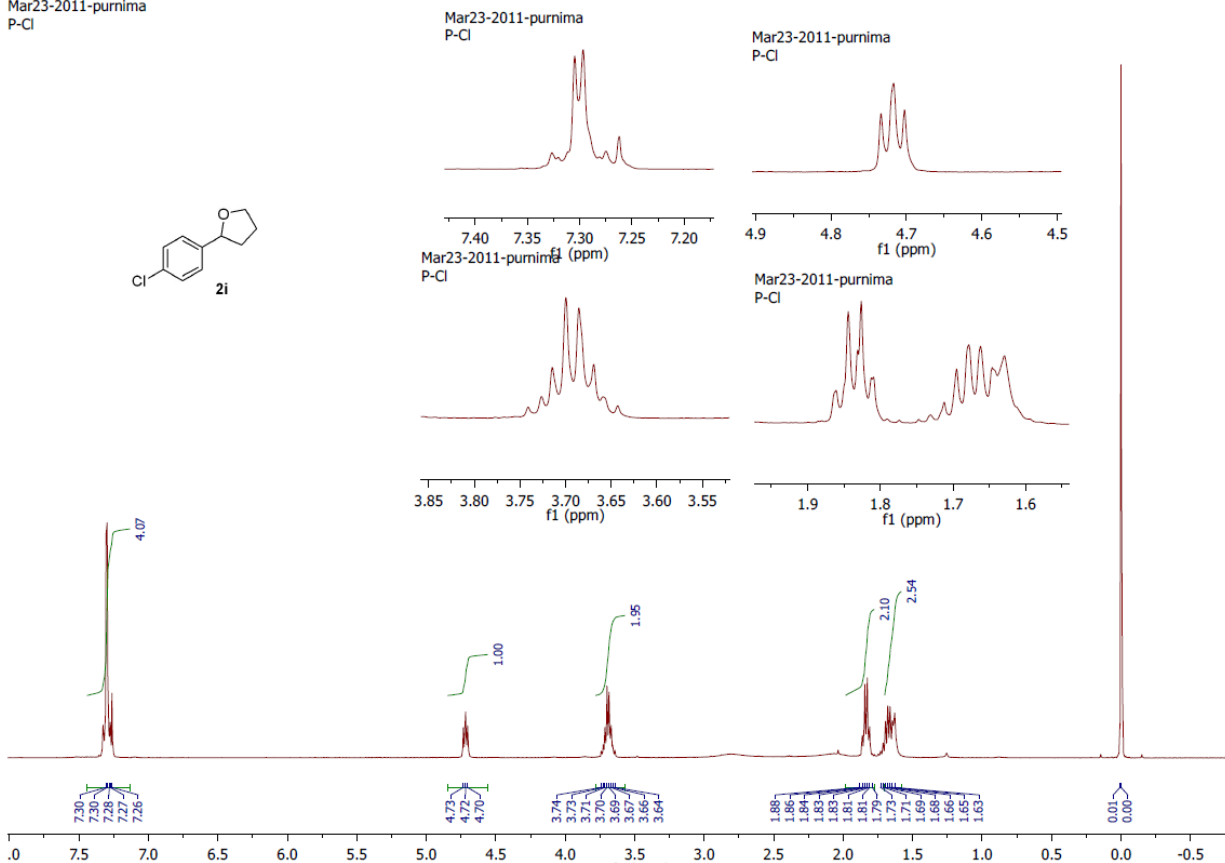

# **<sup>13</sup>C NMR for 2-(4-chlorophenyl)-tetrahydrofuran in CDCl<sub>3</sub> (Table 2, entry i)**

Jan27-2011-purnima  
cl-th-1

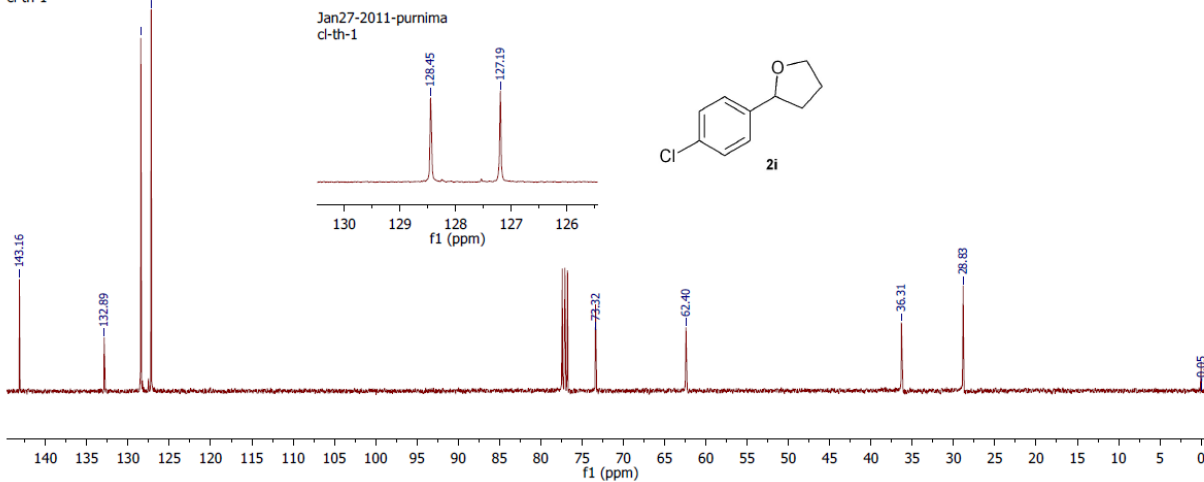



## DEPT at 135 for 2-(4-chlorophenyl)-tetrahydrofuran in CDCl<sub>3</sub> (Table 2, entry i)

Jan27-2011-pumima  
cl-th-1

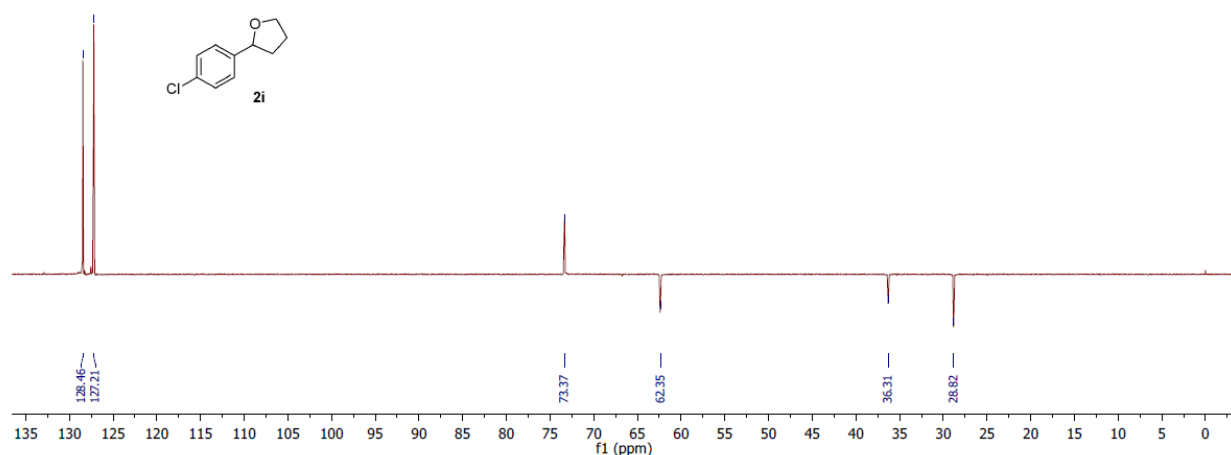

## GCMS for 2-(4-chlorophenyl)-tetrahydrofuran (Table 2, entry i)

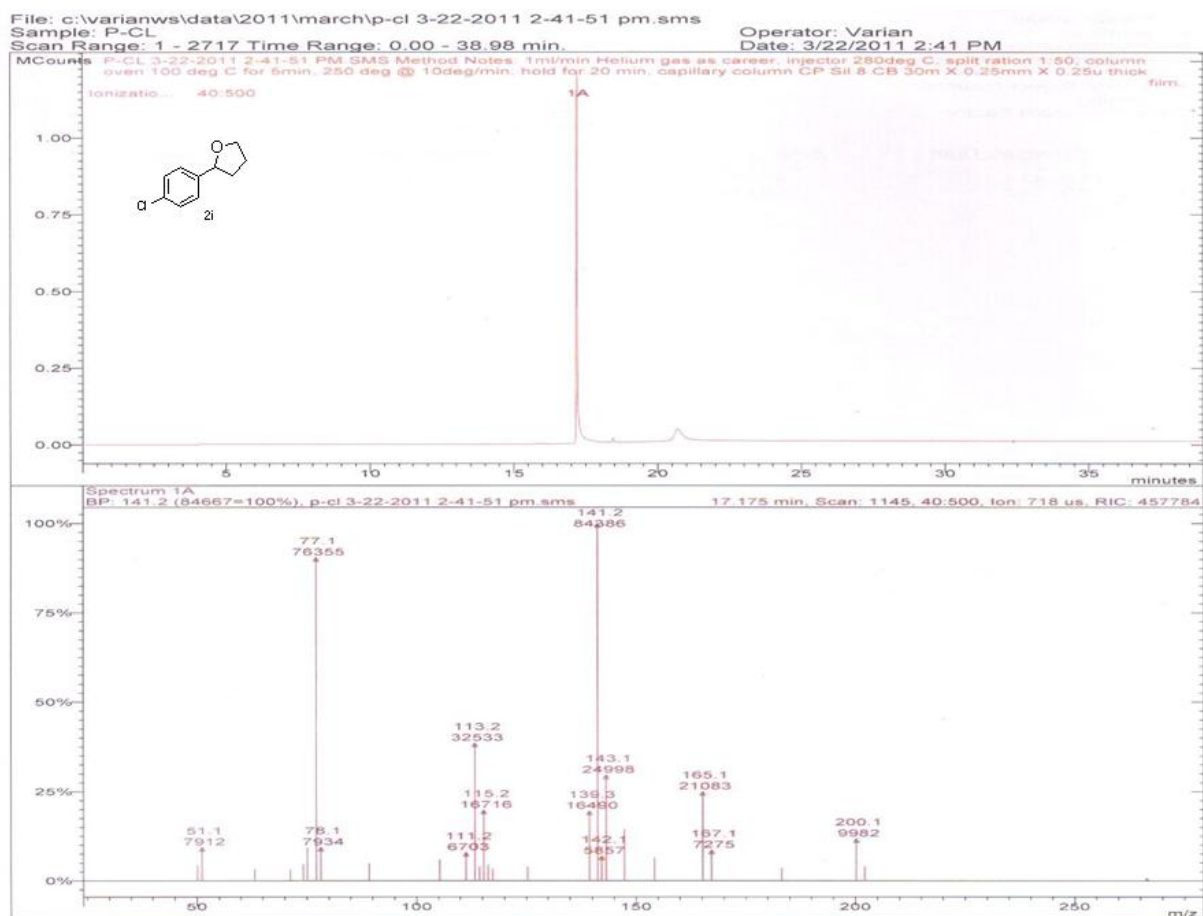

# <sup>1</sup>H NMR for 2-(3-Chlorophenyl)-tetrahydrofuran in CDCl<sub>3</sub> (Table 2, entry j)

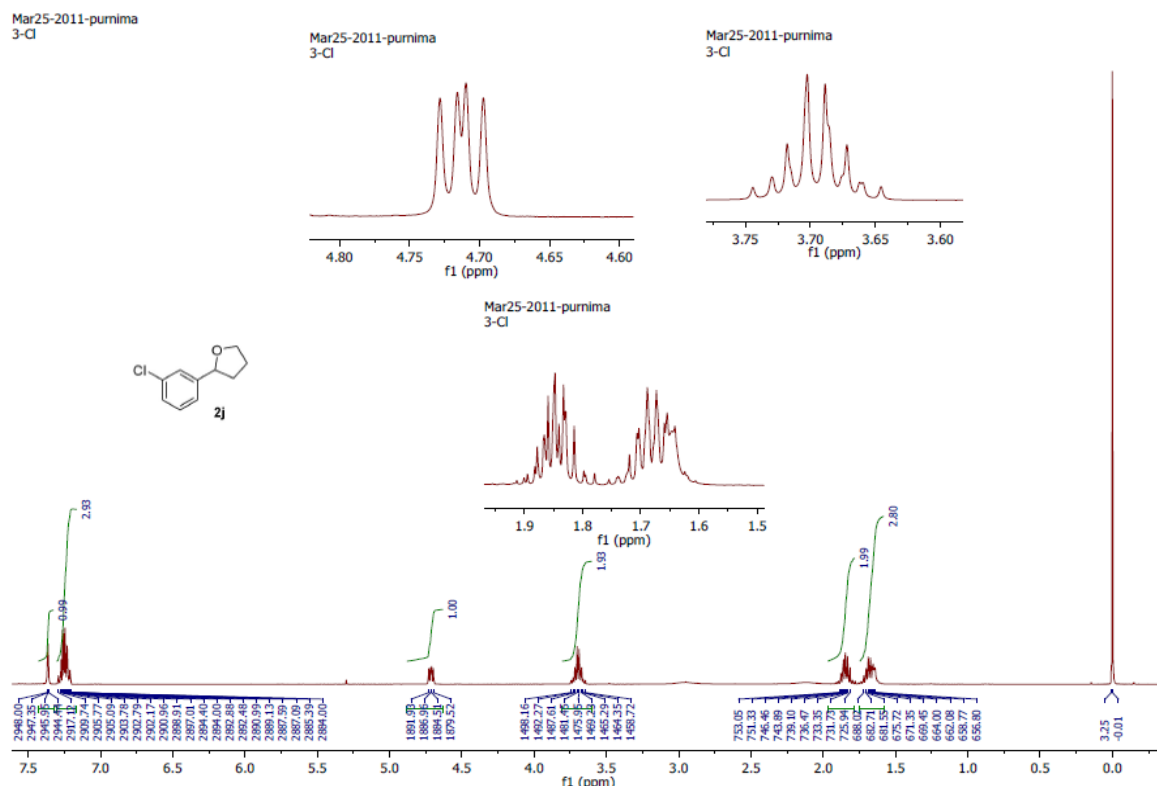

# <sup>13</sup>C NMR for 2-(3-Chlorophenyl)-tetrahydrofuran in CDCl<sub>3</sub> (Table 2, entry j)

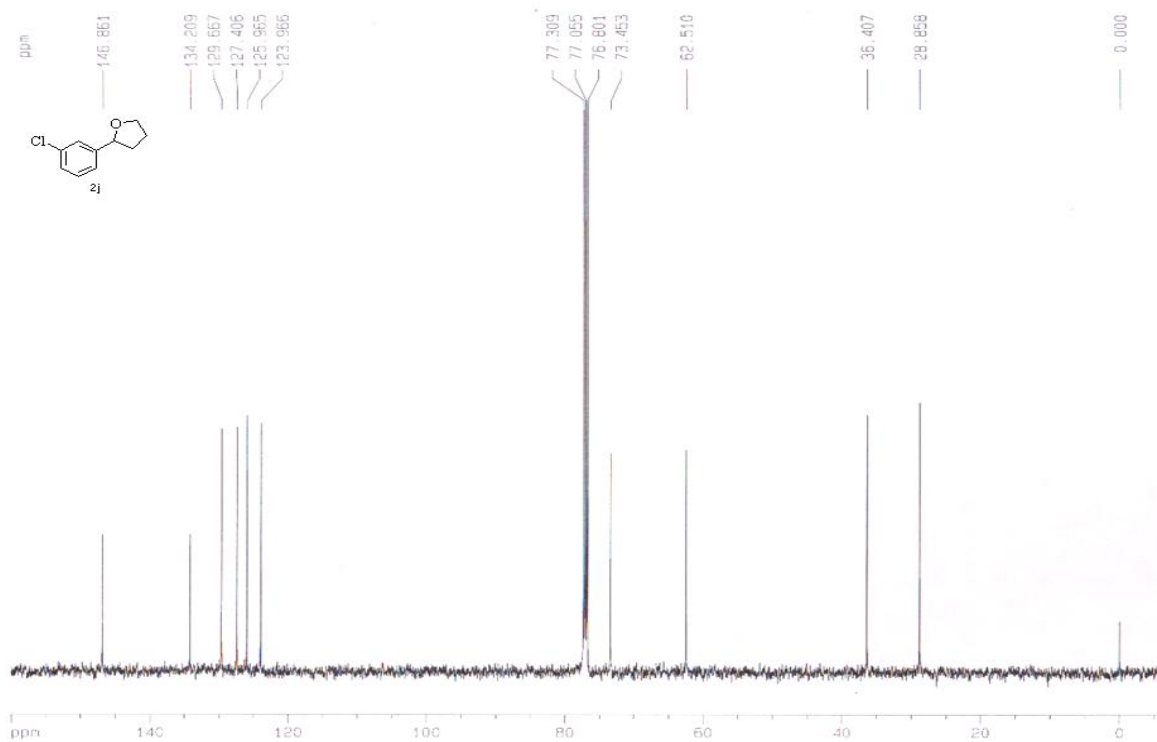

# GCMS for 2-(3-Chlorophenyl)-tetrahydrofuran (Table 2, entry j)

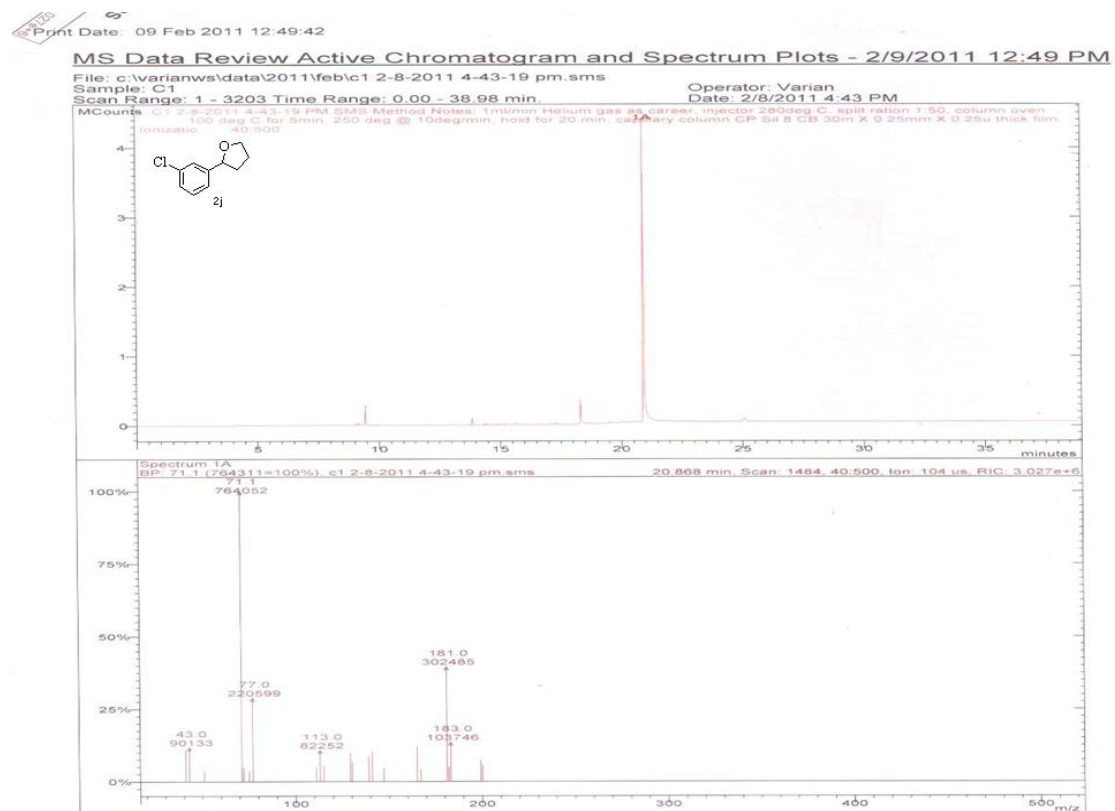

# **<sup>1</sup>H NMR for 2-(3,5-difluorophenyl)-tetrahydrofuran in CDCl<sub>3</sub> (Table 2, entry k)**

Mar23-2011-purnima  
dIFI

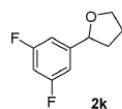

Mar23-2011-purnima  
dIFI

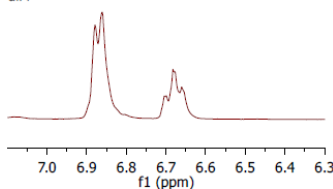

Mar23-2011-purnima  
dIFI

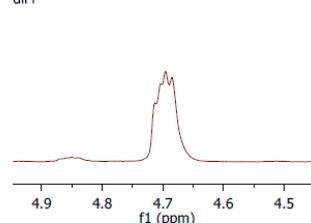

Mar23-2011-purnima  
dIFI

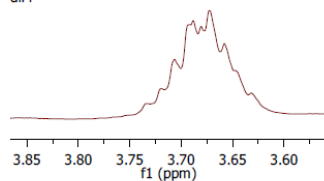

Mar23-2011-purnima  
dIFI

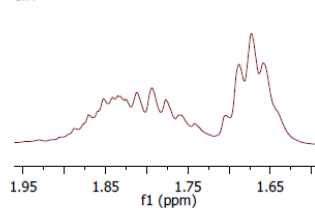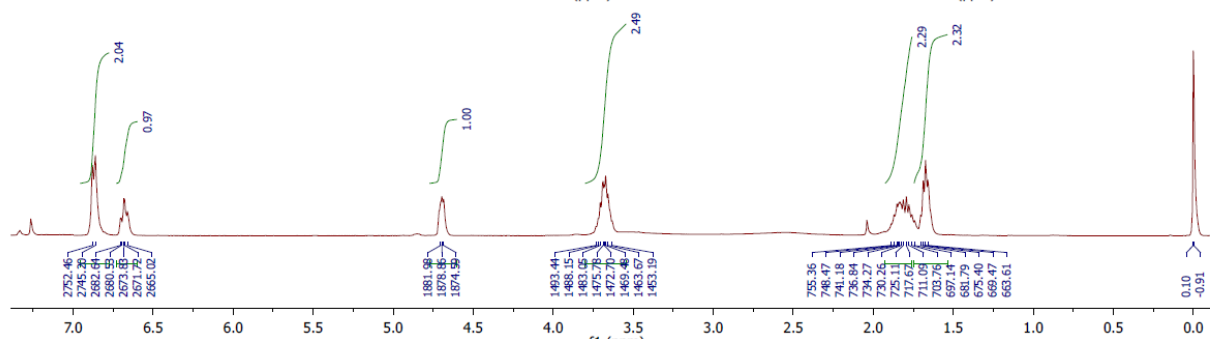

# **<sup>13</sup>C NMR for 2-(3,5-difluorophenyl)-tetrahydrofuran in CDCl<sub>3</sub> (Table 2, entry k)**

Mar23-2011-purnima  
DIFL

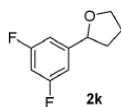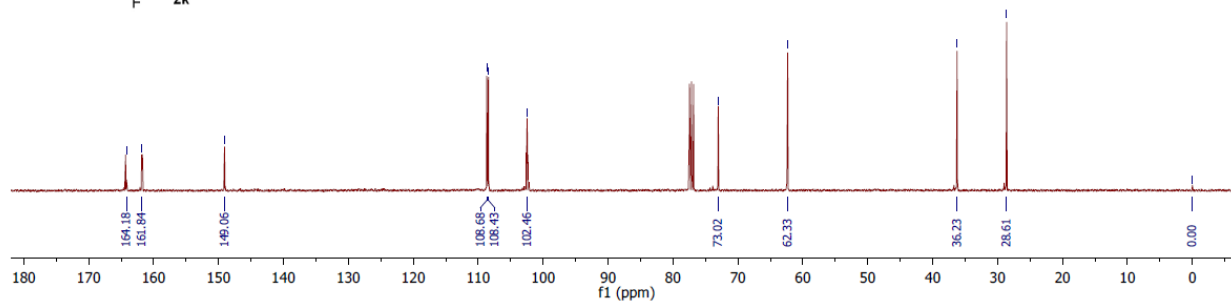

# DEPT at 135 for 2-(3,5-difluorophenyl)-tetrahydrofuran in CDCl<sub>3</sub> (Table 2, entry k)

Mar23-2011-purnima  
DIFL

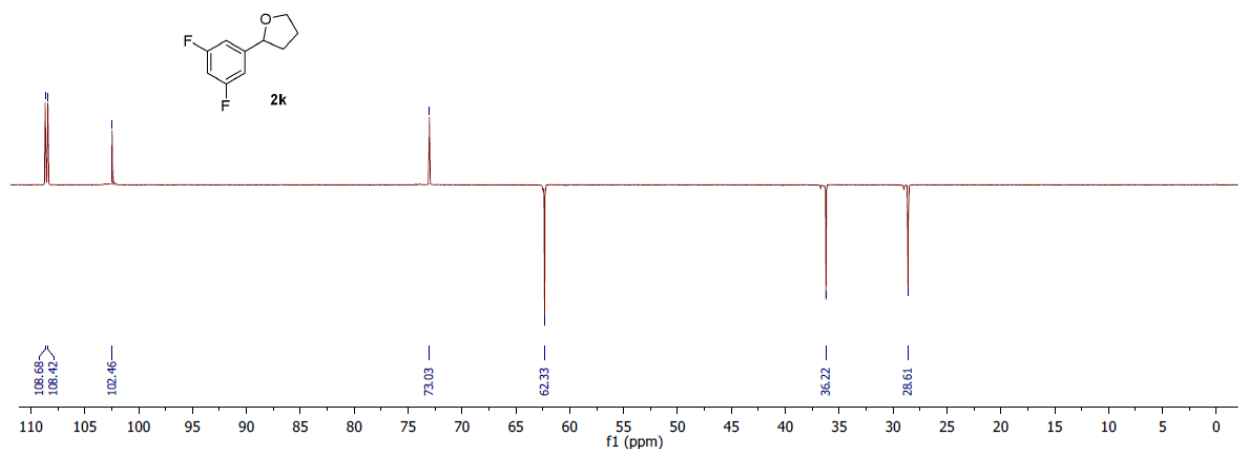

# GCMS for 2-(3,5-difluorophenyl)-tetrahydrofuran (Table 2, entry k)

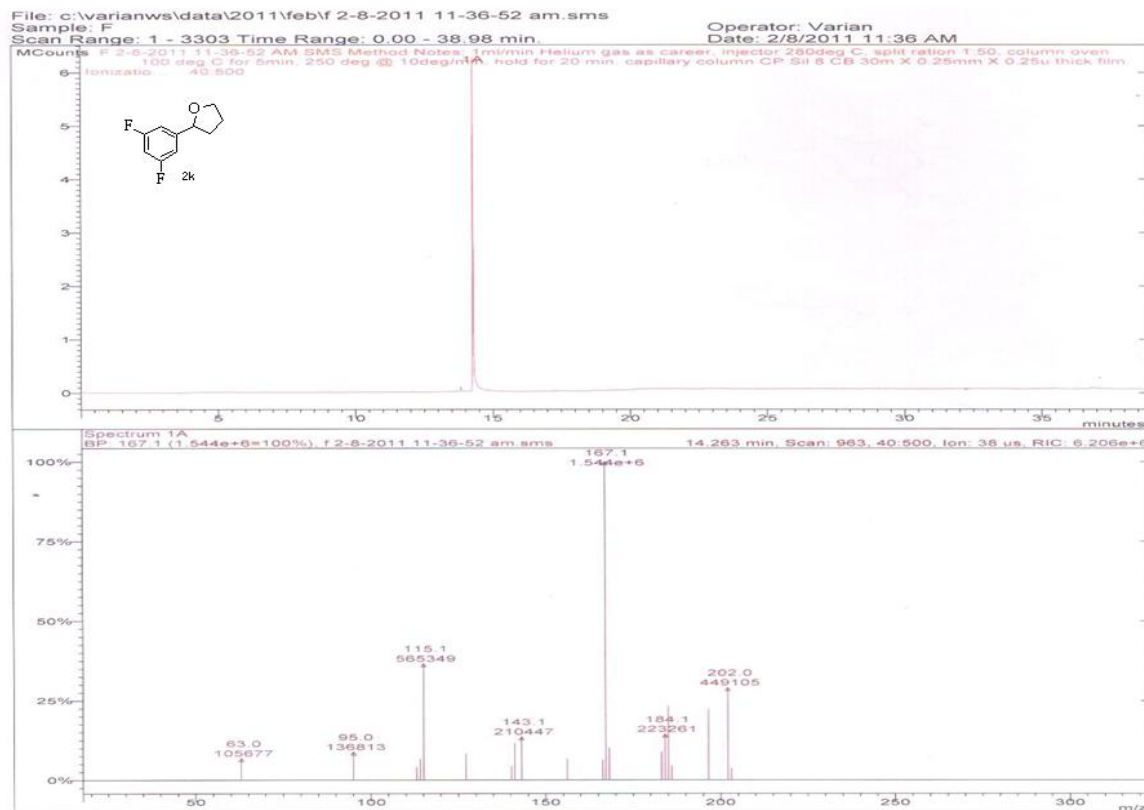

# **<sup>1</sup>H NMR for tetrahydro-2-(naphthalen-4-yl)furan in CD<sub>3</sub>OD (Table 2, entry 1)**

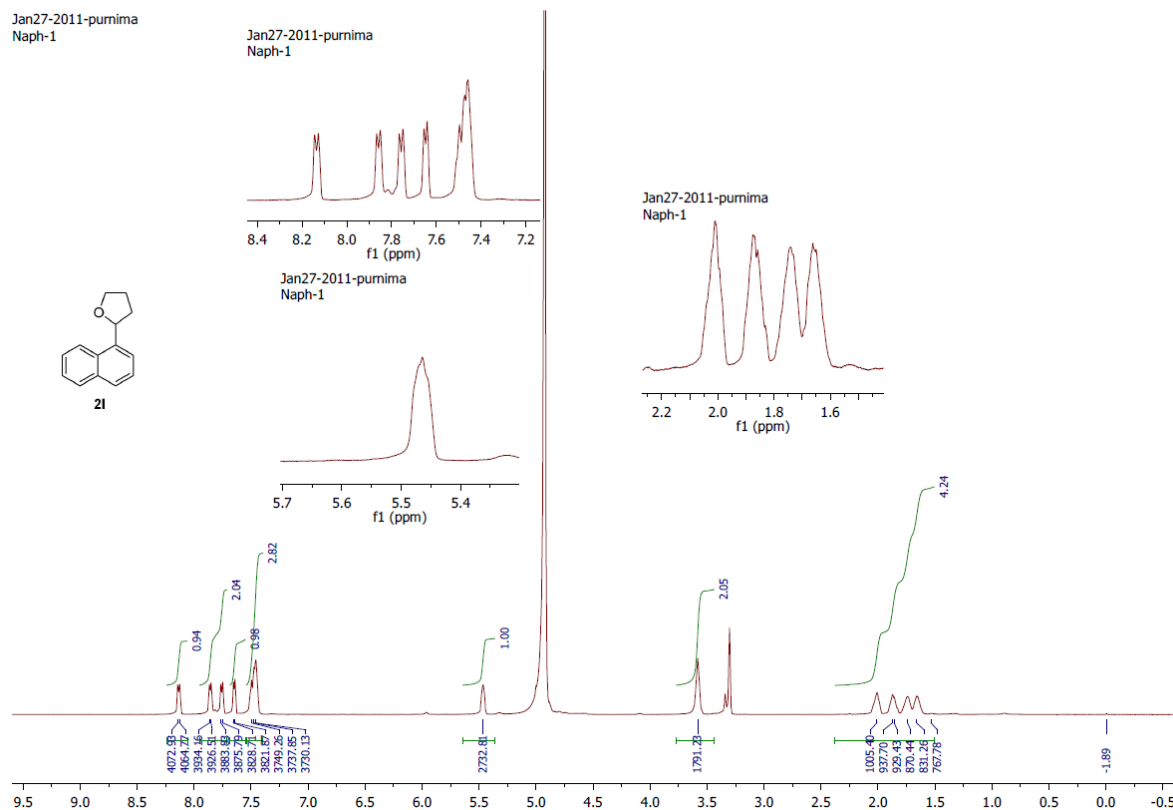

# **<sup>13</sup>C NMR for tetrahydro-2-(naphthalen-4-yl)furan in CD<sub>3</sub>OD (Table 2, entry 1)**

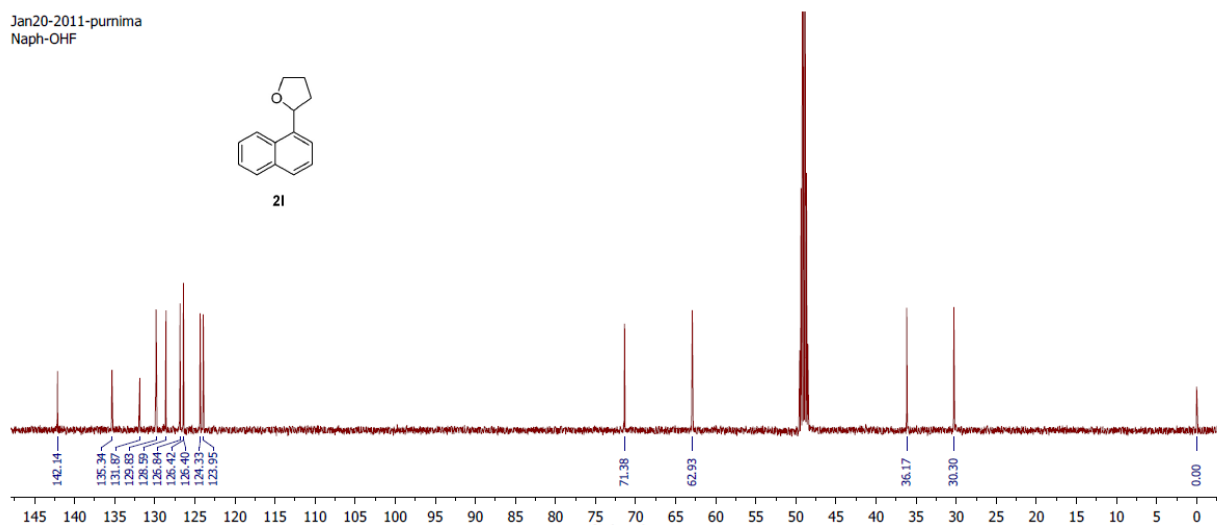

# DEPT at 135 for tetrahydro-2-(naphthalen-4-yl)furan in CD<sub>3</sub>OD (Table 2, entry I)

Jan20-2011-purnima  
Naph-CHF

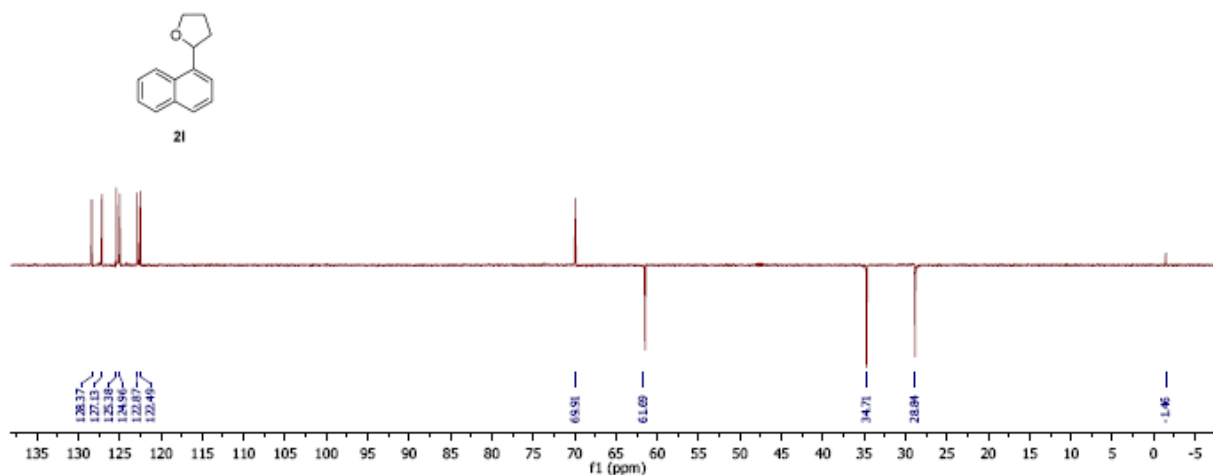

# GCMS for tetrahydro-2-(naphthalen-4-yl)-furan (Table 2, entry I)

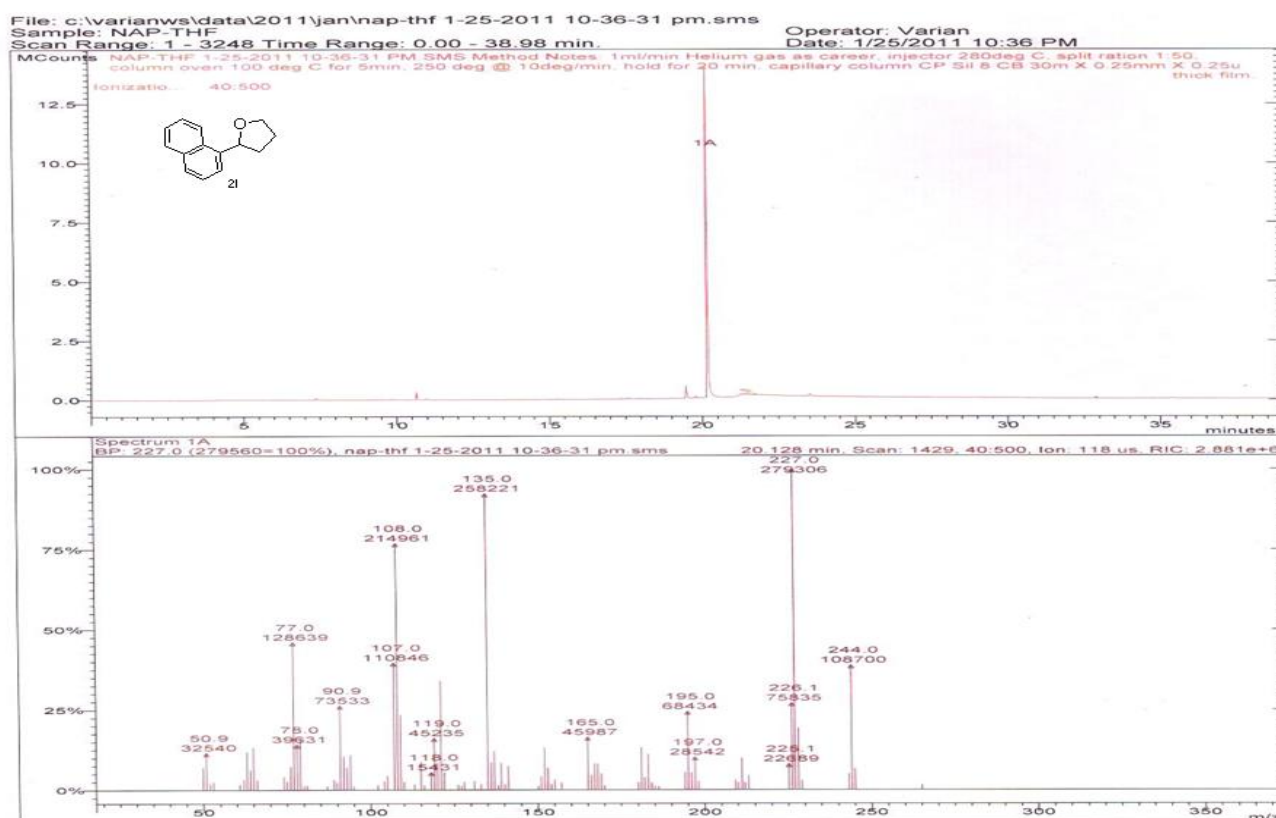

<sup>1</sup>H NMR for 2-(thiophen-2-yl)-tetrahydrofuran in CDCl<sub>3</sub> (Table 2, entry m)

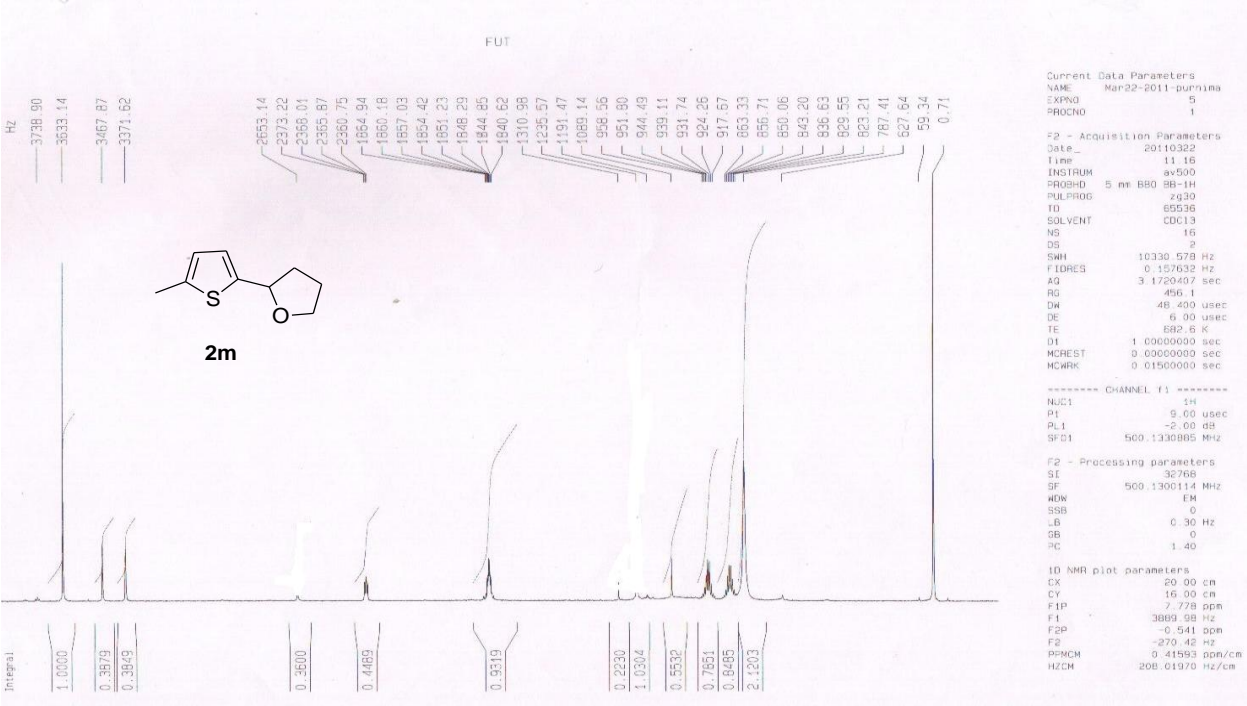

<sup>13</sup>C NMR for 2-(thiophen-2-yl)-tetrahydrofuran in CDCl<sub>3</sub> (Table 2, entry m)

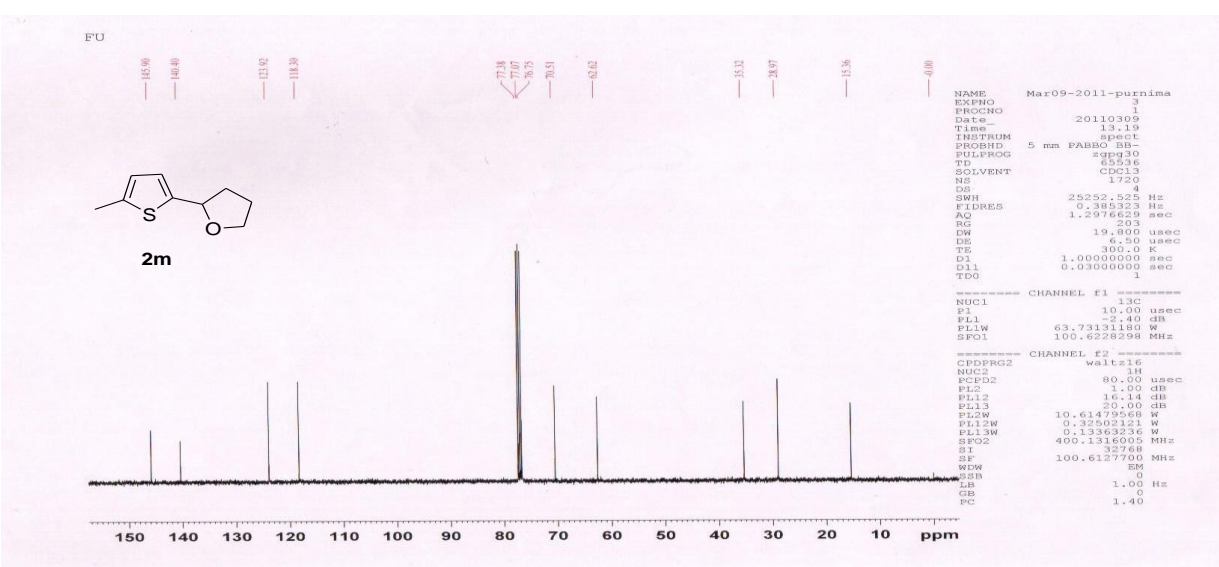



### DEPT at 135 for 2-(thiophen-2-yl)-tetrahydrofuran in CDCl<sub>3</sub> (Table 2, entry m)

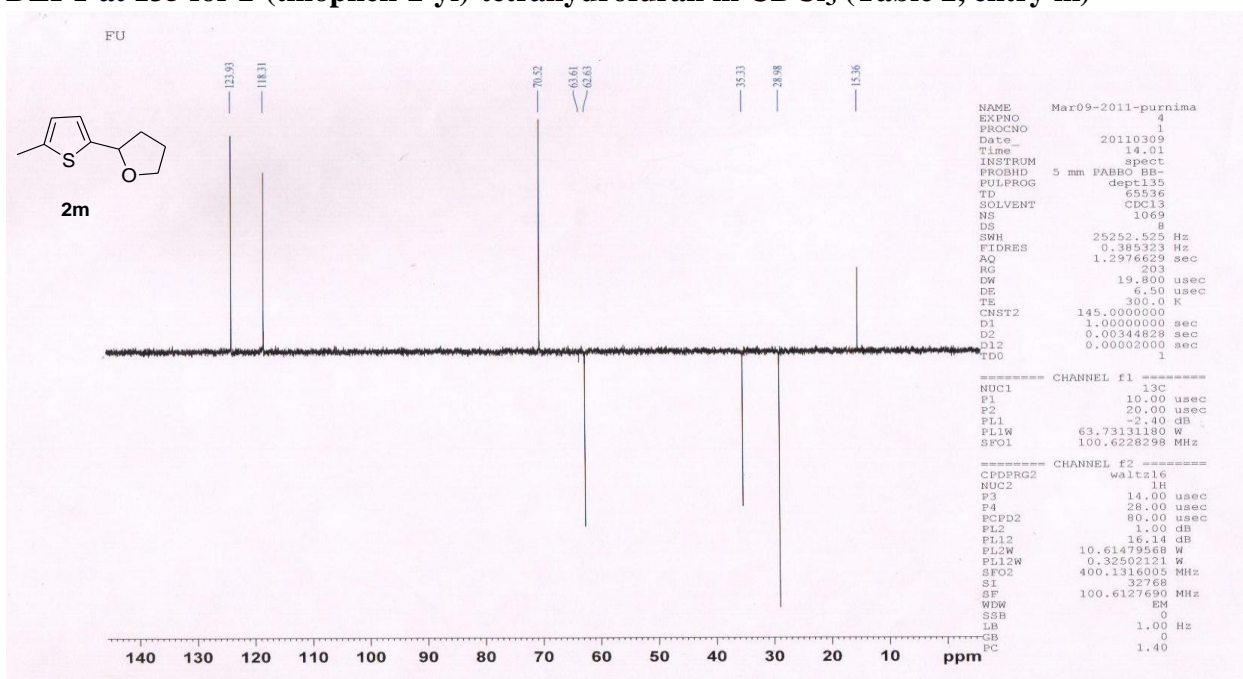

### GC-MS for 2-(thiophen-2-yl)-tetrahydrofuran (Table 2, entry m)

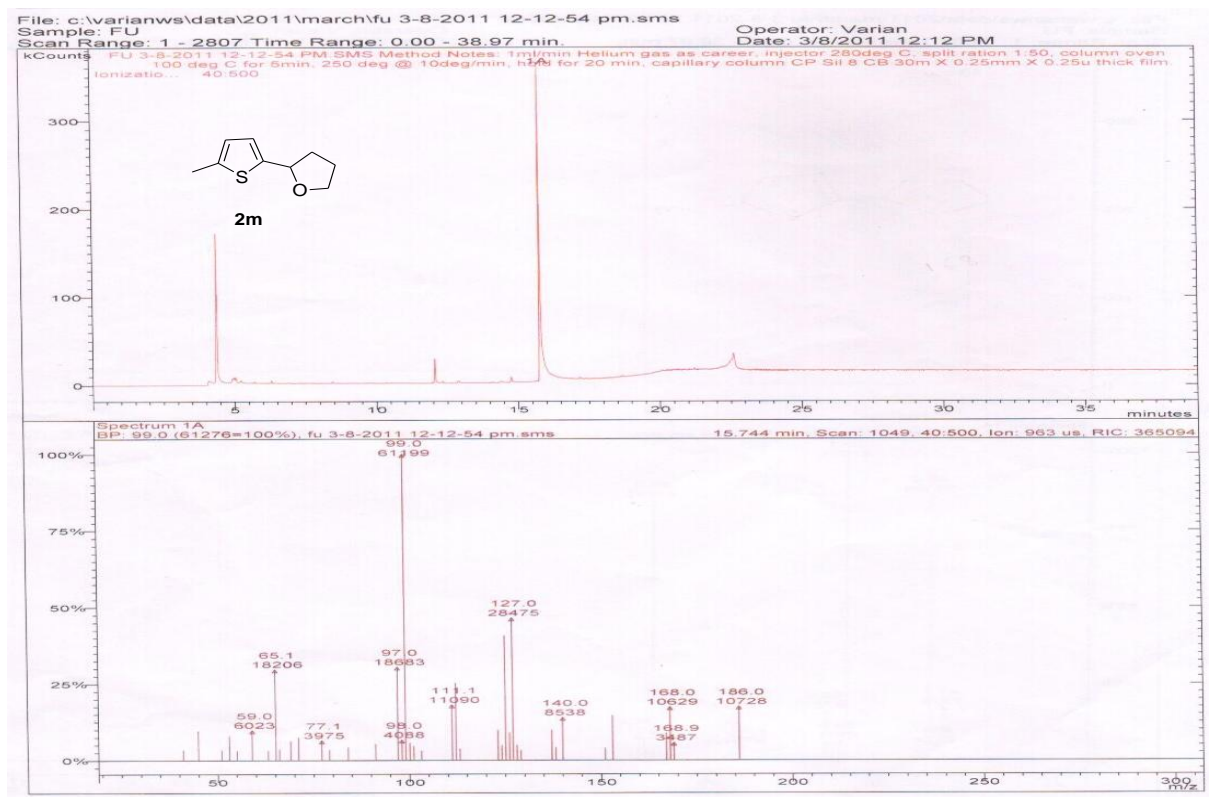

**<sup>1</sup>H NMR for 2-octyl-tetrahydrofuran in CDCl<sub>3</sub> (Table 2, entry r)**

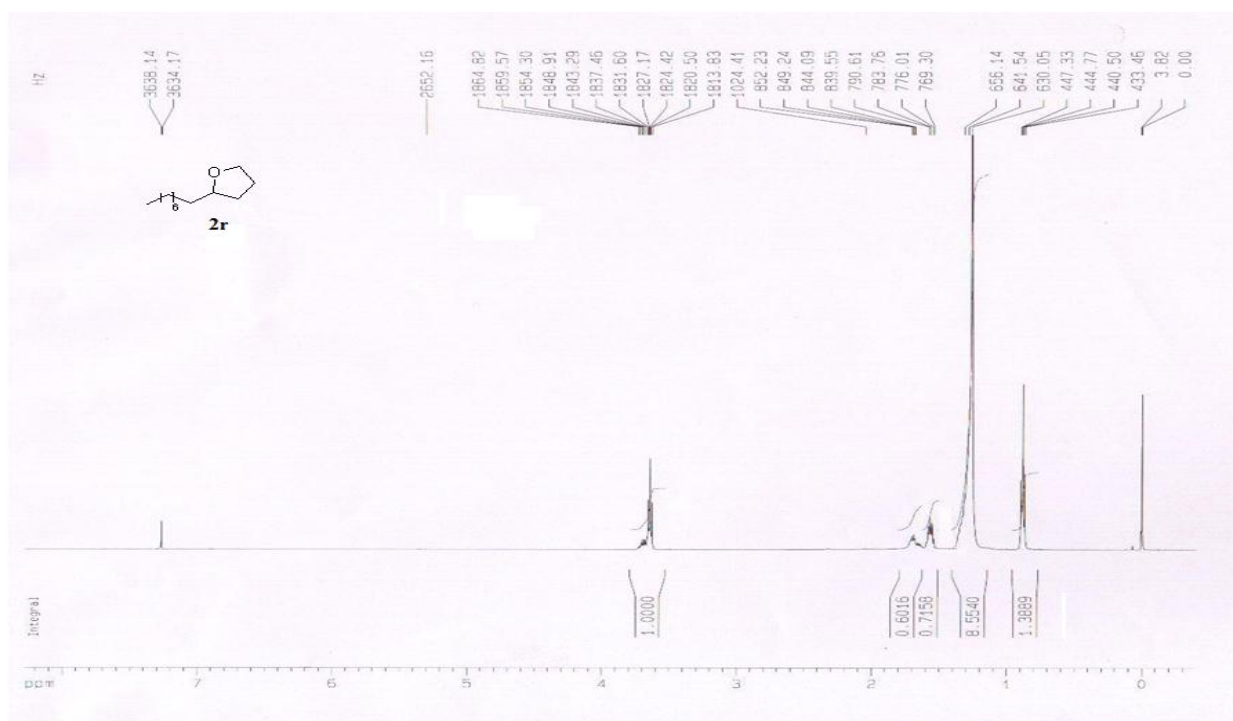

**<sup>13</sup>C NMR for 2-octyl-tetrahydrofuran in CDCl<sub>3</sub> (Table 2, entry r)**

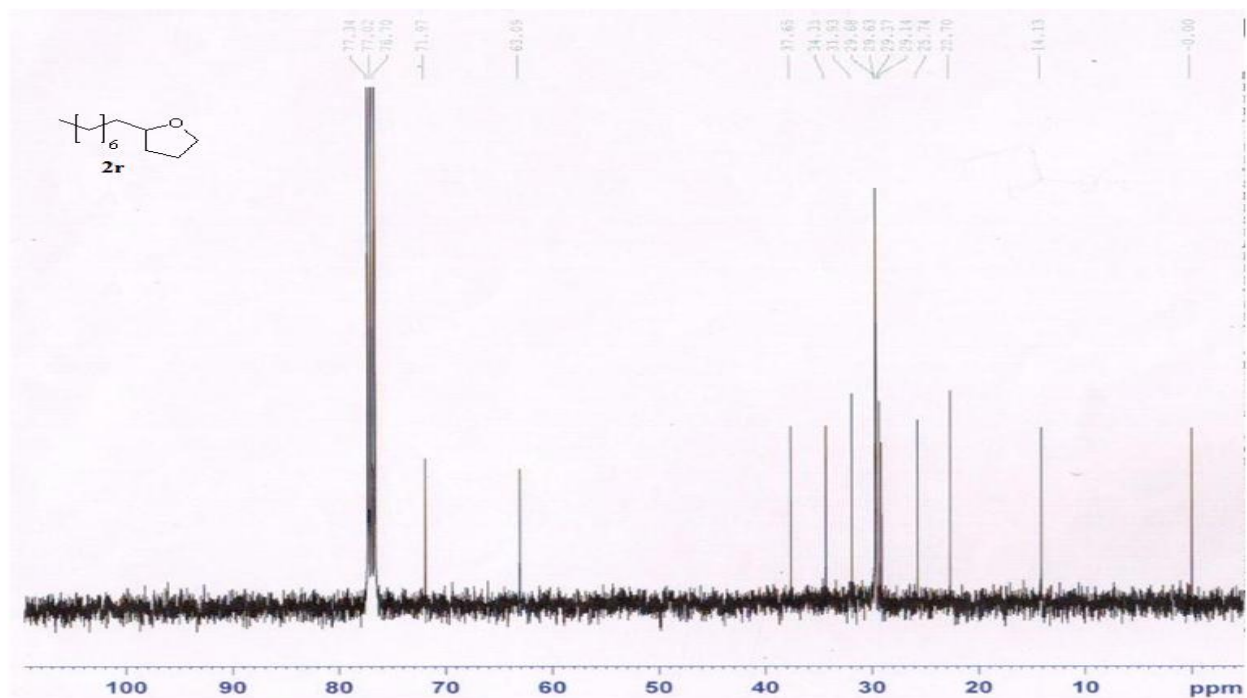

DEPT at 135 for 2-octyl-tetrahydrofuran in CDCl<sub>3</sub> (Table 2, entry r)

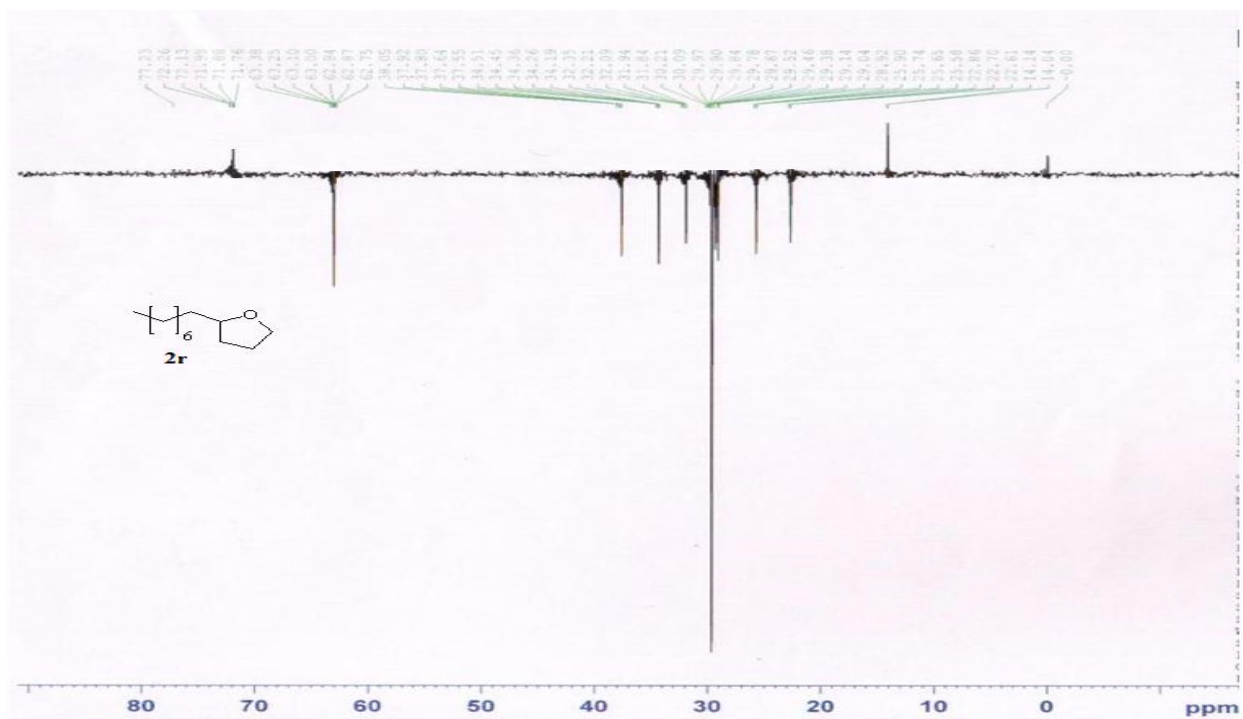

GCMS for 2-octyl-tetrahydrofuran (Table 2, entry r)

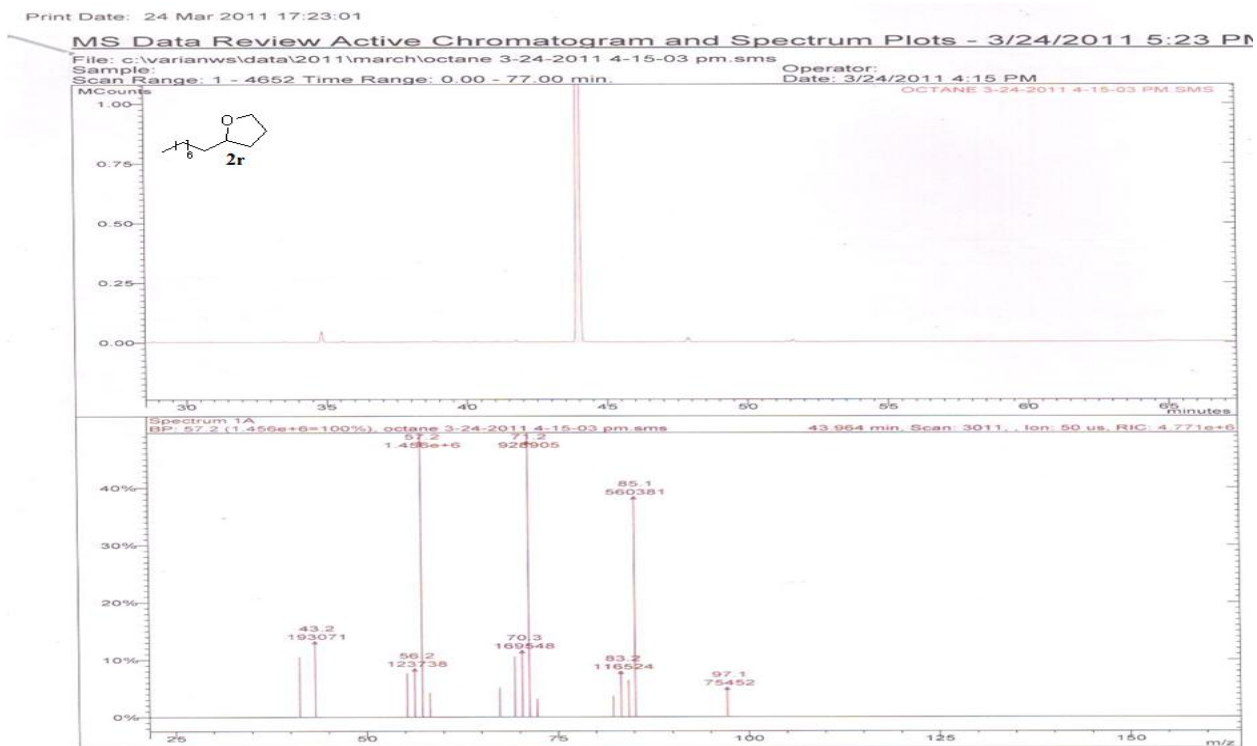

**<sup>1</sup>H NMR for 2-dodecyl-tetrahydrofuran in CDCl<sub>3</sub> (Table 2, entry s)**

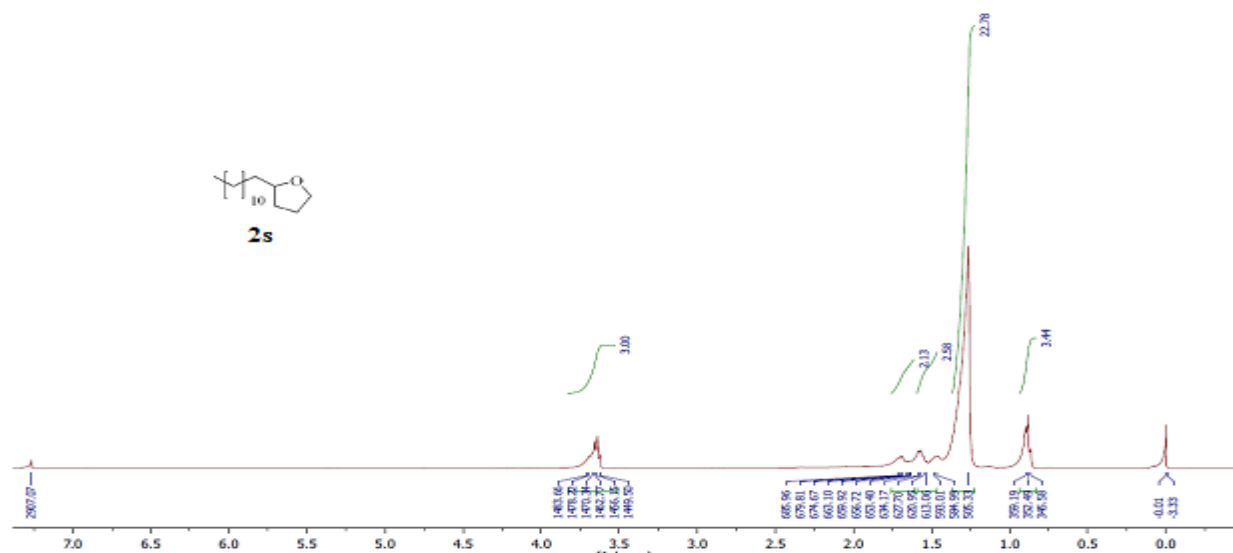

**<sup>13</sup>C NMR for 2-dodecyl-tetrahydrofuran in CDCl<sub>3</sub> (Table 2, entry s)**

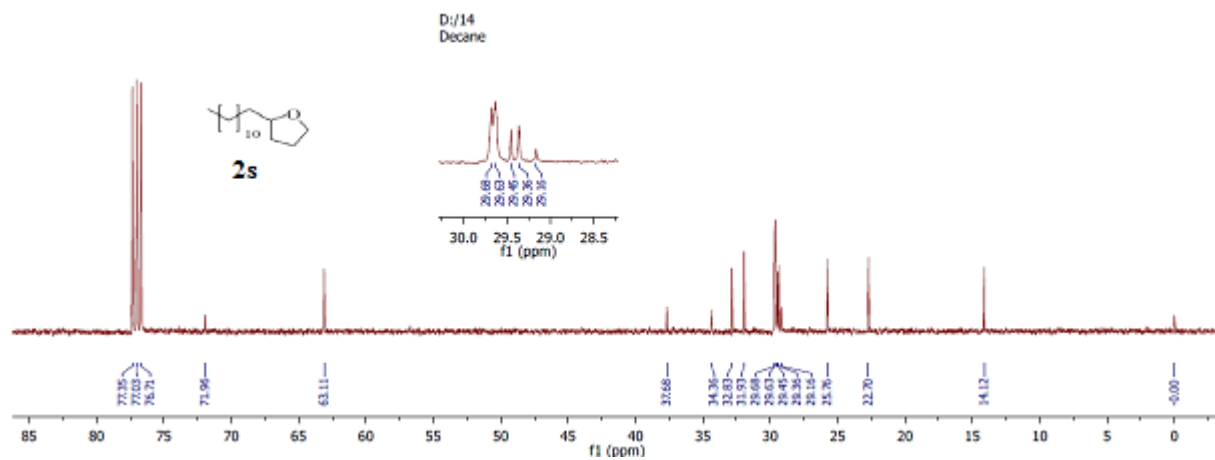

### DEPT at 135 for 2-dodecyl-tetrahydrofuran in CDCl<sub>3</sub> (Table 2, entry s)

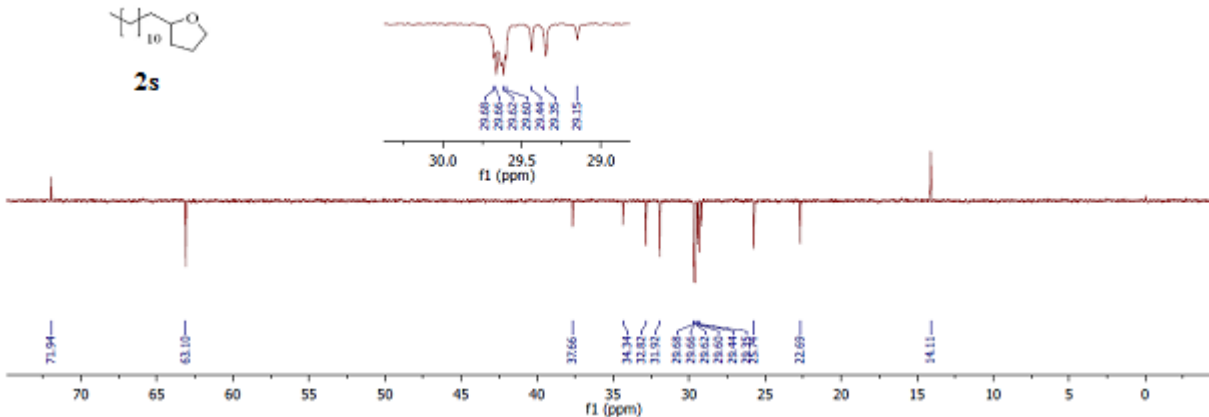

### GCMS for 2-dodecyl-tetrahydrofuran (Table 2, entry s)

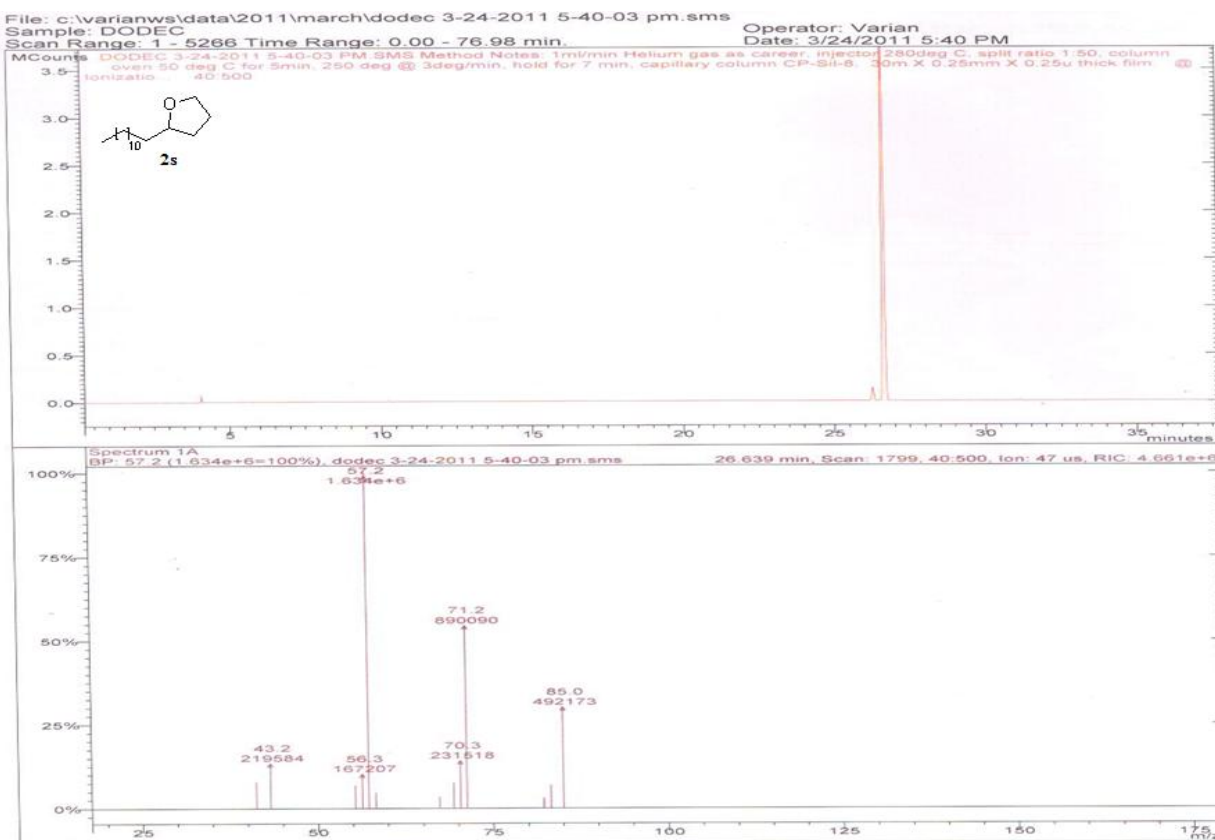

# **<sup>1</sup>H NMR for tetrahydro-2-tetradecylfuran in CDCl<sub>3</sub> (Table 2, entry t)**

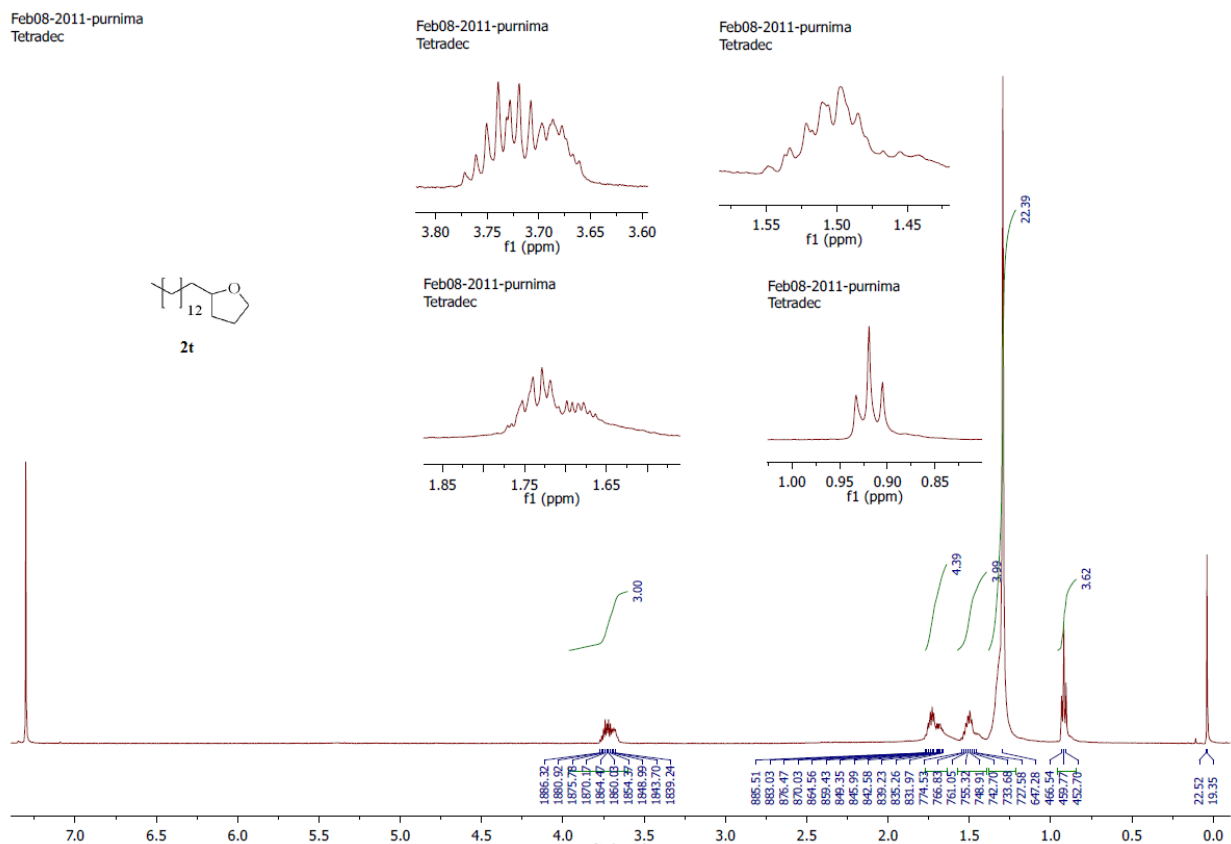

# **<sup>13</sup>C NMR for tetrahydro-2-tetradecylfuran in CDCl<sub>3</sub> (Table 2, entry t)**

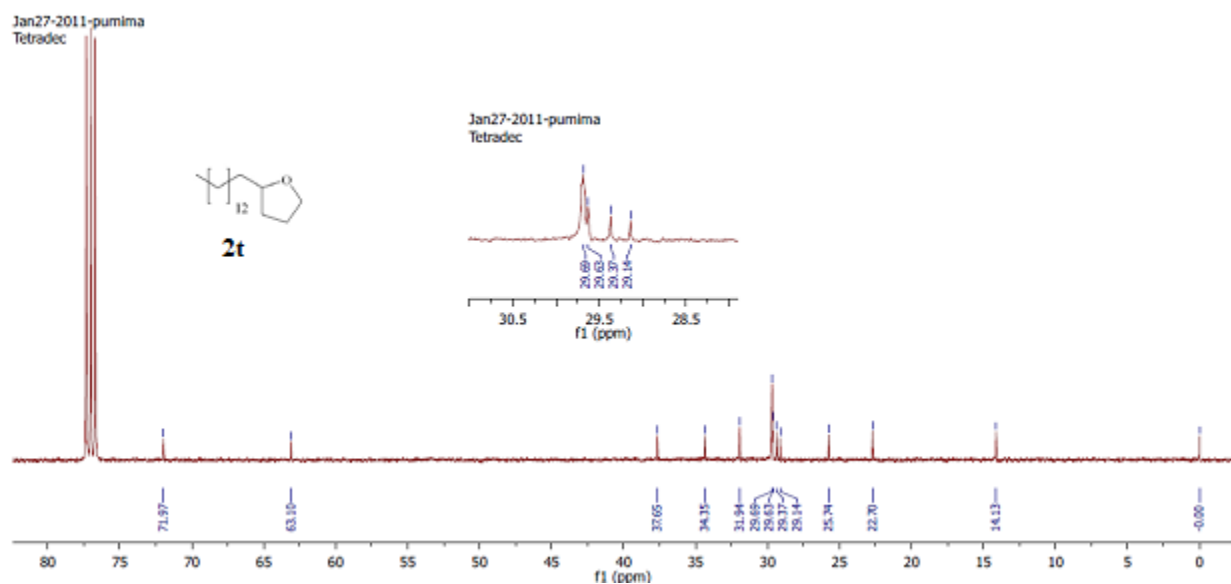



## DEPT at 135 for tetrahydro-2-tetradecylfuran in CDCl<sub>3</sub> (Table 2, entry t)

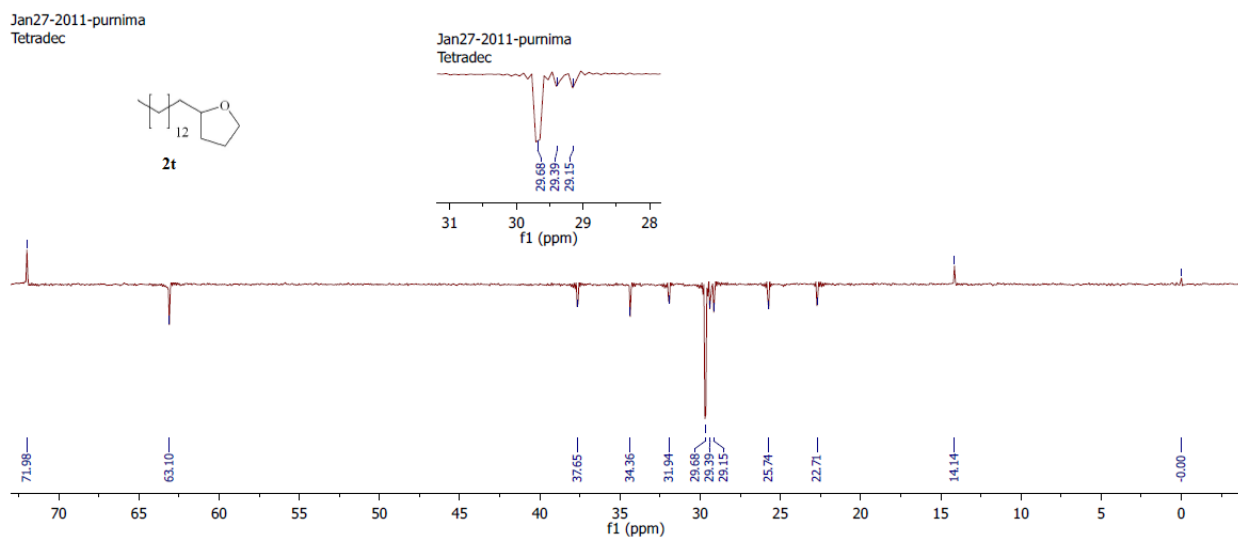

## GCMS for tetrahydro-2-tetradecylfuran (Table 2, entry t)

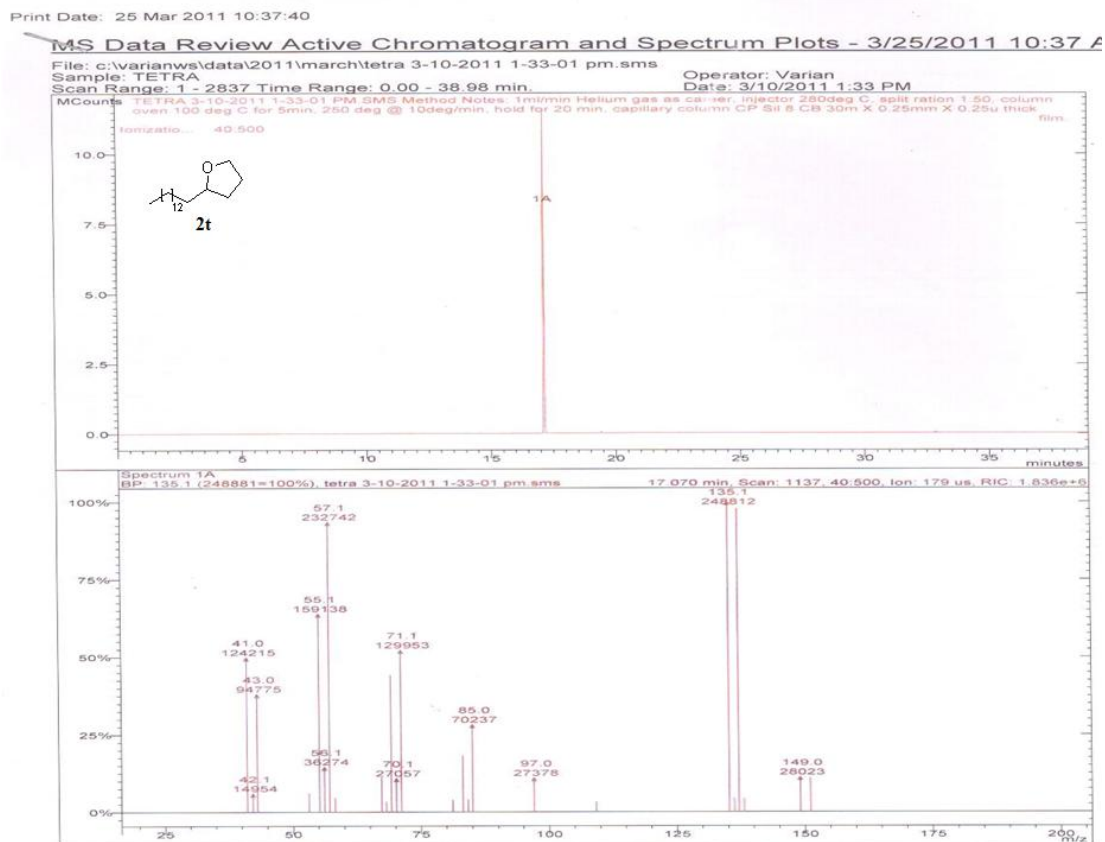

# <sup>1</sup>H NMR for 2-sec-butyl-tetrahydrofuran in CDCl<sub>3</sub> (Table 2, entry u)

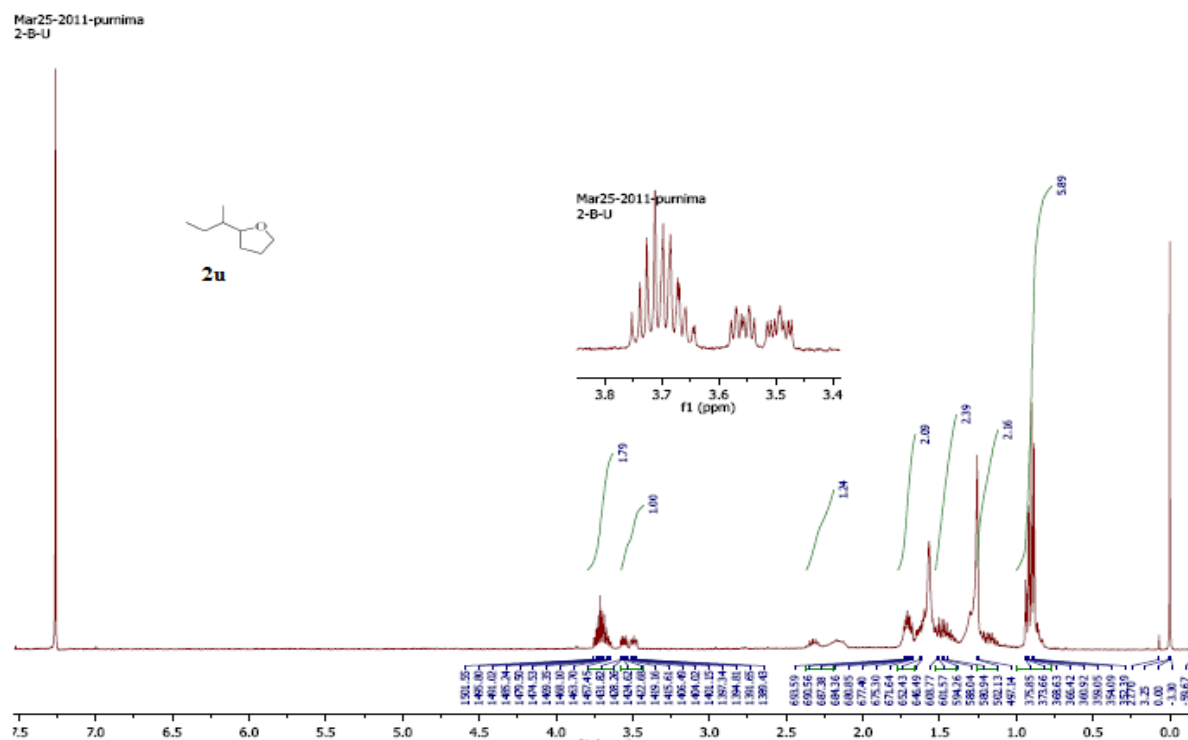

# <sup>13</sup>C NMR for 2-sec-butyl-tetrahydrofuran in CDCl<sub>3</sub> (Table 2, entry u)

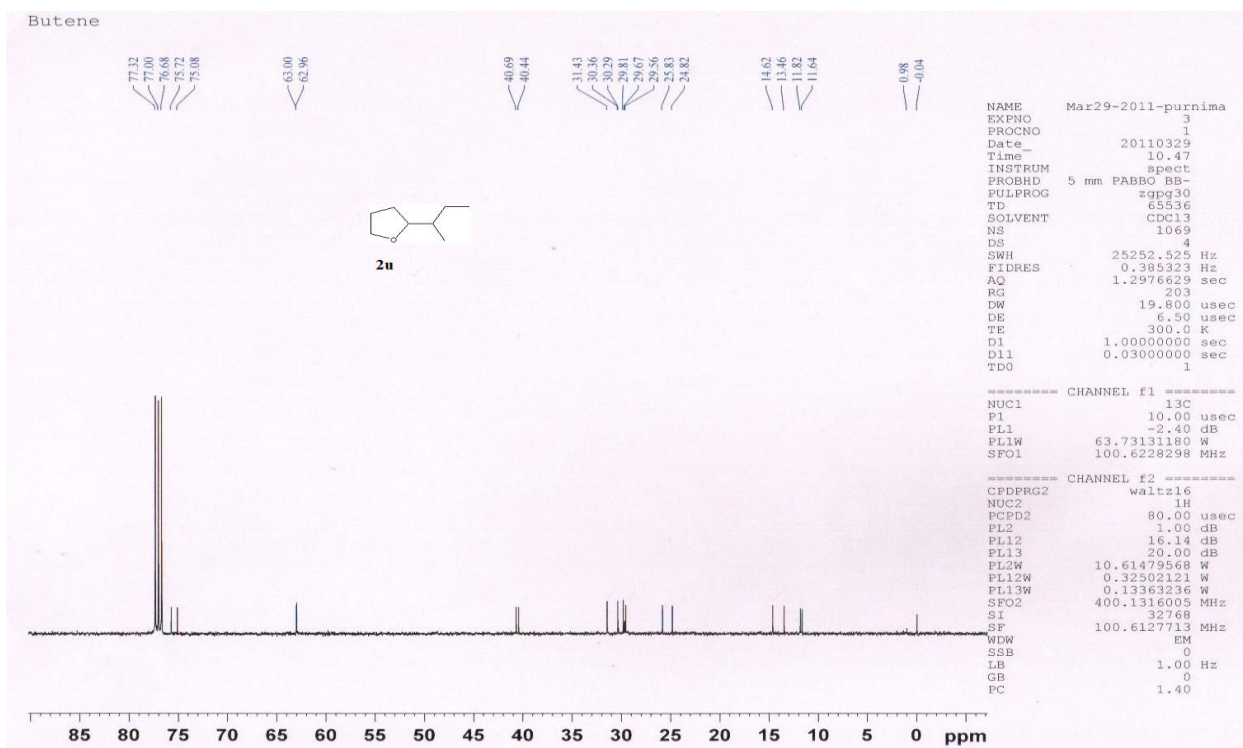



DEPT at 135 for 2-sec-butyl-tetrahydrofuran in CDCl<sub>3</sub> (Table 2, entry u)

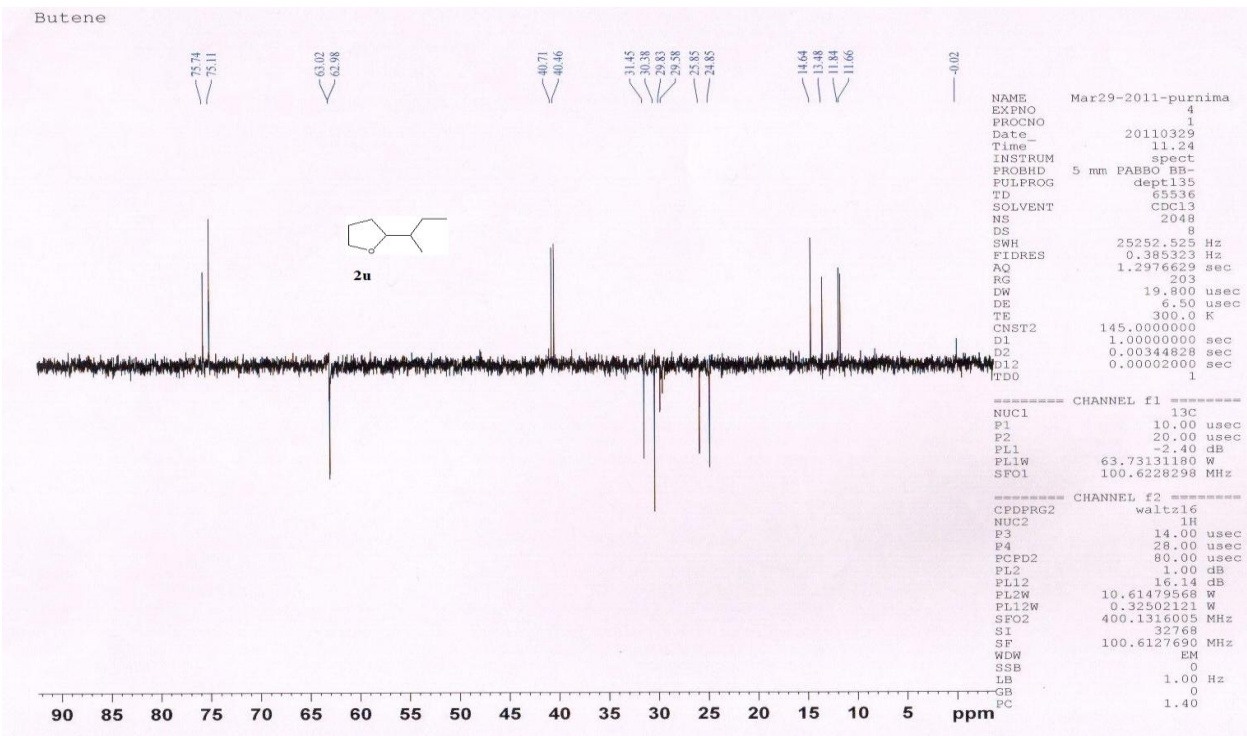

GCMS for 2-sec-butyl-tetrahydrofuran (Table 2, entry u)

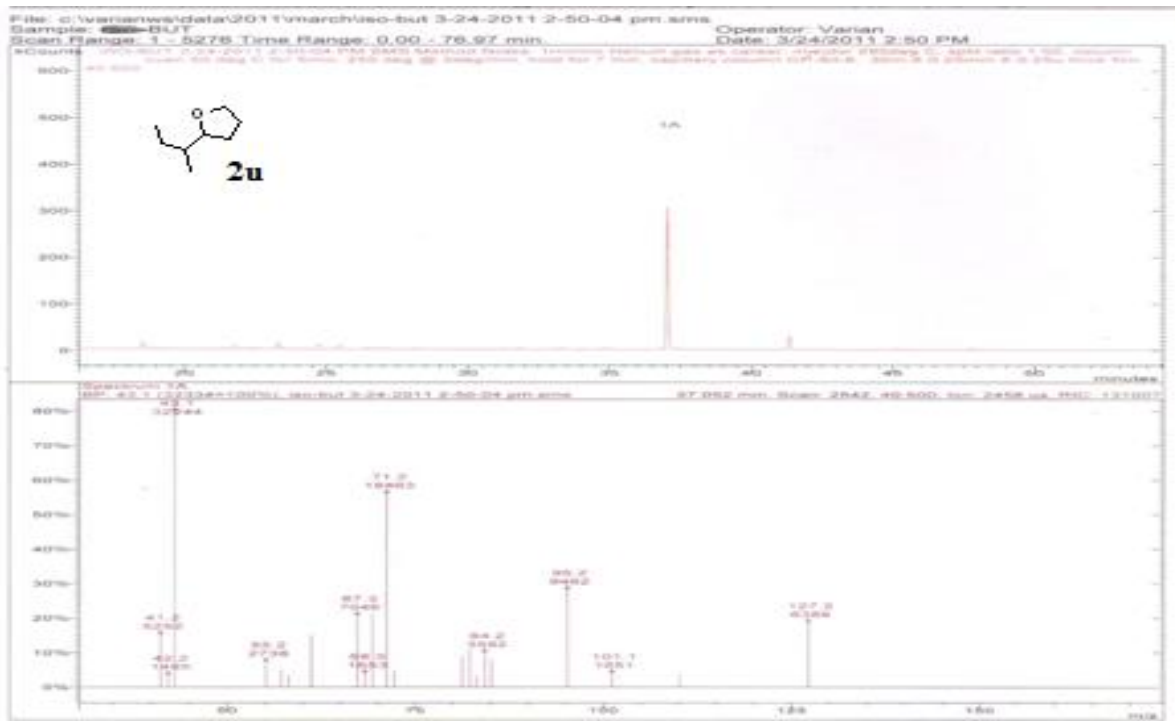

**<sup>1</sup>H NMR for 2-methyl-5-phenyl-tetrahydrofuran and 2-methyl-2-phenyl-tetrahydrofuran in CDCl<sub>3</sub> (Table 3, entry a and e)**

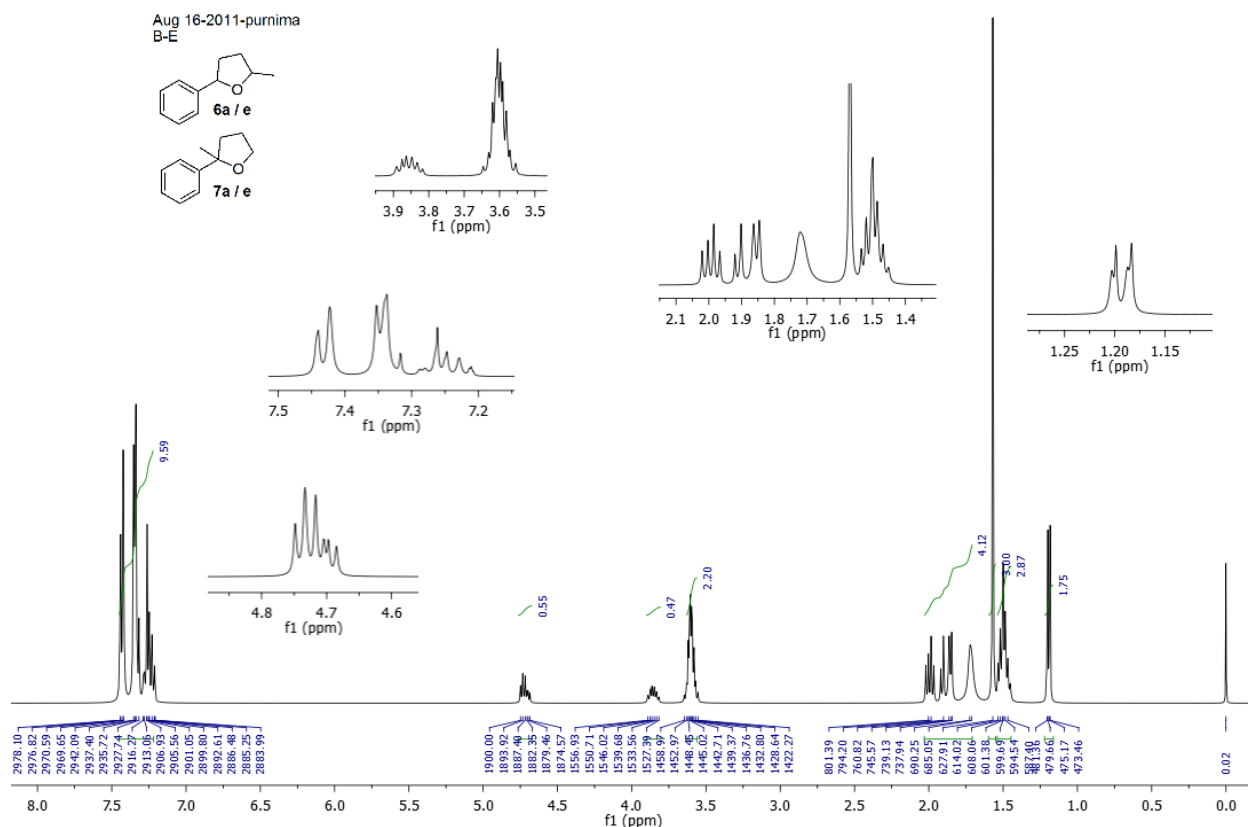

**<sup>13</sup>C NMR for 2-methyl-5-phenyl-tetrahydrofuran and 2-methyl-2-phenyl-tetrahydrofuran in CDCl<sub>3</sub> (Table 3, entry a and e)**

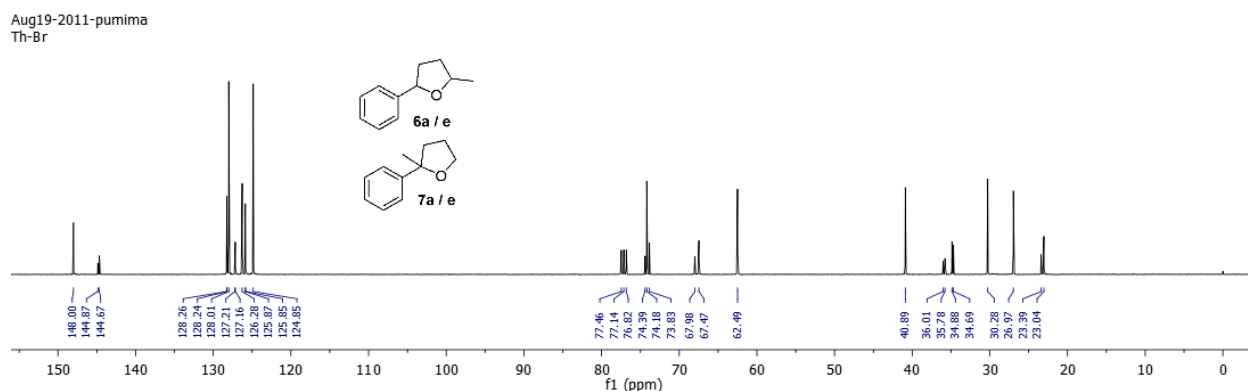

# DEPT at 135 for 2-methyl-5-phenyl-tetrahydrofuran and 2-methyl-2-phenyl-tetrahydrofuran in CDCl<sub>3</sub> (Table 3, entry a and e)

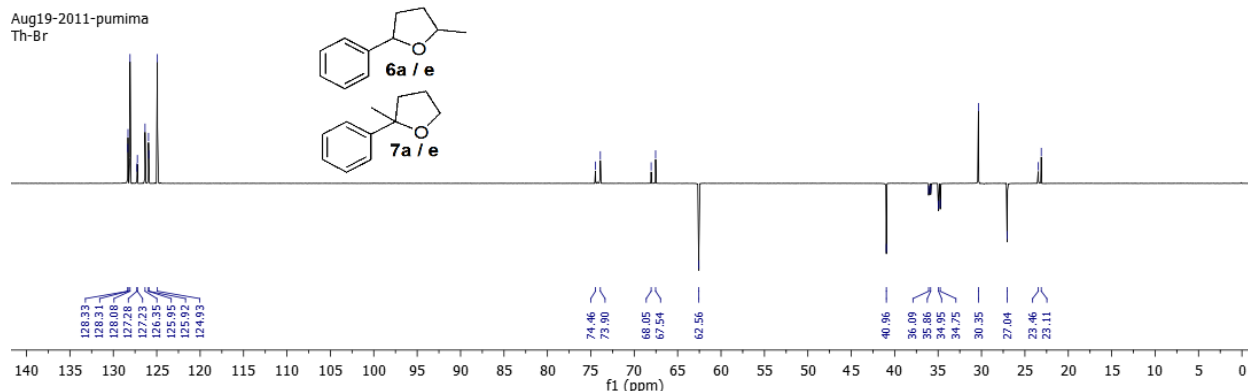

## GCMS for 2-methyl-5-phenyl-tetrahydrofuran (Table 3, entry a and e)

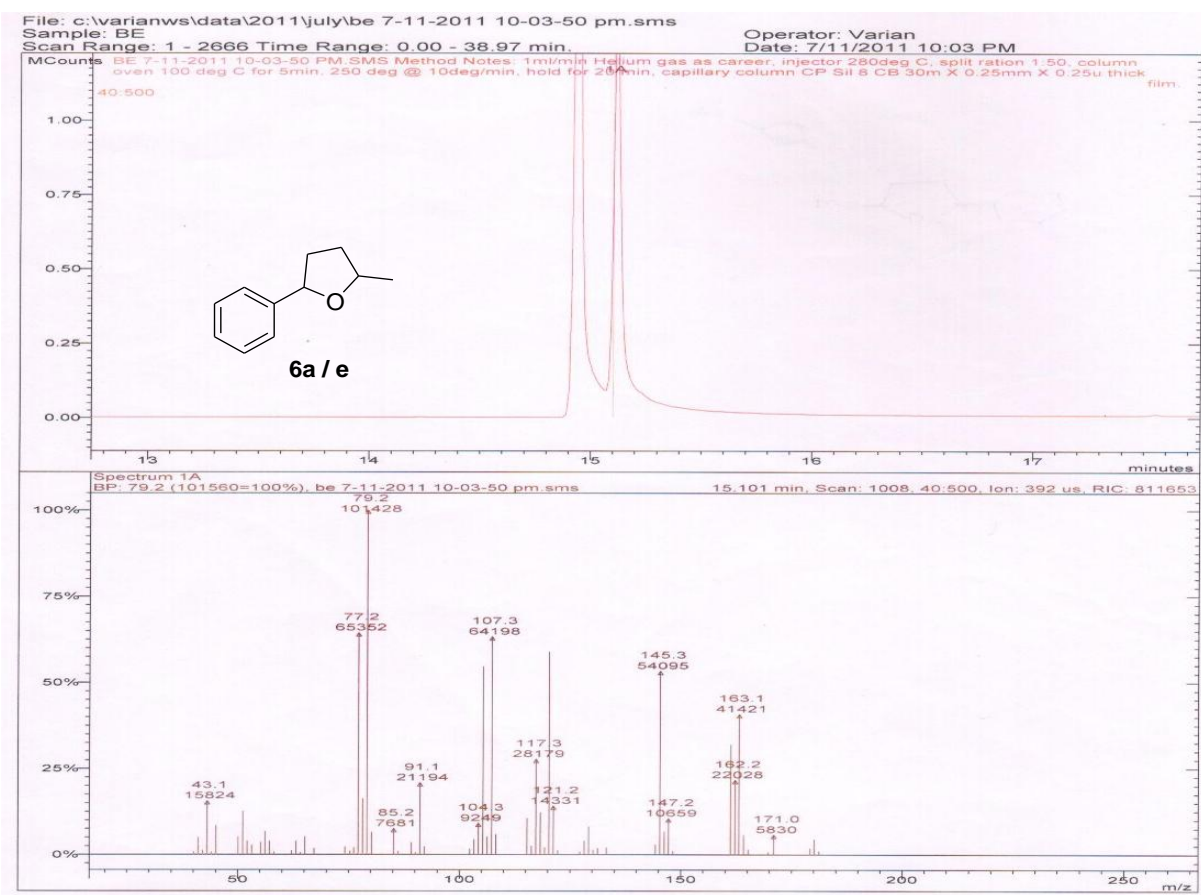

# GCMS for 2-methyl-2-phenyl-tetrahydrofuran (Table 3, entry a and e)

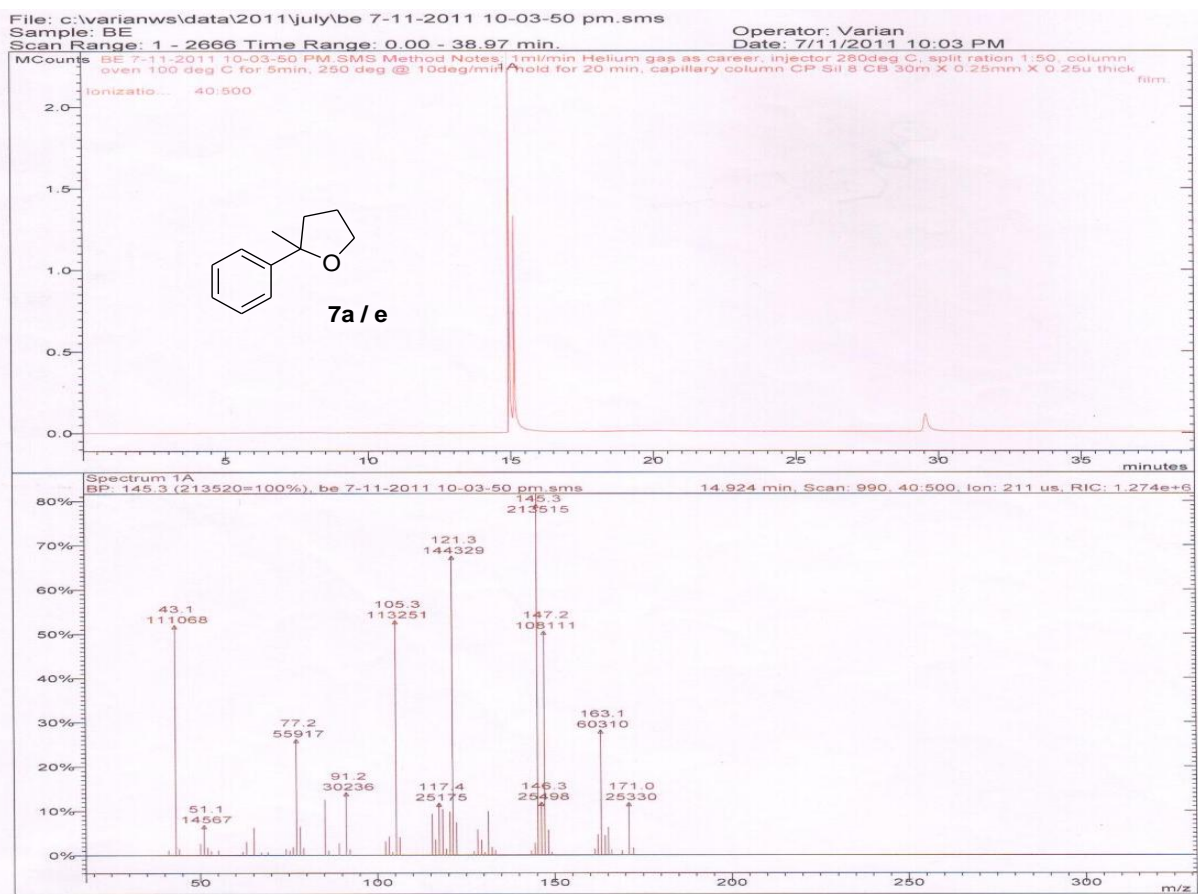

# **<sup>1</sup>H NMR for 2-(4-methoxyphenyl)-5-methyl-tetrahydrofuran and 2-(4-methoxyphenyl)-2-methyl-tetrahydrofuran in CDCl<sub>3</sub> (Table 3, entry b and f)**

Aug16-2011-pumima  
OME

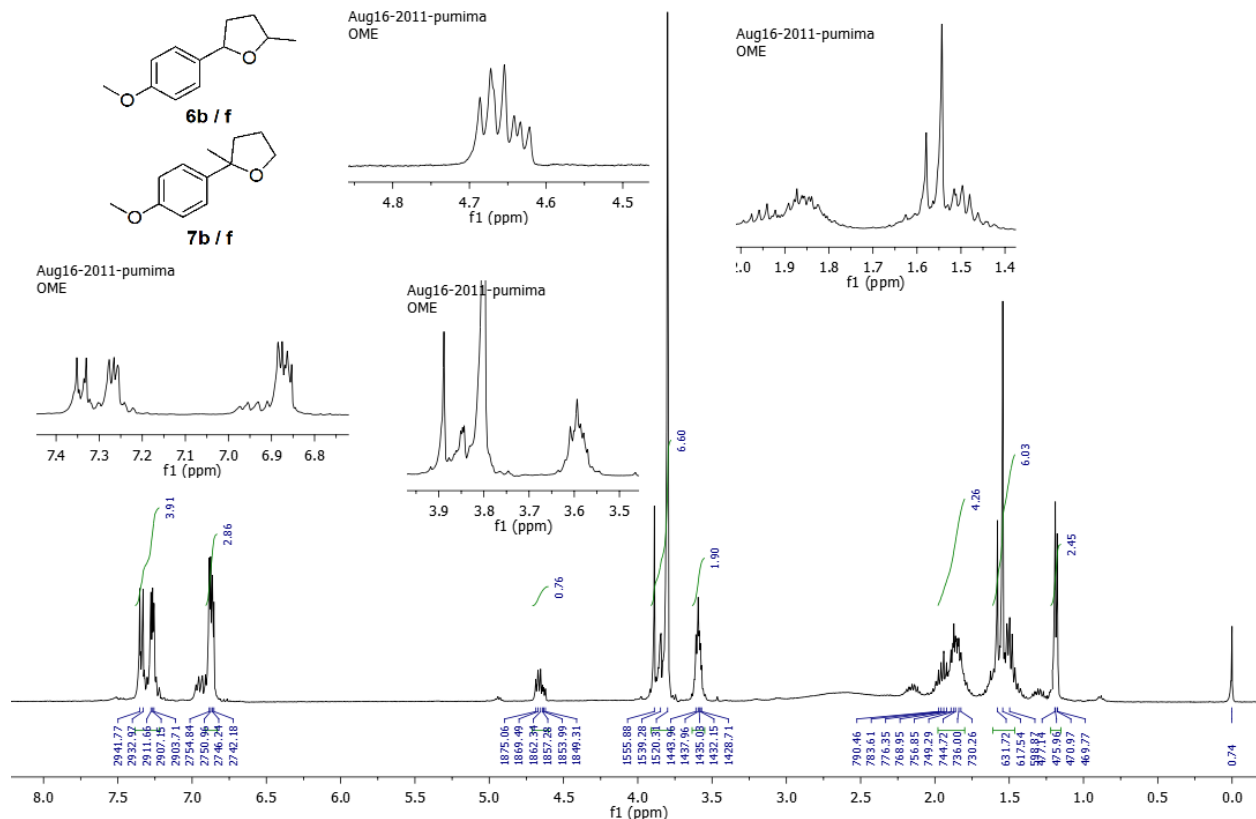

# **<sup>13</sup>C NMR for 2-(4-methoxyphenyl)-5-methyl-tetrahydrofuran and 2-(4-methoxyphenyl)-2-methyl-tetrahydrofuran in CDCl<sub>3</sub> (Table 3, entry b and f)**

Aug17-2011-pumima  
OME

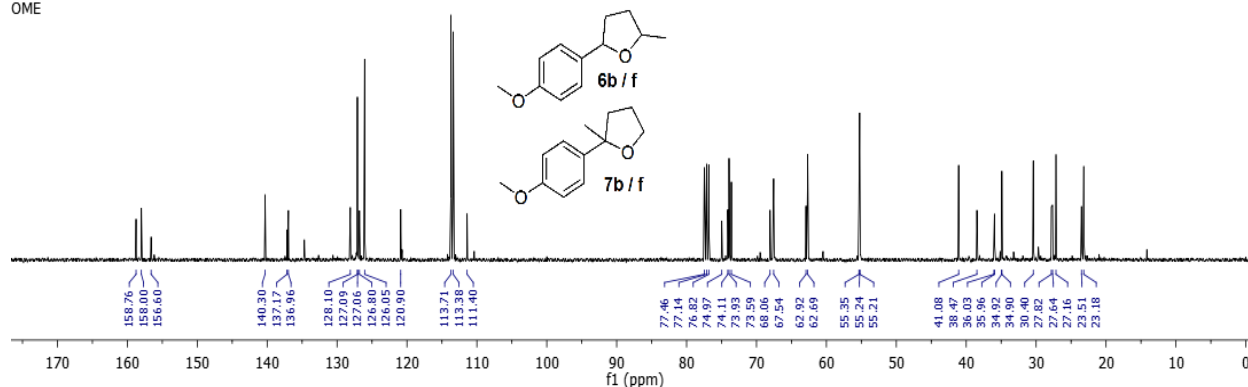

# **DEPT at 135 for 2-(4-methoxyphenyl)-5-methyl-tetrahydrofuran and 2-(4-methoxyphenyl)-2-methyl-tetrahydrofuran in CDCl<sub>3</sub> (Table 3, entry b and f)**

Aug17-2011-pumima  
OME

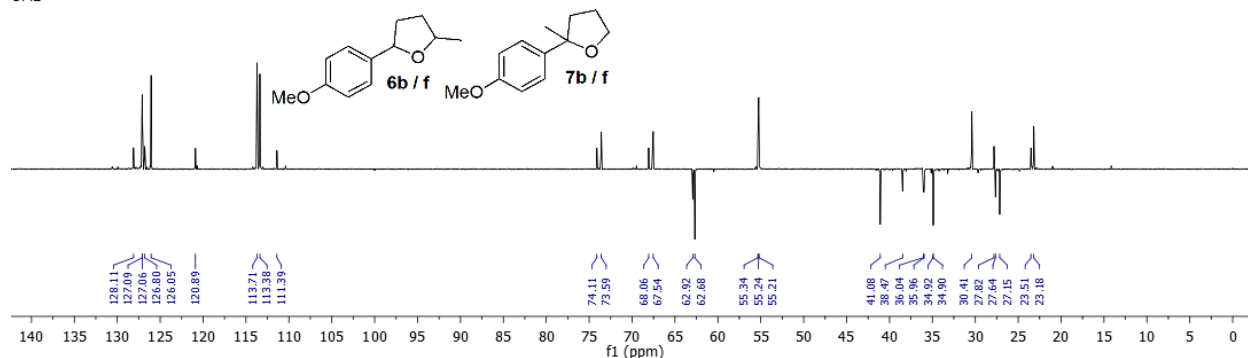

## **GCMS for 2-(4-methoxyphenyl)-5-methyl-tetrahydrofuran (Table 3, entry b and f)**

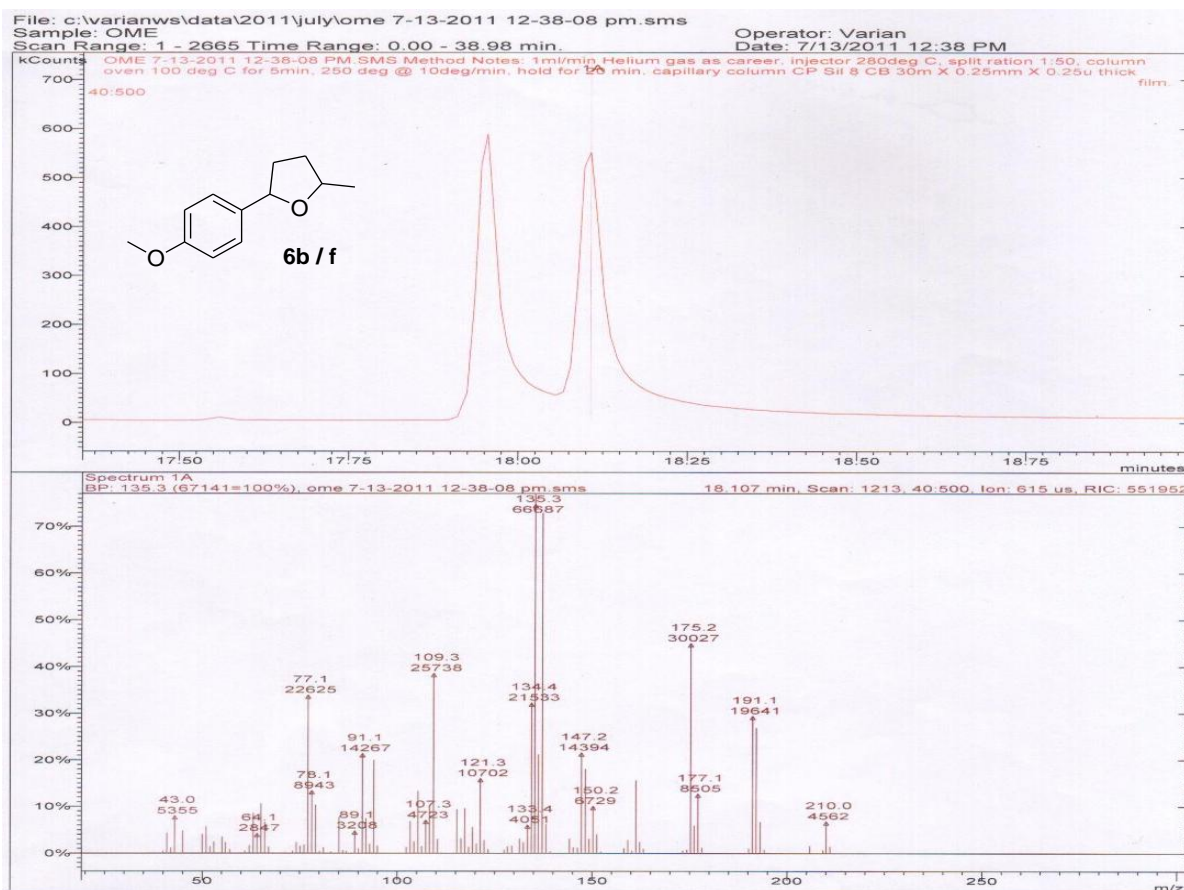



# GCMS for 2-(4-methoxyphenyl)-2-methyl-tetrahydrofuran (Table 3, entry b and f)

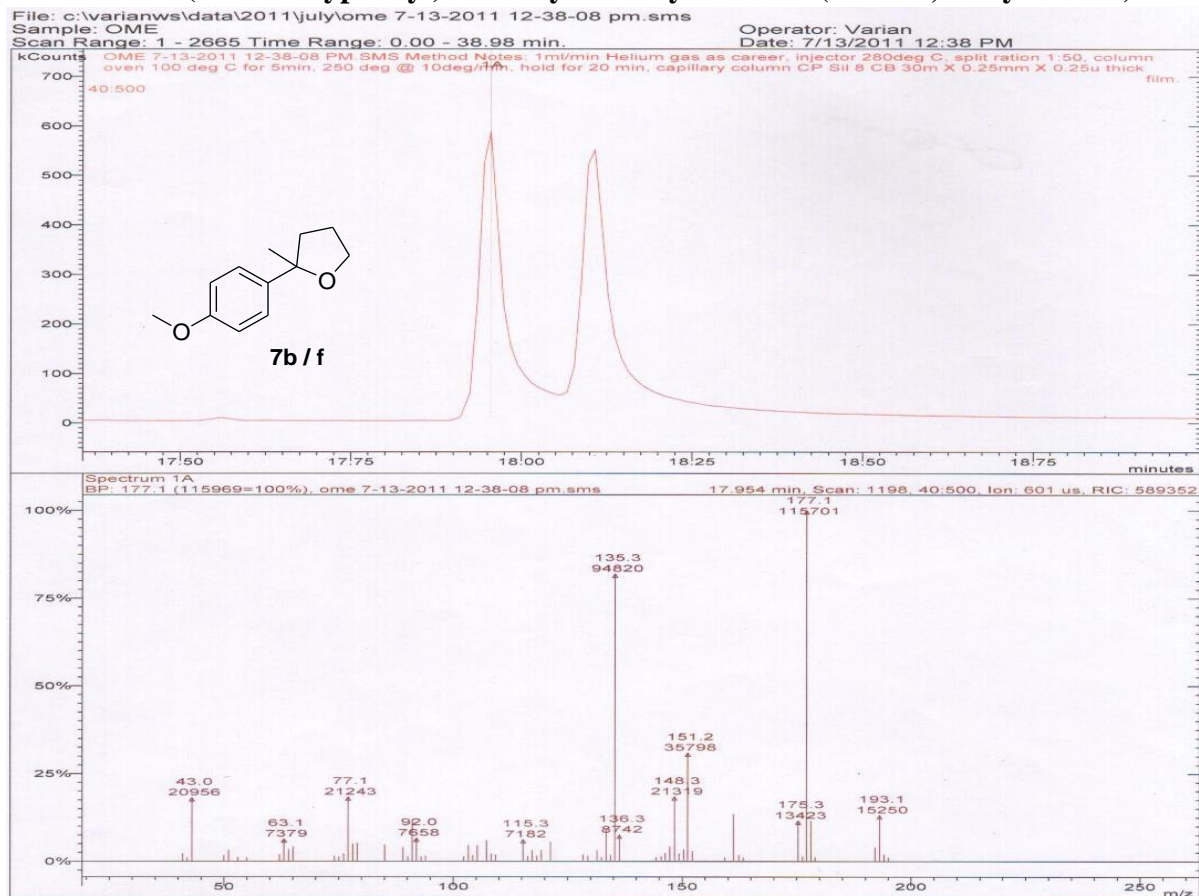

# **<sup>1</sup>H NMR for 2-methyl-5-(naphthalen-1-yl)-tetrahydrofuran and 2-methyl-2-(naphthalen-1-yl)-tetrahydrofuran in CDCl<sub>3</sub> (Table 3, entry c and g)**

Aug16-2011-pumima

Aug16-2011-pumima

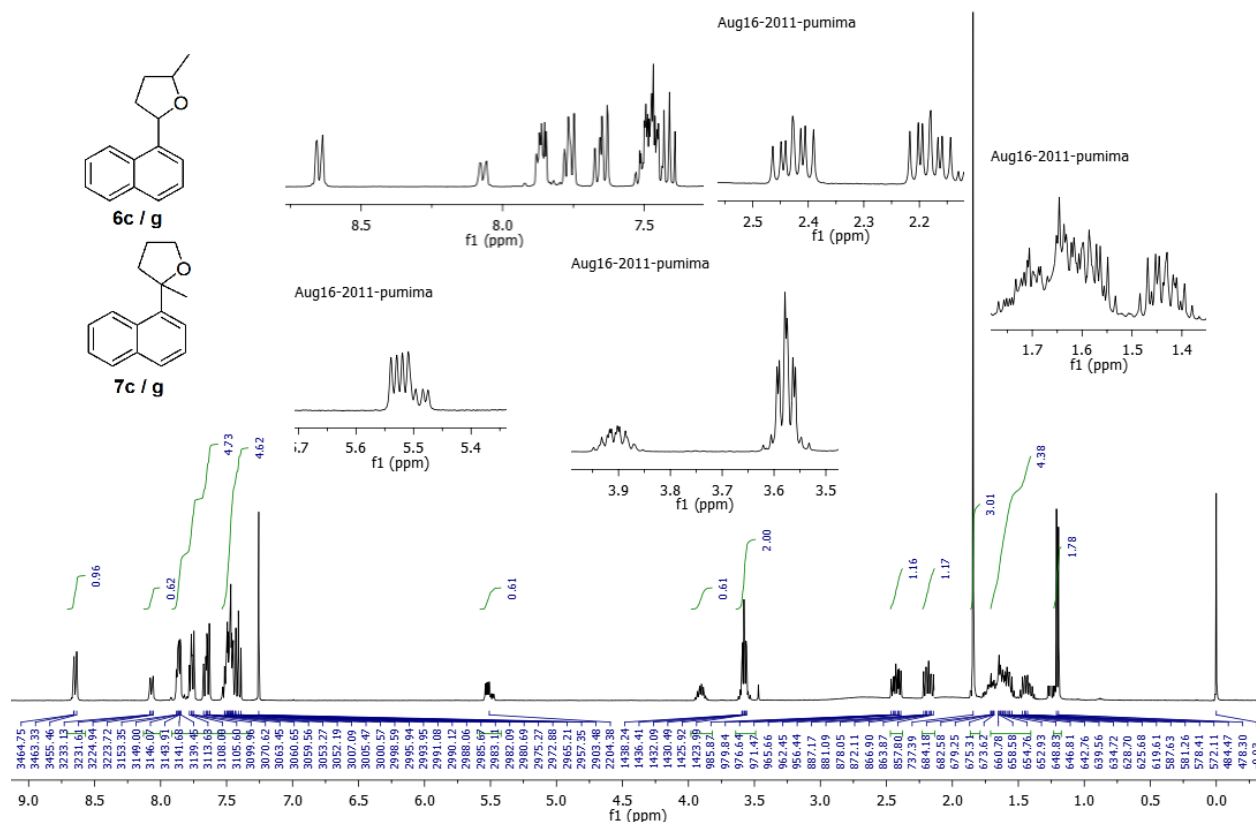

# **<sup>13</sup>C NMR for 2-methyl-5-(naphthalen-1-yl)-tetrahydrofuran and 2-methyl-2-(naphthalen-1-yl)-tetrahydrofuran in CDCl<sub>3</sub> (Table 3, entry c and g)**

Aug17-2011-pumima

Nap

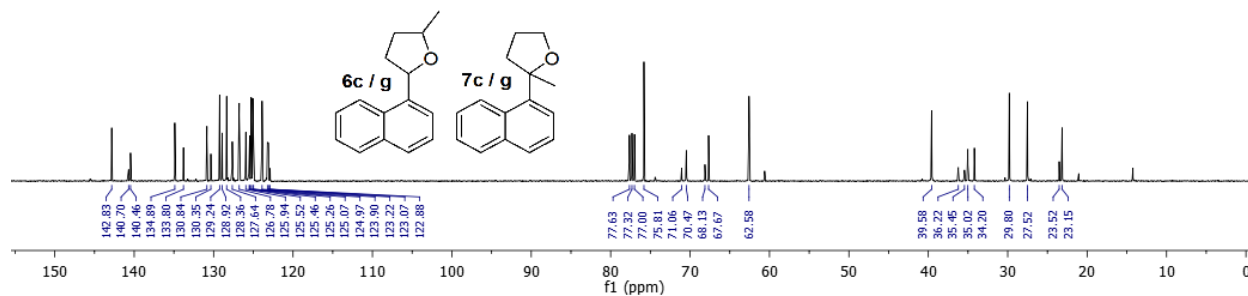



# **DEPT at 135 for 2-methyl-5-(naphthalen-1-yl)-tetrahydrofuran and 2-methyl-2-(naphthalen-1-yl)-tetrahydrofuran in CDCl<sub>3</sub> (Table 3, entry c and g)**

Aug17-2011-pumima  
Nap

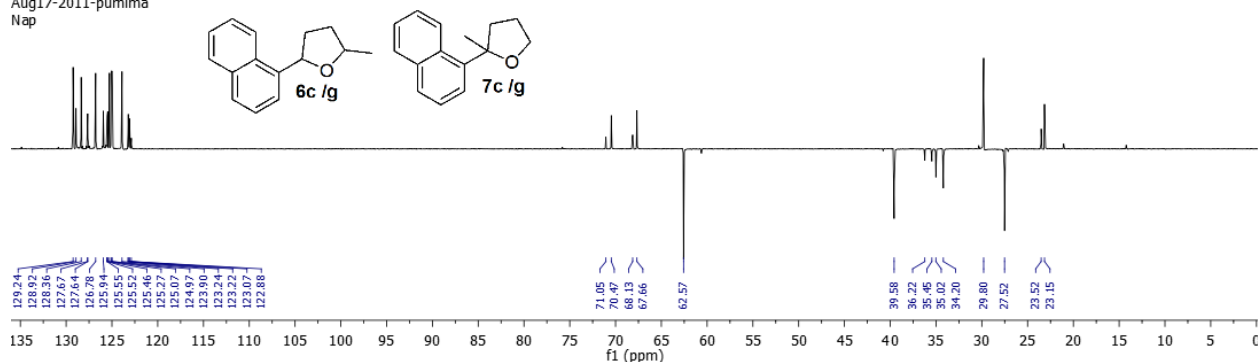

## **GCMS for 2-methyl-5-(naphthalen-1-yl)-tetrahydrofuran (Table 3, entry c and g)**

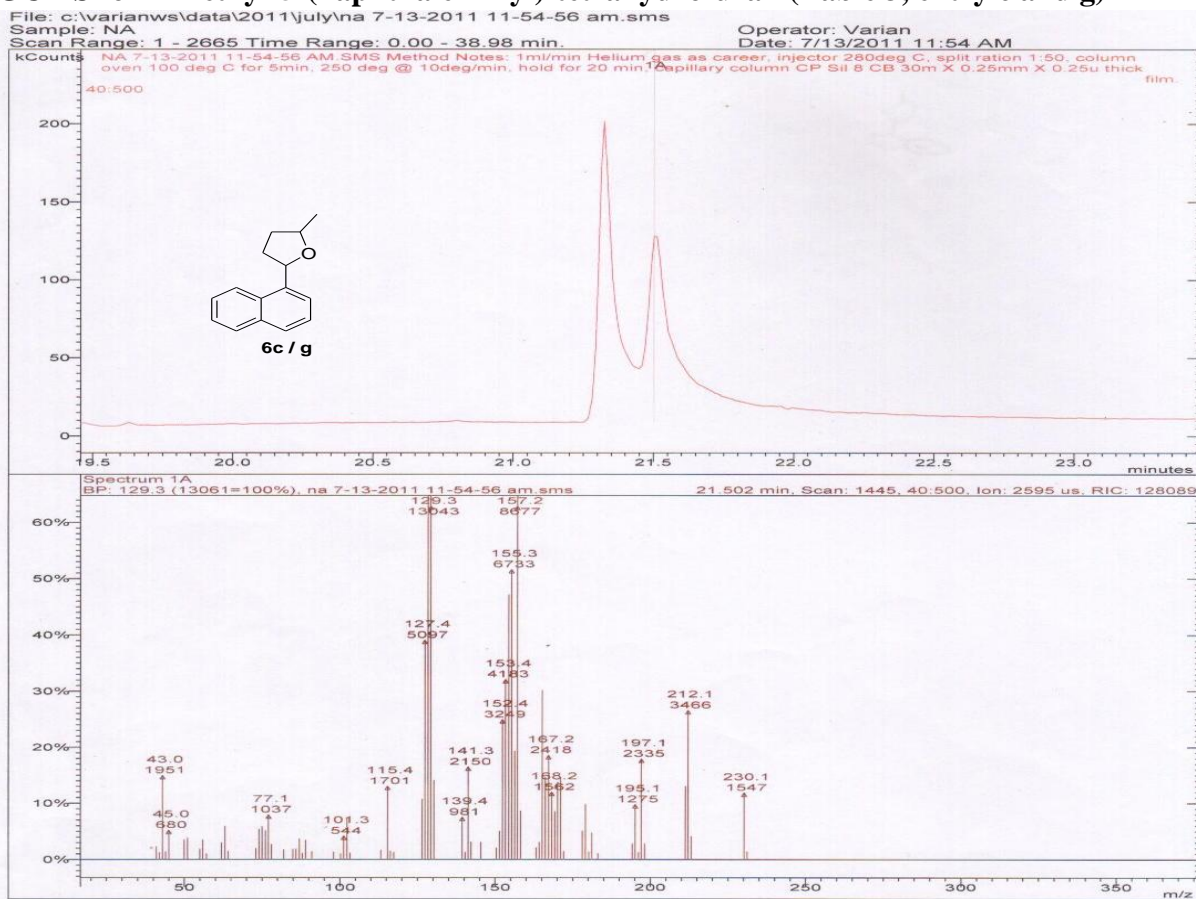

# GCMS for 2-methyl-2-(naphthalen-1-yl)-tetrahydrofuran (Table 3, entry c and g)

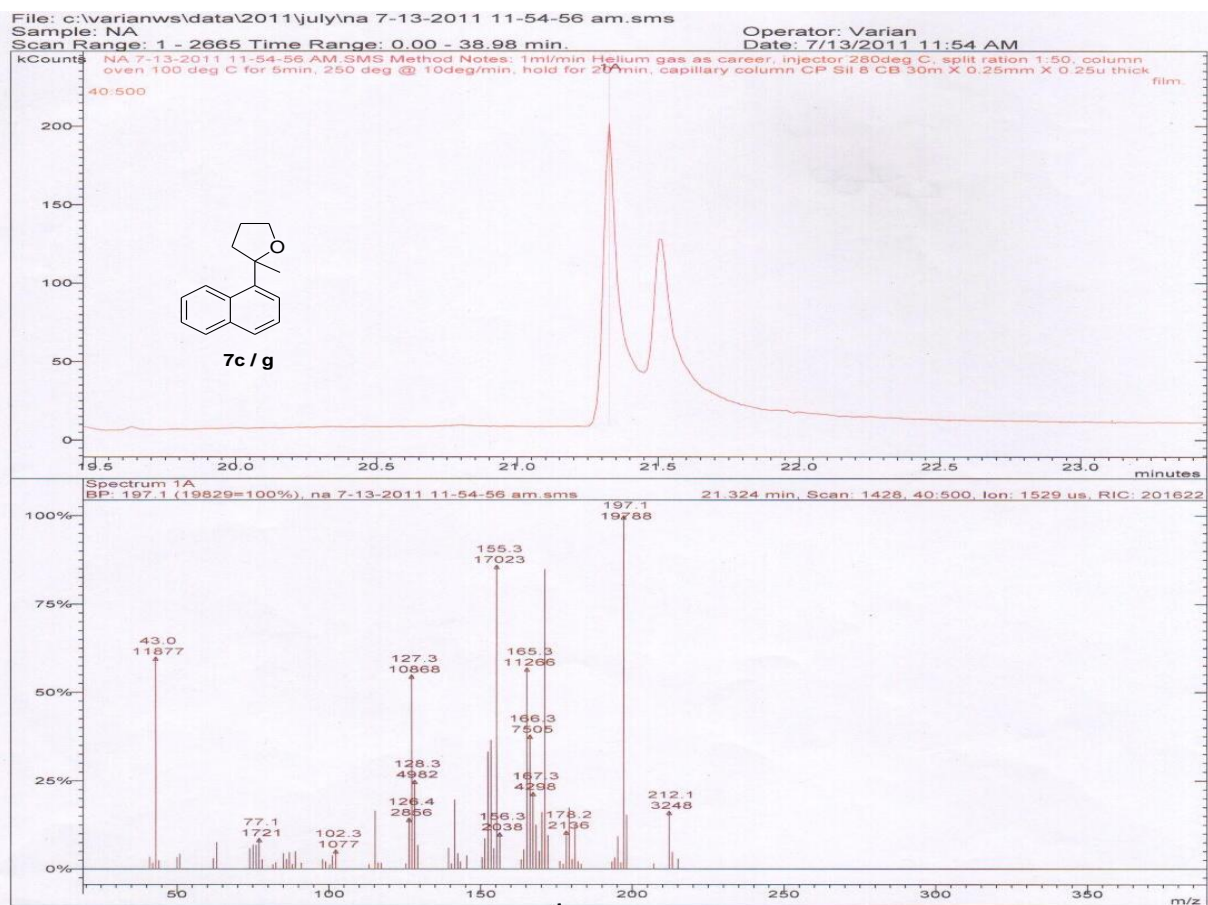



# DEPT at 135 for 2-(4-chlorophenyl)-5-methyl-tetrahydrofuran and 2-(4-chlorophenyl)-2-methyl-tetrahydrofuran in CDCl<sub>3</sub> (Table 3, entry d and h)

Aug19-2011-pumima  
Cl

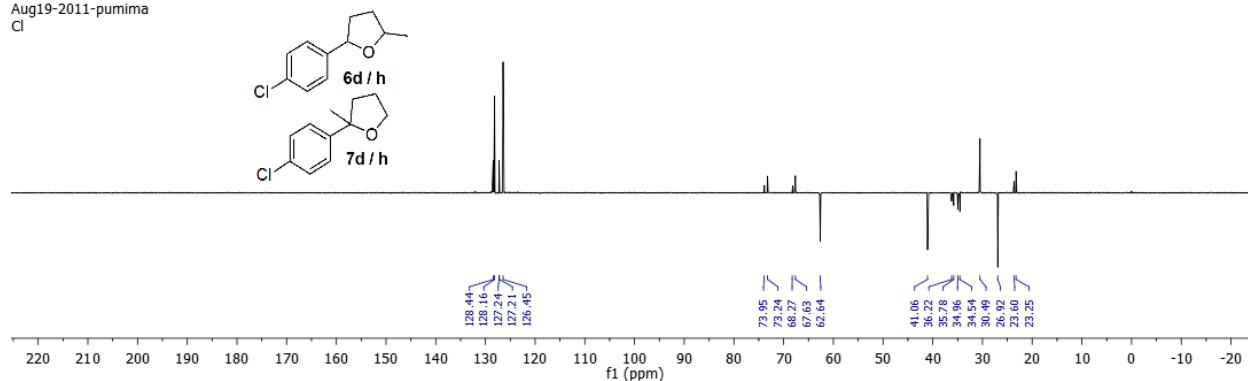

## GCMS for 2-(4-chlorophenyl)-5-methyl-tetrahydrofuran (Table 3, entry d and h)

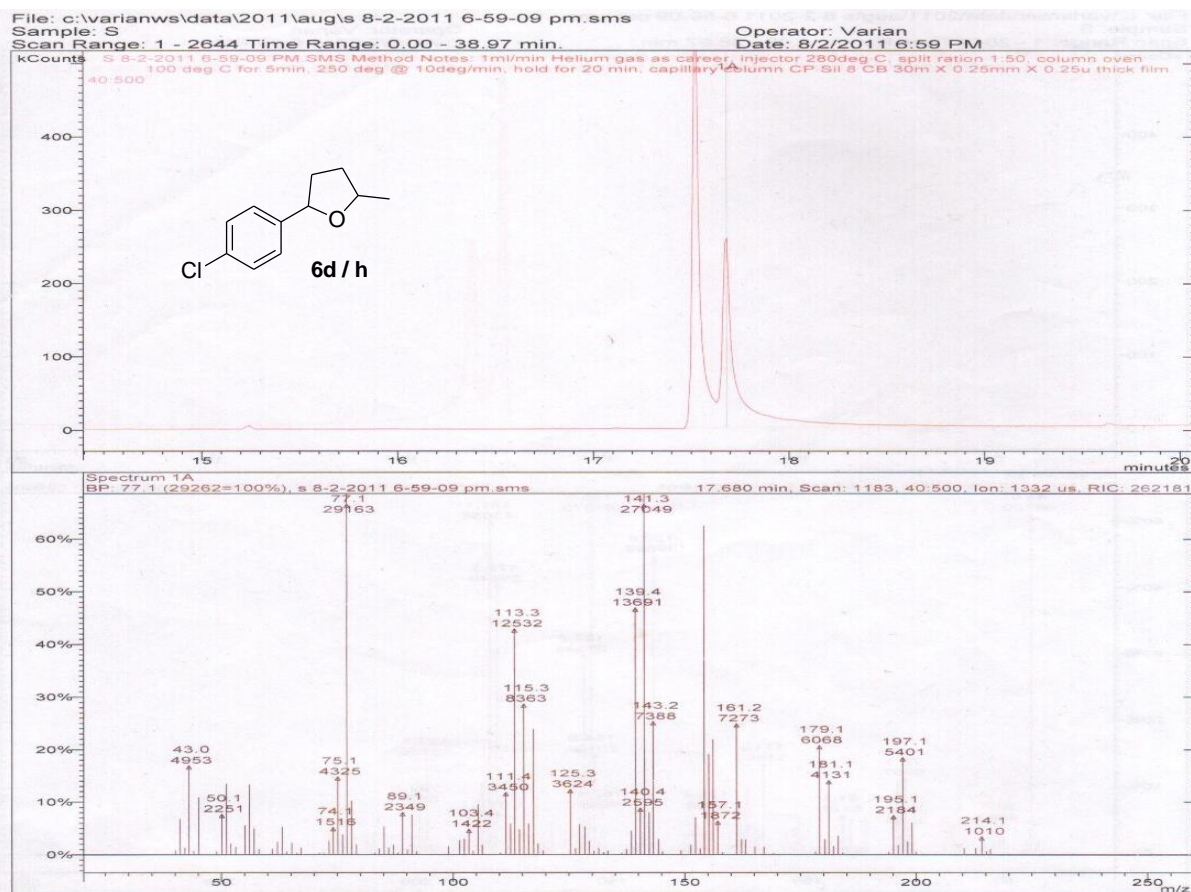

# GCMS for 2-(4-chlorophenyl)-2-methyl-tetrahydrofuran in CDCl<sub>3</sub> (Table 3, entry d and h)

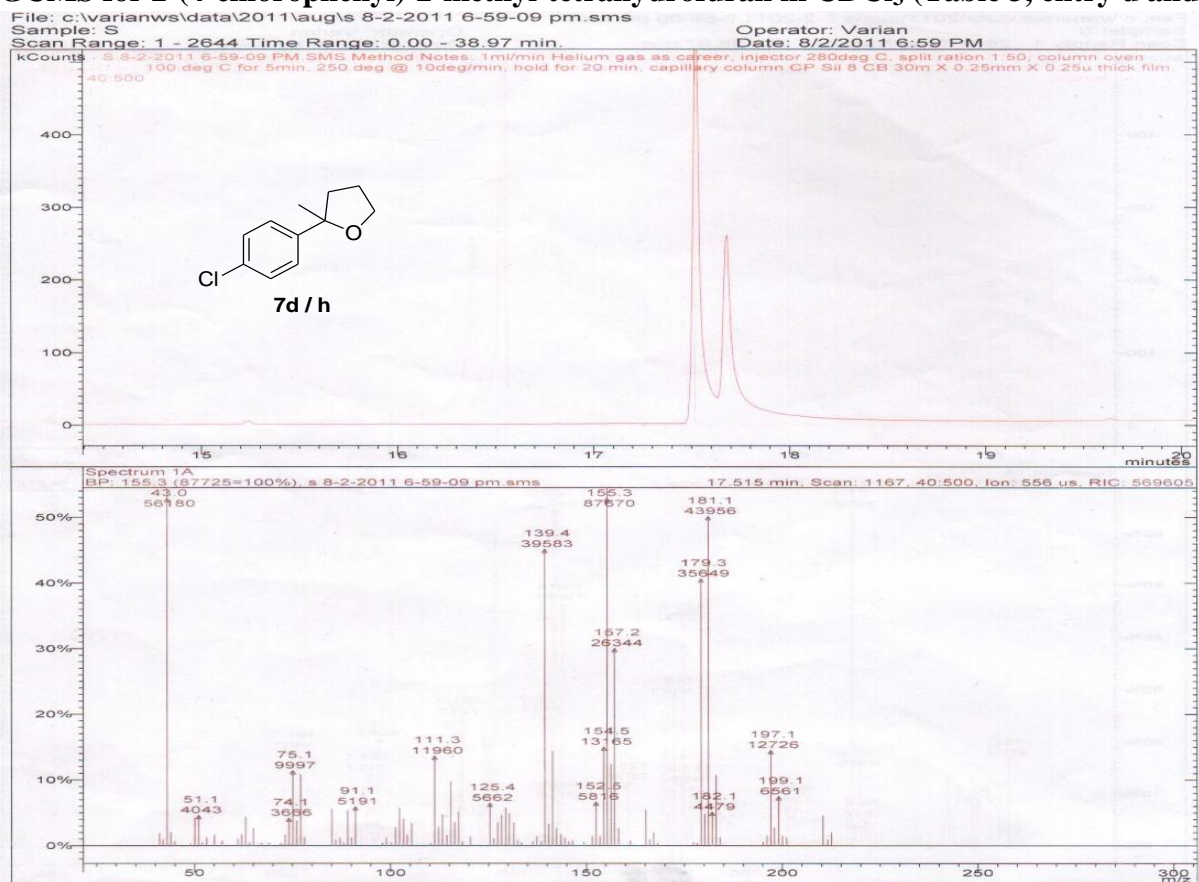



# **<sup>1</sup>H NMR for 2-phenyl-tetrahydro-2H-pyran in CDCl<sub>3</sub> (Table 4, entry a and e)**

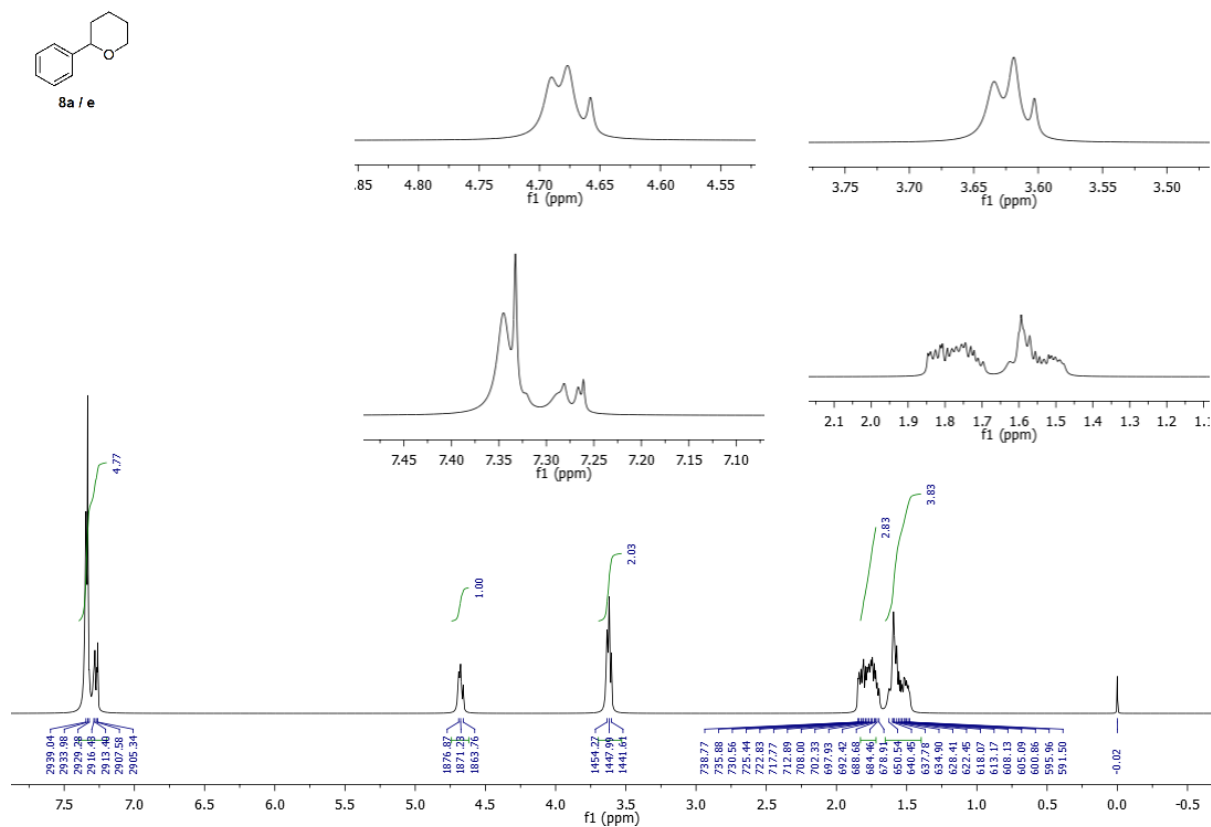

# DEPT at 135 for 2-phenyl-tetrahydro-2H-pyran in CDCl<sub>3</sub> (Table 4, entry a and e)

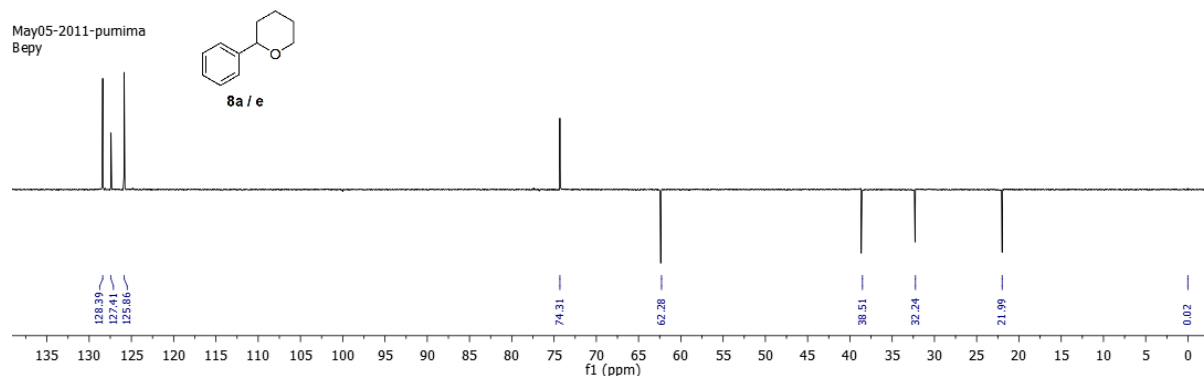

# GCMS for 2-phenyl-tetrahydro-2H-pyran (Table 4, entry a and e)

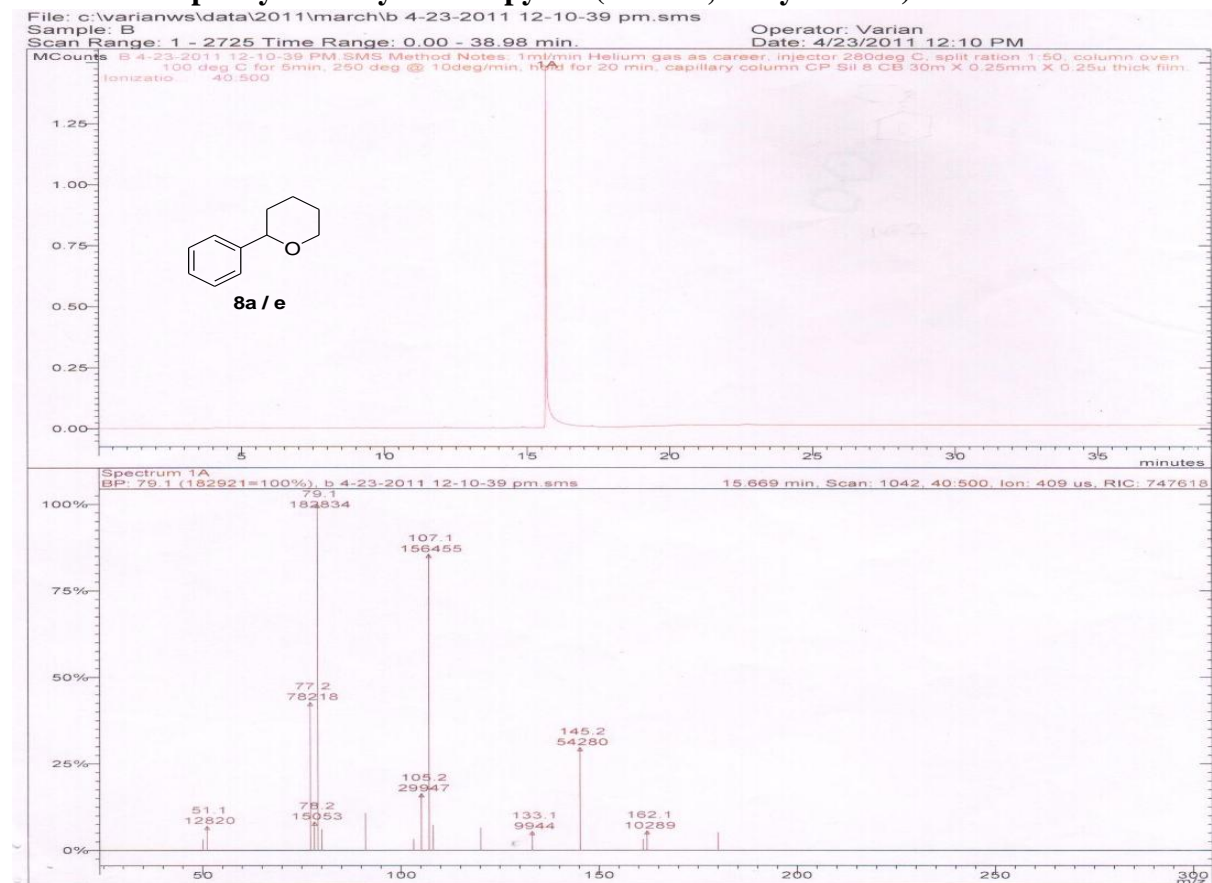

# **<sup>1</sup>H NMR for 2-(4-methoxyphenyl)-tetrahydro-2H-pyran in CDCl<sub>3</sub> (Table 4, entry b and f)**

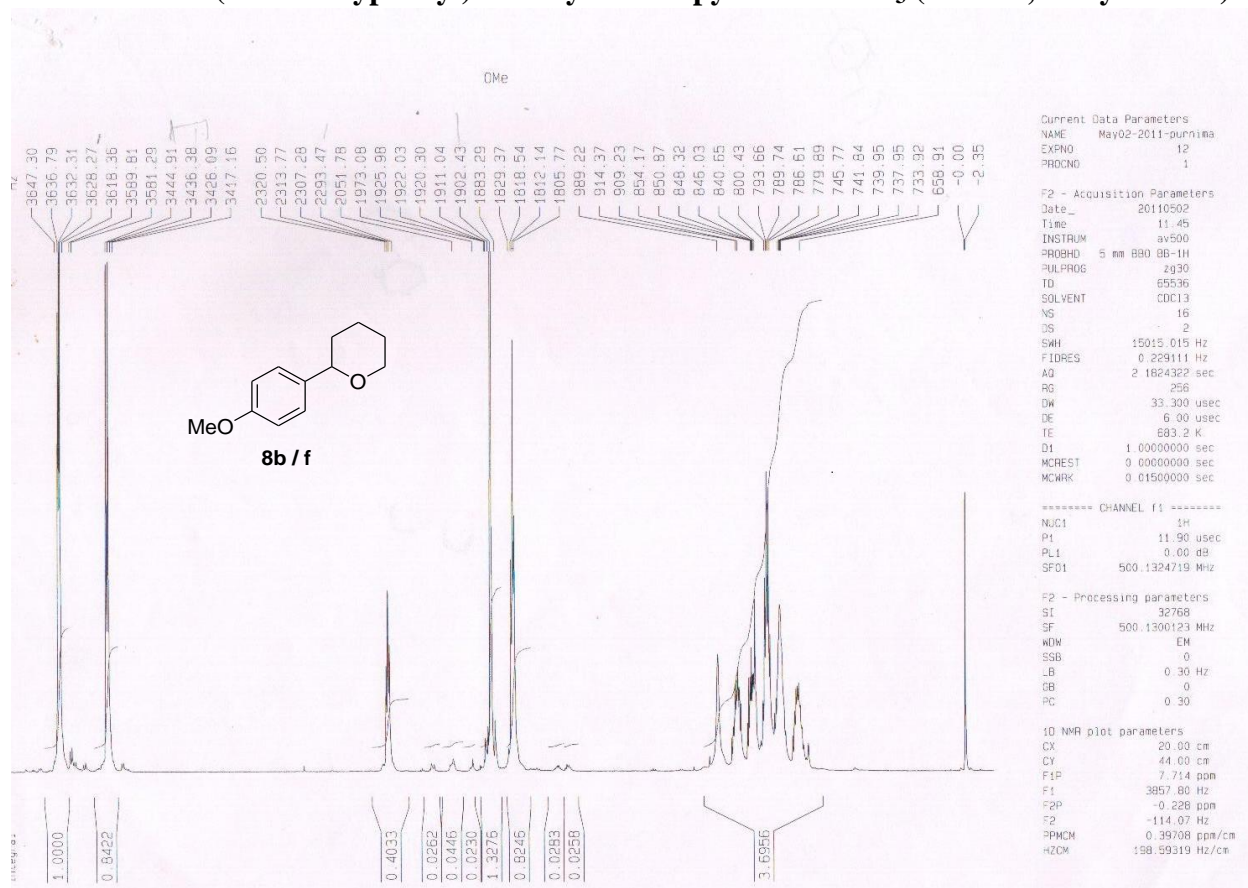

# **<sup>13</sup>C NMR for 2-(4-methoxyphenyl)-tetrahydro-2H-pyran in CDCl<sub>3</sub> (Table 4, entry b and f)**

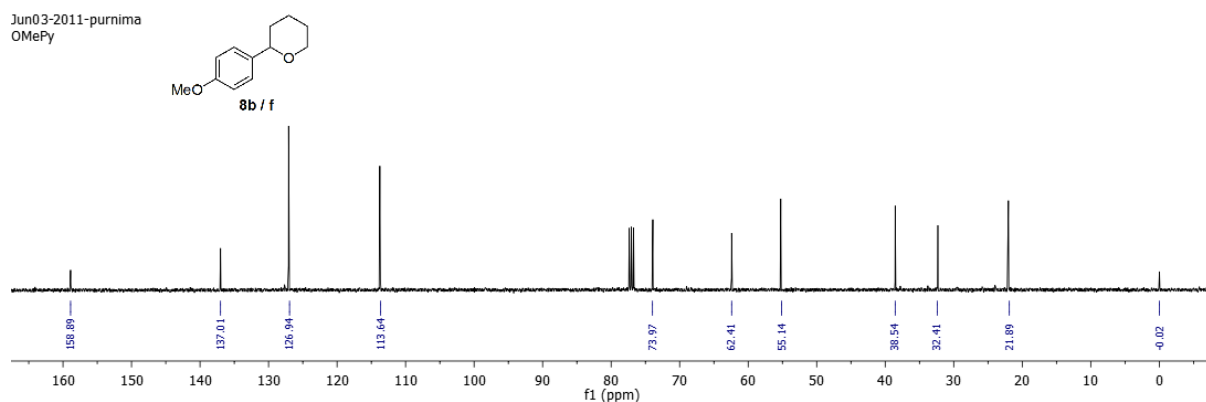



# DEPT at 135 for 2-(4-methoxyphenyl)-tetrahydro-2H-pyran in CDCl<sub>3</sub> (Table 4, entry b and f)

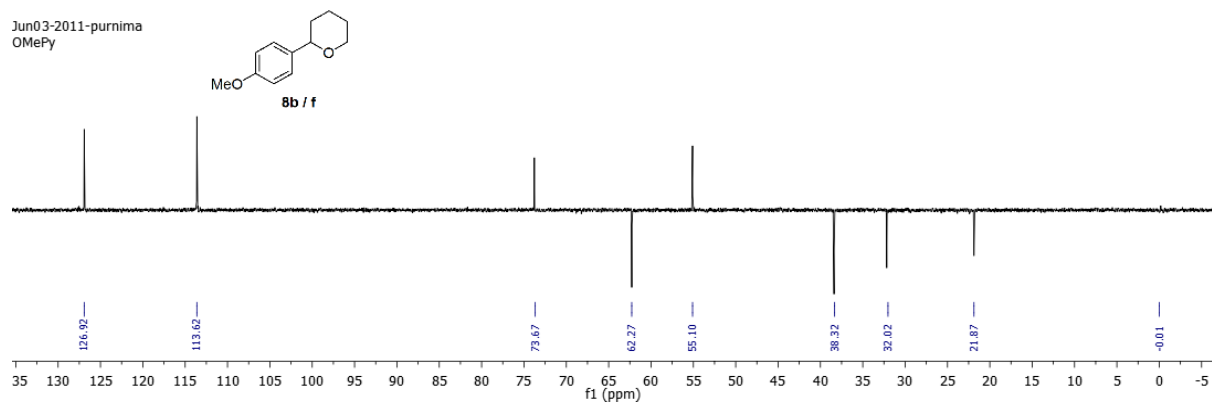

# GCMS for 2-(4-methoxyphenyl)-tetrahydro-2H-pyran (Table 4, entry b and f)

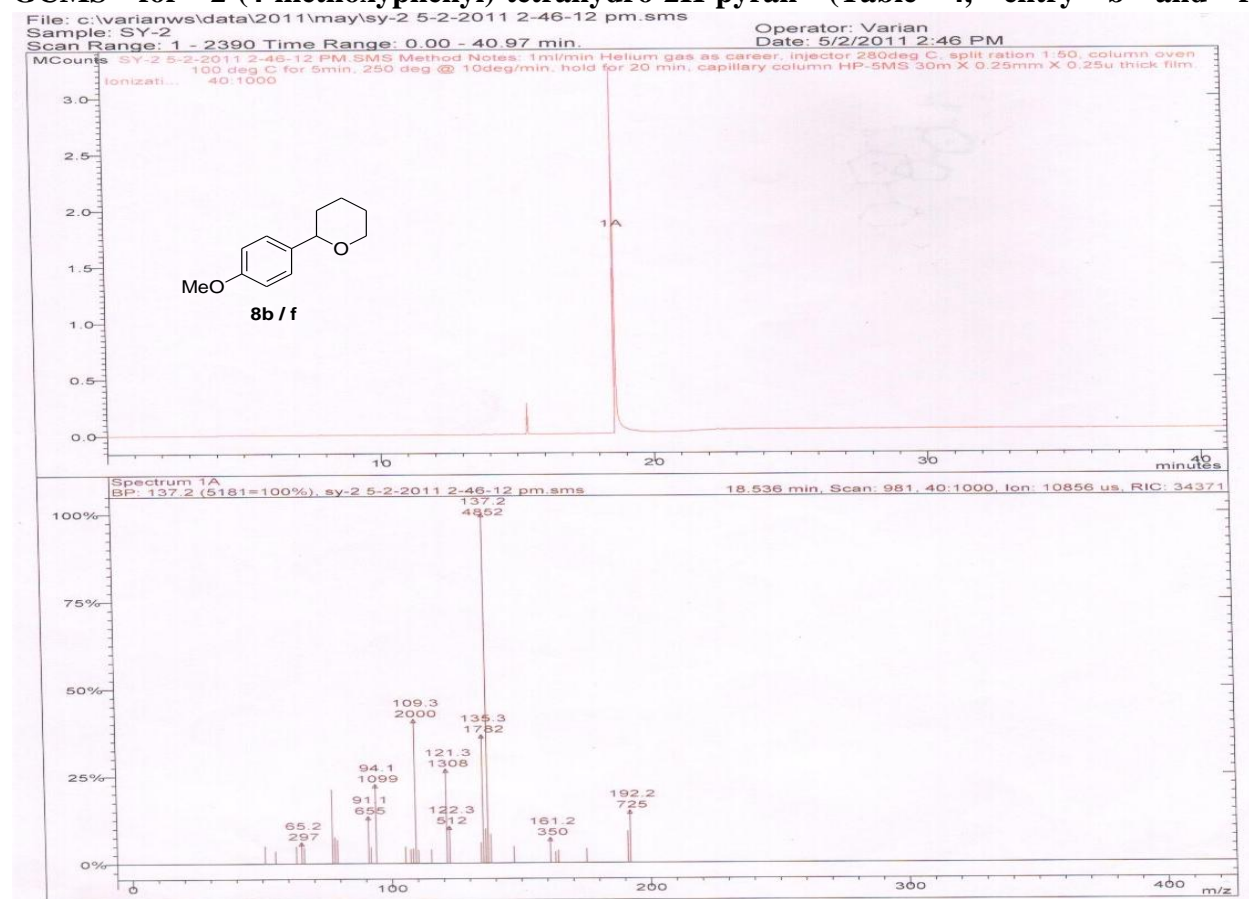



**DEPT at 135 for 2-(naphthalen-1-yl)-tetrahydro-2H-pyran in CD<sub>3</sub>OD (Table 4, entry c and g)**

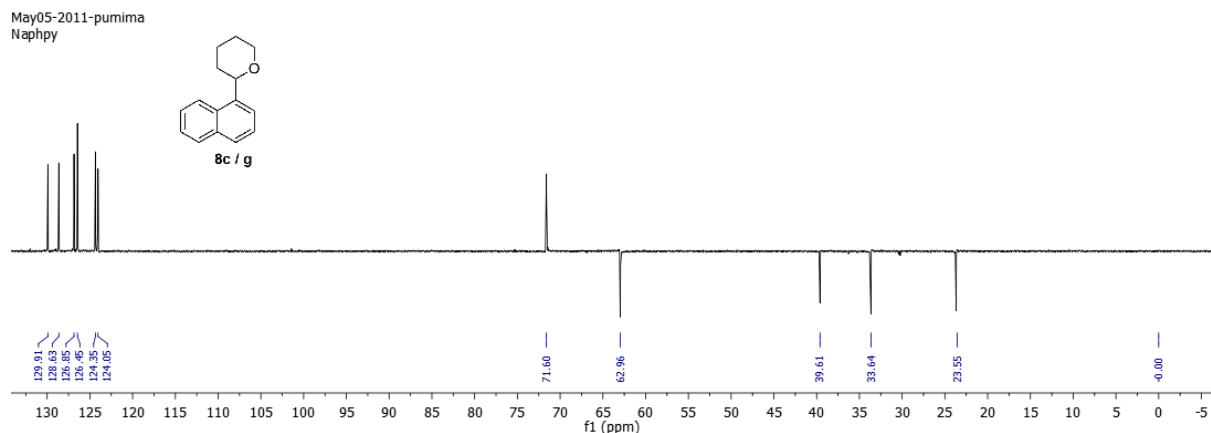

**GCMS for 2-(naphthalen-1-yl)-tetrahydro-2H-pyran (Table 4, entry c and g)**

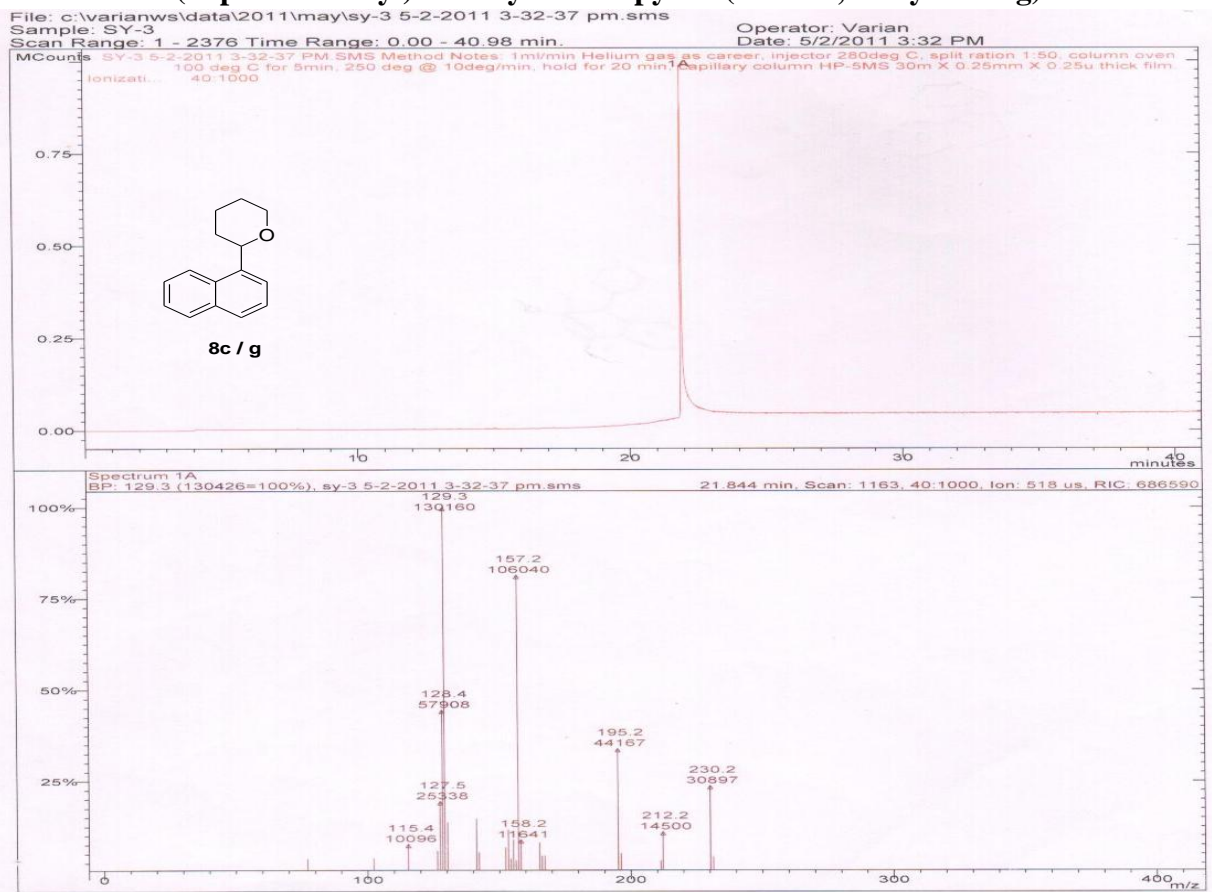

**<sup>1</sup>H NMR for 2-(4-chlorophenyl)-tetrahydro-2H-pyran in CDCl<sub>3</sub> (Table 4, entry d and h)**

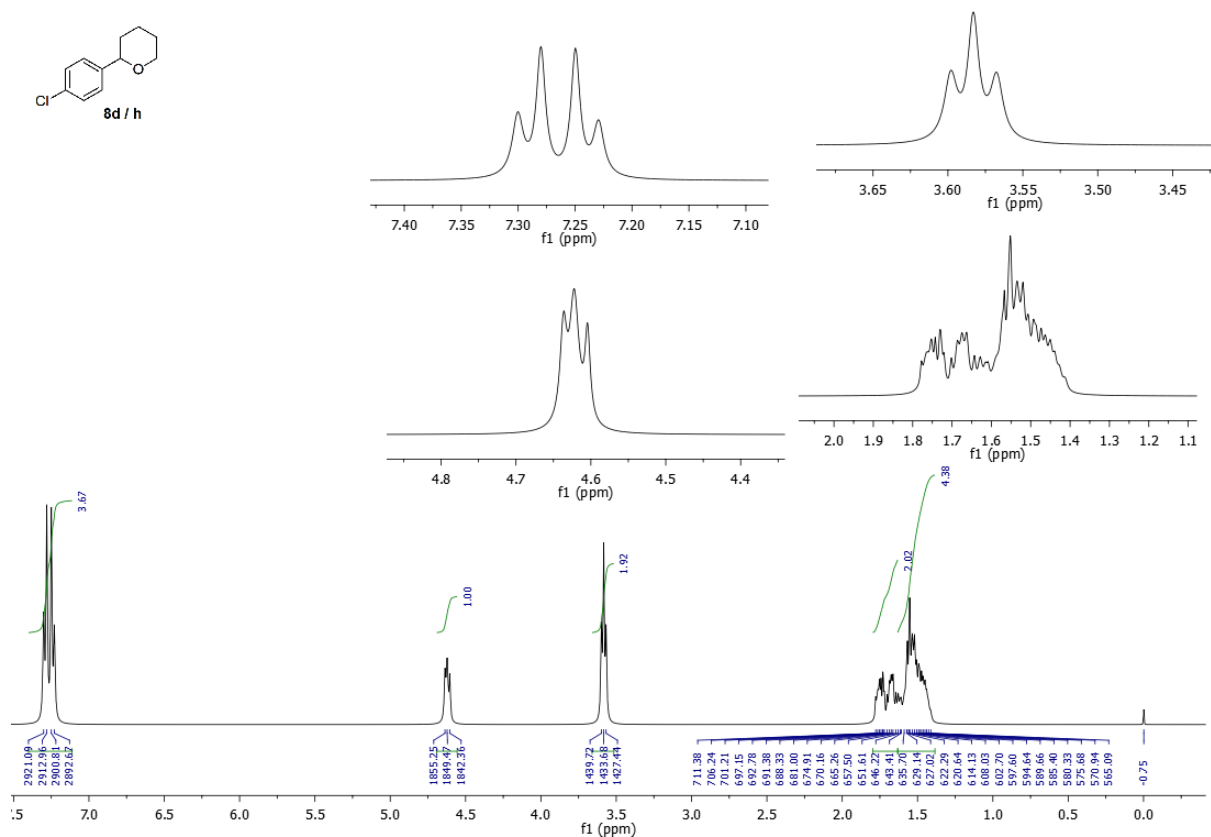

**<sup>13</sup>C NMR for 2-(4-chlorophenyl)-tetrahydro-2H-pyran in CDCl<sub>3</sub> (Table 4, entry d and h)**

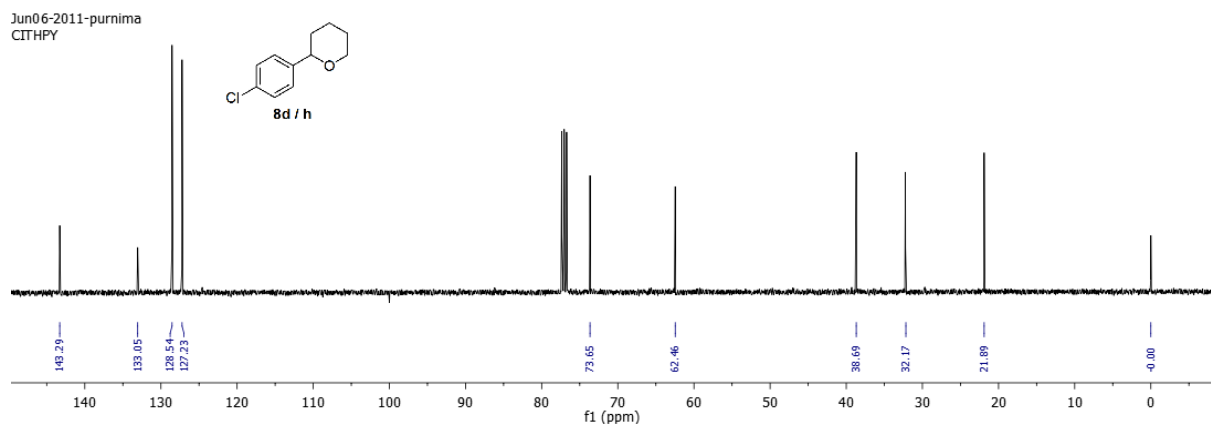

### DEPT at 135 for 2-(4-chlorophenyl)-tetrahydro-2H-pyran (Table 4, entry d and h)

Jun06-2011-purnima  
CITHPY

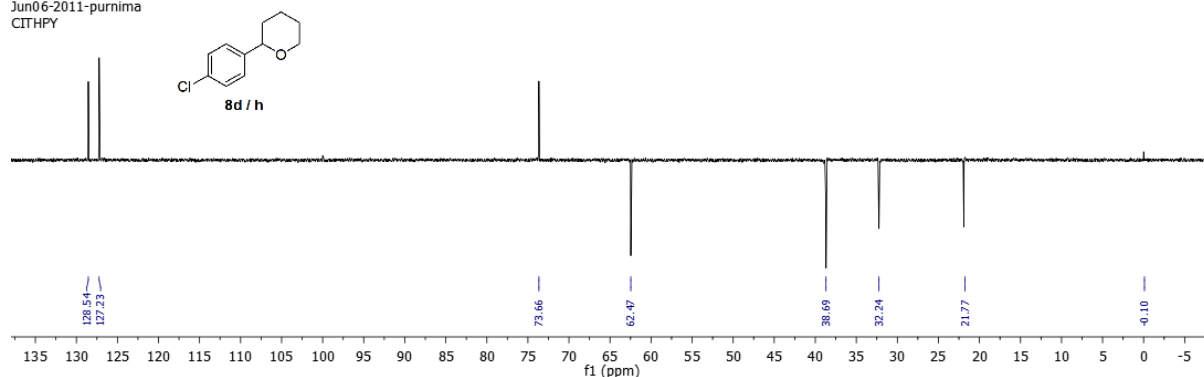

### GCMS for 2-(4-chlorophenyl)-tetrahydro-2H-pyran (Table 4, entry d and h)

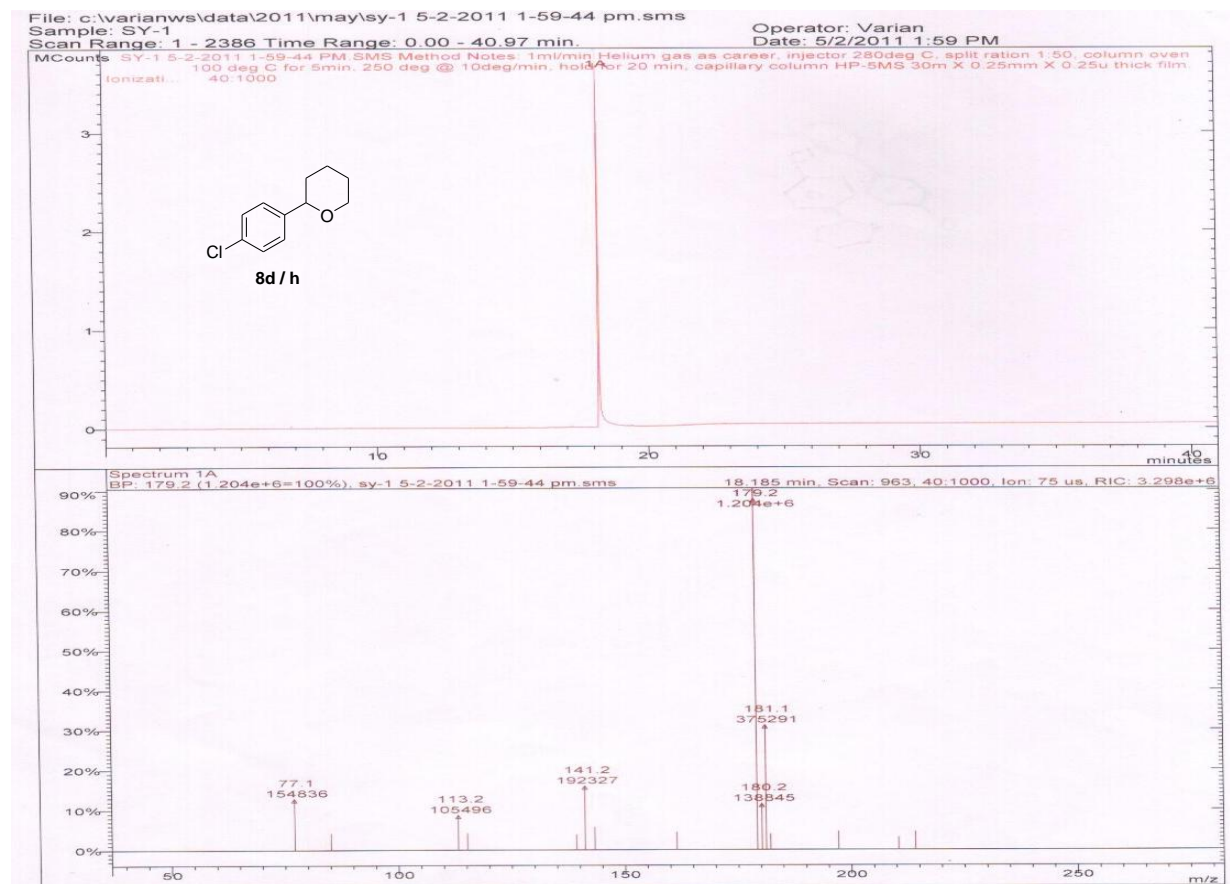



# DEPT at 135 for 1-(4-methoxyphenyl) ethanol in CDCl<sub>3</sub> (scheme 2, entry 11)

Jan28-2011-purnima  
olas

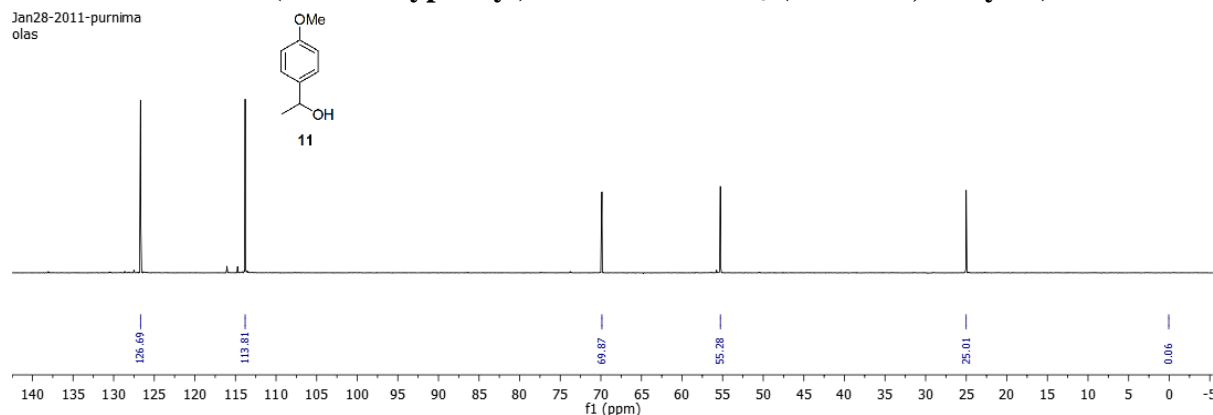

# GCMS for 1-(4-methoxyphenyl) ethanol (scheme 2, entry 11)

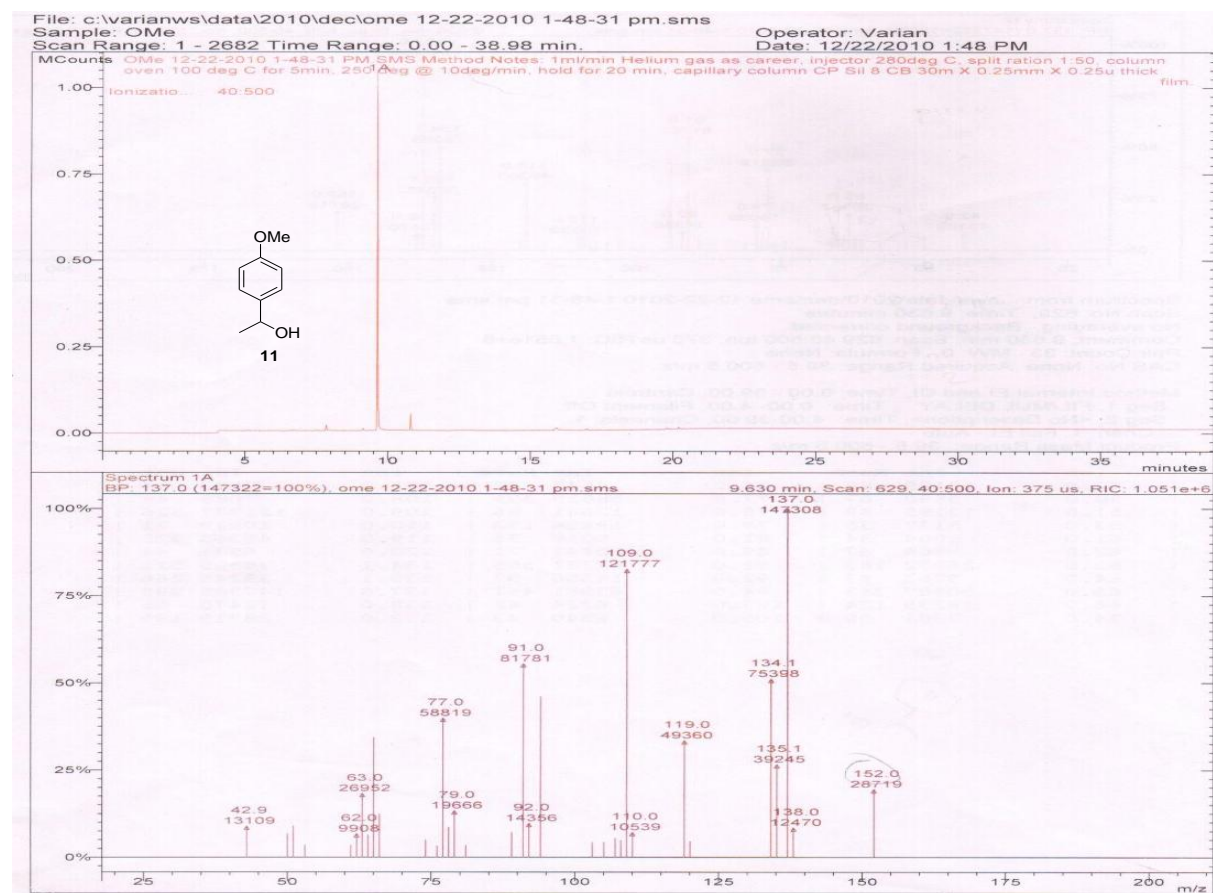

Supplement: c1ob06660a.pdf [file c1ob06660a.pdf]
